# Supplementary material for: MicroRNA Profiles of Maternal and Neonatal Endothelial Progenitor Cells in Preeclampsia
Source: Int J Mol Sci. 2021 May 18;22(10):5320. doi: 10.3390/ijms22105320 (PMC8158476; doi:10.3390/ijms22105320)
Supplement: Supplementary file 1 [file ijms-22-05320-s001.zip › Suppl_Table_2.xls]

## Sheet: Targets miR-1270
TargetScan v.7.2: 4322 predicted targets for hsa-miR-1270 in TargetScan							miRDB: predicted targets for hsa-miR-1270 in miRDB.			402 common targets in "miRDB" and "TargetScan":
Gene Symbol	Gene name	ITCH	itchy E3 ubiquitin protein ligase				Gene Symbol	Gene name		Gene Symbol
A1CF	APOBEC1 complementation factor	ITFG1	integrin alpha FG-GAP repeat containing 1				A1CF	APOBEC1 complementation factor		A1CF
A4GNT	alpha-1,4-N-acetylglucosaminyltransferase	ITFG2	integrin alpha FG-GAP repeat containing 2				AAK1	AP2 associated kinase 1		AAK1
AAK1	AP2 associated kinase 1	ITGA1	integrin, alpha 1				ABCA3	ATP binding cassette subfamily A member 3		ABCA3
AASS	aminoadipate-semialdehyde synthase	ITGA10	integrin, alpha 10				ABCC4	ATP binding cassette subfamily C member 4		ABCC4
ABCA3	ATP-binding cassette, sub-family A (ABC1), member 3	ITGA2B	integrin, alpha 2b (platelet glycoprotein IIb of IIb/IIIa complex, antigen CD41)				ABLIM1	actin binding LIM protein 1		ABLIM1
ABCA9	ATP-binding cassette, sub-family A (ABC1), member 9	ITGA3	integrin, alpha 3 (antigen CD49C, alpha 3 subunit of VLA-3 receptor)				ACAD10	acyl-CoA dehydrogenase family member 10		ACAD10
ABCB11	ATP-binding cassette, sub-family B (MDR/TAP), member 11	ITGB3	integrin, beta 3 (platelet glycoprotein IIIa, antigen CD61)				ACTBL2	actin, beta like 2		ACTBL2
ABCC4	ATP-binding cassette, sub-family C (CFTR/MRP), member 4	ITGBL1	integrin, beta-like 1 (with EGF-like repeat domains)				ADCY2	adenylate cyclase 2		ADCY2
ABCD2	ATP-binding cassette, sub-family D (ALD), member 2	ITIH5	inter-alpha-trypsin inhibitor heavy chain family, member 5				ADI1	acireductone dioxygenase 1		ADI1
ABCD4	ATP-binding cassette, sub-family D (ALD), member 4	ITIH6	inter-alpha-trypsin inhibitor heavy chain family, member 6				ADSSL1	adenylosuccinate synthase like 1		ADSSL1
ABCF1	ATP-binding cassette, sub-family F (GCN20), member 1	ITM2C	integral membrane protein 2C				AFP	alpha fetoprotein		AFP
ABCF2	ATP-binding cassette, sub-family F (GCN20), member 2	ITPK1	inositol-tetrakisphosphate 1-kinase				AHCYL2	adenosylhomocysteinase like 2		AHCYL2
ABCG1	ATP-binding cassette, sub-family G (WHITE), member 1	ITPKB	inositol-trisphosphate 3-kinase B				AHI1	Abelson helper integration site 1		AHI1
ABCG4	ATP-binding cassette, sub-family G (WHITE), member 4	ITPRIP	inositol 1,4,5-trisphosphate receptor interacting protein				AHR	aryl hydrocarbon receptor		AHR
ABHD14A-ACY1	ABHD14A-ACY1 readthrough (NMD candidate)	ITPRIPL1	inositol 1,4,5-trisphosphate receptor interacting protein-like 1				AMD1	adenosylmethionine decarboxylase 1		AMD1
ABHD15	abhydrolase domain containing 15	ITPRIPL2	inositol 1,4,5-trisphosphate receptor interacting protein-like 2				AMER1	APC membrane recruitment protein 1		AMER1
ABHD16A	abhydrolase domain containing 16A	IVNS1ABP	influenza virus NS1A binding protein				AMZ1	archaelysin family metallopeptidase 1		AMZ1
ABHD2	abhydrolase domain containing 2	JAK2	Janus kinase 2				ANAPC7	anaphase promoting complex subunit 7		ANAPC7
ABHD5	abhydrolase domain containing 5	JAKMIP3	Janus kinase and microtubule interacting protein 3				ANGPTL7	angiopoietin like 7		ANGPTL7
ABI1	abl-interactor 1	JARID2	jumonji, AT rich interactive domain 2				ANKFY1	ankyrin repeat and FYVE domain containing 1		ANKFY1
ABI2	abl-interactor 2	JDP2	Jun dimerization protein 2				ANKRD33B	ankyrin repeat domain 33B		ANKRD33B
ABL1	c-abl oncogene 1, non-receptor tyrosine kinase	JHDM1D	jumonji C domain containing histone demethylase 1 homolog D (S. cerevisiae)				ANKRD44	ankyrin repeat domain 44		ANKRD44
ABL2	c-abl oncogene 2, non-receptor tyrosine kinase	JMJD1C	jumonji domain containing 1C				ANTXR2	ANTXR cell adhesion molecule 2		ANTXR2
ABLIM1	actin binding LIM protein 1	JMY	junction mediating and regulatory protein, p53 cofactor				ANXA3	annexin A3		APAF1
ABLIM3	actin binding LIM protein family, member 3	JOSD1	Josephin domain containing 1				APAF1	apoptotic peptidase activating factor 1		AQP11
ABR	active BCR-related	JPH3	junctophilin 3				AQP11	aquaporin 11		ARAF
ABRA	actin-binding Rho activating protein	KANK2	KN motif and ankyrin repeat domains 2				ARAF	A-Raf proto-oncogene, serine/threonine kinase		ARID1B
ABT1	activator of basal transcription 1	KAT7	K(lysine) acetyltransferase 7				ARID1B	AT-rich interaction domain 1B		ATP10D
AC002472.13	Leucine-rich repeat-containing protein LOC400891	KAT8	K(lysine) acetyltransferase 8				ASPH	aspartate beta-hydroxylase		ATP12A
AC006132.1	uncharacterized protein LOC100287177	KATNAL1	katanin p60 subunit A-like 1				ATF7	activating transcription factor 7		ATXN1
AC006486.1		KATNBL1	katanin p80 subunit B-like 1				ATP10D	ATPase phospholipid transporting 10D (putative)		ATXN7L1
AC007375.1	Uncharacterized protein; cDNA FLJ43210 fis, clone FEBRA2020582	KAZALD1	Kazal-type serine peptidase inhibitor domain 1				ATP12A	ATPase H+/K+ transporting non-gastric alpha2 subunit		BAAT
AC007405.2	Uncharacterized protein	KBTBD12	kelch repeat and BTB (POZ) domain containing 12				ATXN1	ataxin 1		BACE1
AC008132.13	Uncharacterized protein	KCNA1	potassium voltage-gated channel, shaker-related subfamily, member 1 (episodic ataxia with myokymia)				ATXN7L1	ataxin 7 like 1		BCL11B
AC008267.1	HCG1983814; Uncharacterized protein	KCNA3	potassium voltage-gated channel, shaker-related subfamily, member 3				B9D1	B9 domain containing 1		BET1L
AC008394.1	Uncharacterized protein	KCNA4	potassium voltage-gated channel, shaker-related subfamily, member 4				BAAT	bile acid-CoA:amino acid N-acyltransferase		BMP2
AC012215.1	Uncharacterized protein	KCNA5	potassium voltage-gated channel, shaker-related subfamily, member 5				BACE1	beta-secretase 1		BMP8B
AC016559.1	Uncharacterized protein	KCNA6	potassium voltage-gated channel, shaker-related subfamily, member 6				BCL11B	BCL11B, BAF complex component		C15orf40
AC073610.5	Uncharacterized protein	KCNB1	potassium voltage-gated channel, Shab-related subfamily, member 1				BET1L	Bet1 golgi vesicular membrane trafficking protein like		C1orf174
AC074389.6	LOC401296 protein; Uncharacterized protein	KCNC1	potassium voltage-gated channel, Shaw-related subfamily, member 1				BMP2	bone morphogenetic protein 2		C1orf21
AC079354.2	Uncharacterized protein	KCND1	potassium voltage-gated channel, Shal-related subfamily, member 1				BMP8B	bone morphogenetic protein 8b		C6orf15
AC079602.1		KCND2	potassium voltage-gated channel, Shal-related subfamily, member 2				BORCS7	BLOC-1 related complex subunit 7		CACNA1E
AC084121.16	Homo sapiens proline-rich protein 23C-like (LOC100133251), mRNA.	KCNE3	potassium voltage-gated channel, Isk-related family, member 3				C15orf40	chromosome 15 open reading frame 40		CADM4
AC093157.1	Uncharacterized protein	KCNE4	potassium voltage-gated channel, Isk-related family, member 4				C1orf174	chromosome 1 open reading frame 174		CADPS2
AC093677.1	Uncharacterized protein	KCNG3	potassium voltage-gated channel, subfamily G, member 3				C1orf21	chromosome 1 open reading frame 21		CALN1
AC093802.1	Uncharacterized protein	KCNG4	potassium voltage-gated channel, subfamily G, member 4				C6orf15	chromosome 6 open reading frame 15		CAMK4
AC106017.1	Uncharacterized protein	KCNH1	potassium voltage-gated channel, subfamily H (eag-related), member 1				CACNA1E	calcium voltage-gated channel subunit alpha1 E		CAPRIN1
AC107021.1	HCG1786590; PRO2533; Uncharacterized protein	KCNIP1	Kv channel interacting protein 1				CADM4	cell adhesion molecule 4		CASP14
AC110781.3	Protein LOC100128374	KCNJ1	potassium inwardly-rectifying channel, subfamily J, member 1				CADPS2	calcium dependent secretion activator 2		CBFB
AC127496.1	Uncharacterized protein	KCNJ15	potassium inwardly-rectifying channel, subfamily J, member 15				CALN1	calneuron 1		CBLB
AC132872.2	CDNA FLJ27256 fis, clone SYN09689; Uncharacterized protein	KCNJ3	potassium inwardly-rectifying channel, subfamily J, member 3				CAMK4	calcium/calmodulin dependent protein kinase IV		CCDC117
AC135178.1	HCG1985372; Uncharacterized protein; cDNA FLJ37541 fis, clone BRCAN2026340	KCNJ5	potassium inwardly-rectifying channel, subfamily J, member 5				CAPRIN1	cell cycle associated protein 1		CCDC74A
AC135983.2	Protein LOC100996413	KCNJ6	potassium inwardly-rectifying channel, subfamily J, member 6				CASP14	caspase 14		CCDC74B
AC137932.1		KCNJ9	potassium inwardly-rectifying channel, subfamily J, member 9				CATSPERE	catsper channel auxiliary subunit epsilon		CCNT2
AC138655.1	CDNA: FLJ23120 fis, clone LNG07989; HCG1987724; Uncharacterized protein	KCNK1	potassium channel, subfamily K, member 1				CBFB	core-binding factor subunit beta		CCNYL1
AC174470.1		KCNK10	potassium channel, subfamily K, member 10				CBLB	Cbl proto-oncogene B		CCR7
ACACB	acetyl-CoA carboxylase beta	KCNK12	potassium channel, subfamily K, member 12				CBLIF	cobalamin binding intrinsic factor		CD209
ACAD10	acyl-CoA dehydrogenase family, member 10	KCNK5	potassium channel, subfamily K, member 5				CCDC117	coiled-coil domain containing 117		CD276
ACAD11	acyl-CoA dehydrogenase family, member 11	KCNMB3	potassium large conductance calcium-activated channel, subfamily M beta member 3				CCDC74A	coiled-coil domain containing 74A		CD28
ACADSB	acyl-CoA dehydrogenase, short/branched chain	KCNN3	potassium intermediate/small conductance calcium-activated channel, subfamily N, member 3				CCDC74B	coiled-coil domain containing 74B		CD3EAP
ACBD3	acyl-CoA binding domain containing 3	KCNQ3	potassium voltage-gated channel, KQT-like subfamily, member 3				CCNT2	cyclin T2		CD96
ACE	angiotensin I converting enzyme	KCTD10	potassium channel tetramerization domain containing 10				CCNYL1	cyclin Y like 1		CDC42SE1
ACER3	alkaline ceramidase 3	KCTD12	potassium channel tetramerization domain containing 12				CCR7	C-C motif chemokine receptor 7		CDH11
ACOT13	acyl-CoA thioesterase 13	KCTD16	potassium channel tetramerization domain containing 16				CD209	CD209 molecule		CDK17
ACOT2	acyl-CoA thioesterase 2	KCTD18	potassium channel tetramerization domain containing 18				CD276	CD276 molecule		CDRT4
ACOX1	acyl-CoA oxidase 1, palmitoyl	KCTD20	potassium channel tetramerization domain containing 20				CD28	CD28 molecule		CEACAM1
ACOX3	acyl-CoA oxidase 3, pristanoyl	KCTD21	potassium channel tetramerization domain containing 21				CD3EAP	CD3e molecule associated protein		CELSR2
ACP2	acid phosphatase 2, lysosomal	KDELR1	KDEL (Lys-Asp-Glu-Leu) endoplasmic reticulum protein retention receptor 1				CD96	CD96 molecule		CEP164
ACP5	acid phosphatase 5, tartrate resistant	KDELR3	KDEL (Lys-Asp-Glu-Leu) endoplasmic reticulum protein retention receptor 3				CDC42SE1	CDC42 small effector 1		CGGBP1
ACRV1	acrosomal vesicle protein 1	KDM2A	lysine (K)-specific demethylase 2A				CDH11	cadherin 11		CGN
ACSBG1	acyl-CoA synthetase bubblegum family member 1	KDM2B	lysine (K)-specific demethylase 2B				CDK17	cyclin dependent kinase 17		CHRNB2
ACSF3	acyl-CoA synthetase family member 3	KDM3A	lysine (K)-specific demethylase 3A				CDKL5	cyclin dependent kinase like 5		CHSY1
ACSS1	acyl-CoA synthetase short-chain family member 1	KDM4B	lysine (K)-specific demethylase 4B				CDRT4	CMT1A duplicated region transcript 4		CIR1
ACTBL2	actin, beta-like 2	KDM5A	lysine (K)-specific demethylase 5A				CEACAM1	carcinoembryonic antigen related cell adhesion molecule 1		CLCN3
ACTL8	actin-like 8	KHDRBS3	KH domain containing, RNA binding, signal transduction associated 3				CELSR2	cadherin EGF LAG seven-pass G-type receptor 2		CLN5
ACTN1	actinin, alpha 1	KHNYN	KH and NYN domain containing				CEP164	centrosomal protein 164		CLTC
ACTR1A	ARP1 actin-related protein 1 homolog A, centractin alpha (yeast)	KIAA0040	KIAA0040				CGGBP1	CGG triplet repeat binding protein 1		CNDP1
ACTR3	ARP3 actin-related protein 3 homolog (yeast)	KIAA0087	KIAA0087				CGN	cingulin		CNGB3
ACTRT3	actin-related protein T3	KIAA0101	KIAA0101				CHRNB2	cholinergic receptor nicotinic beta 2 subunit		CNNM1
ACVR1C	activin A receptor, type IC	KIAA0141	KIAA0141				CHSY1	chondroitin sulfate synthase 1		CNOT6
ACVR2A	activin A receptor, type IIA	KIAA0226	KIAA0226				CIR1	corepressor interacting with RBPJ, 1		CNOT7
ACVR2B	activin A receptor, type IIB	KIAA0226L	KIAA0226-like				CLCN3	chloride voltage-gated channel 3		CNTN3
ACY1	aminoacylase 1	KIAA0232	KIAA0232				CLN5	CLN5, intracellular trafficking protein		COL22A1
ACYP1	acylphosphatase 1, erythrocyte (common) type	KIAA0355	KIAA0355				CLTC	clathrin heavy chain		COL4A1
ADAL	adenosine deaminase-like	KIAA0368	KIAA0368				CNDP1	carnosine dipeptidase 1		COPS4
ADAM10	ADAM metallopeptidase domain 10	KIAA0391	KIAA0391				CNGB3	cyclic nucleotide gated channel beta 3		COPZ1
ADAM11	ADAM metallopeptidase domain 11	KIAA0930	KIAA0930				CNNM1	cyclin and CBS domain divalent metal cation transport mediator 1		CPEB2
ADAM12	ADAM metallopeptidase domain 12	KIAA1009	KIAA1009				CNOT6	CCR4-NOT transcription complex subunit 6		CPNE6
ADAM19	ADAM metallopeptidase domain 19	KIAA1024	KIAA1024				CNOT7	CCR4-NOT transcription complex subunit 7		CRTAP
ADAM28	ADAM metallopeptidase domain 28	KIAA1143	KIAA1143				CNTN3	contactin 3		CSRNP3
ADAM7	ADAM metallopeptidase domain 7	KIAA1147	KIAA1147				COL22A1	collagen type XXII alpha 1 chain		CTNND1
ADAMTS1	ADAM metallopeptidase with thrombospondin type 1 motif, 1	KIAA1161	KIAA1161				COL4A1	collagen type IV alpha 1 chain		CTSE
ADAMTS13	ADAM metallopeptidase with thrombospondin type 1 motif, 13	KIAA1210	KIAA1210				COPS4	COP9 signalosome subunit 4		CXCR6
ADAMTS18	ADAM metallopeptidase with thrombospondin type 1 motif, 18	KIAA1211	KIAA1211				COPZ1	coatomer protein complex subunit zeta 1		CYSLTR2
ADAMTS5	ADAM metallopeptidase with thrombospondin type 1 motif, 5	KIAA1324	KIAA1324				CPEB2	cytoplasmic polyadenylation element binding protein 2		DBX2
ADAMTS9	ADAM metallopeptidase with thrombospondin type 1 motif, 9	KIAA1407	KIAA1407				CPNE6	copine 6		DCPS
ADAMTSL5	ADAMTS-like 5	KIAA1429	KIAA1429				CRTAP	cartilage associated protein		DCTN3
ADAP1	ArfGAP with dual PH domains 1	KIAA1456	KIAA1456				CSRNP3	cysteine and serine rich nuclear protein 3		DCX
ADARB1	adenosine deaminase, RNA-specific, B1	KIAA1467	KIAA1467				CTNND1	catenin delta 1		DDI1
ADARB2	adenosine deaminase, RNA-specific, B2 (non-functional)	KIAA1468	KIAA1468				CTSE	cathepsin E		DDX10
ADAT1	adenosine deaminase, tRNA-specific 1	KIAA1524	KIAA1524				CWC27	CWC27 spliceosome associated protein homolog		DDX6
ADCK1	aarF domain containing kinase 1	KIAA1549	KIAA1549				CXCR6	C-X-C motif chemokine receptor 6		DDX60L
ADCY2	adenylate cyclase 2 (brain)	KIAA1551	KIAA1551				CYSLTR2	cysteinyl leukotriene receptor 2		DENND2C
ADCY6	adenylate cyclase 6	KIAA1644	KIAA1644				DBX2	developing brain homeobox 2		DENND6A
ADCYAP1R1	adenylate cyclase activating polypeptide 1 (pituitary) receptor type I	KIAA1671	KIAA1671				DCPS	decapping enzyme, scavenger		DGKE
ADD2	adducin 2 (beta)	KIAA1715	KIAA1715				DCTN3	dynactin subunit 3		DGKH
ADGB	androglobin	KIAA1737	KIAA1737				DCX	doublecortin		DIXDC1
ADH1B	alcohol dehydrogenase 1B (class I), beta polypeptide	KIAA1755	KIAA1755				DDI1	DNA damage inducible 1 homolog 1		DLX3
ADHFE1	alcohol dehydrogenase, iron containing, 1	KIAA1875	KIAA1875				DDX10	DEAD-box helicase 10		DNAAF3
ADI1	acireductone dioxygenase 1	KIAA1958	KIAA1958				DDX6	DEAD-box helicase 6		DPYSL3
ADIPOR2	adiponectin receptor 2	KIAA2022	KIAA2022				DDX60L	DExD/H-box 60 like		EDIL3
ADM2	adrenomedullin 2	KIDINS220	kinase D-interacting substrate, 220kDa				DENND1B	DENN domain containing 1B		EIF4B
ADNP2	ADNP homeobox 2	KIF1B	kinesin family member 1B				DENND2C	DENN domain containing 2C		ELMOD2
ADO	2-aminoethanethiol (cysteamine) dioxygenase	KIF20A	kinesin family member 20A				DENND6A	DENN domain containing 6A		EMCN
ADRA2B	adrenoceptor alpha 2B	KIF27	kinesin family member 27				DGKE	diacylglycerol kinase epsilon		ENTPD3
ADRBK2	adrenergic, beta, receptor kinase 2	KIF3A	kinesin family member 3A				DGKH	diacylglycerol kinase eta		EPB41L4B
ADSL	adenylosuccinate lyase	KIF5A	kinesin family member 5A				DIXDC1	DIX domain containing 1		EPHA6
ADSSL1	adenylosuccinate synthase like 1	KIFC2	kinesin family member C2				DLEU7	deleted in lymphocytic leukemia 7		F8
AEN	apoptosis enhancing nuclease	KIN	KIN, antigenic determinant of recA protein homolog (mouse)				DLX3	distal-less homeobox 3		FABP2
AFAP1L2	actin filament associated protein 1-like 2	KIR2DL1	killer cell immunoglobulin-like receptor, two domains, long cytoplasmic tail, 1				DNAAF3	dynein axonemal assembly factor 3		FABP5
AFF2	AF4/FMR2 family, member 2	KIR2DL3	killer cell immunoglobulin-like receptor, two domains, long cytoplasmic tail, 3				DOK3	docking protein 3		FAM102B
AFF3	AF4/FMR2 family, member 3	KIR2DL4	killer cell immunoglobulin-like receptor, two domains, long cytoplasmic tail, 4				DPYSL3	dihydropyrimidinase like 3		FAM114A2
AFMID	arylformamidase	KIR3DL1	killer cell immunoglobulin-like receptor, three domains, long cytoplasmic tail, 1				EDIL3	EGF like repeats and discoidin domains 3		FAM189A1
AFP	alpha-fetoprotein	KIR3DL2	killer cell immunoglobulin-like receptor, three domains, long cytoplasmic tail, 2				EIF4B	eukaryotic translation initiation factor 4B		FAM222B
AGAP9	ArfGAP with GTPase domain, ankyrin repeat and PH domain 9	KIR3DL3	killer cell immunoglobulin-like receptor, three domains, long cytoplasmic tail, 3				ELMOD2	ELMO domain containing 2		FAM8A1
AGBL3	ATP/GTP binding protein-like 3	KIRREL	kin of IRRE like (Drosophila)				EMCN	endomucin		FAR1
AGBL5	ATP/GTP binding protein-like 5	KIRREL2	kin of IRRE like 2 (Drosophila)				ENTPD3	ectonucleoside triphosphate diphosphohydrolase 3		FBXO28
AGFG2	ArfGAP with FG repeats 2	KIT	v-kit Hardy-Zuckerman 4 feline sarcoma viral oncogene homolog				EPB41L4B	erythrocyte membrane protein band 4.1 like 4B		FBXW7
AGMAT	agmatine ureohydrolase (agmatinase)	KITLG	KIT ligand				EPHA6	EPH receptor A6		FCGR1A
AGO3	argonaute RISC catalytic component 3	KLF11	Kruppel-like factor 11				EPPIN	epididymal peptidase inhibitor		FCGR1B
AGPAT1	1-acylglycerol-3-phosphate O-acyltransferase 1	KLF12	Kruppel-like factor 12				ETV7	ETS variant 7		FGL2
AGPAT3	1-acylglycerol-3-phosphate O-acyltransferase 3	KLF3	Kruppel-like factor 3 (basic)				F8	coagulation factor VIII		FLRT3
AGPAT4	1-acylglycerol-3-phosphate O-acyltransferase 4	KLF6	Kruppel-like factor 6				FABP2	fatty acid binding protein 2		FMO4
AGPAT6	1-acylglycerol-3-phosphate O-acyltransferase 6	KLHDC3	kelch domain containing 3				FABP5	fatty acid binding protein 5		FN1
AGPAT9	1-acylglycerol-3-phosphate O-acyltransferase 9	KLHDC8A	kelch domain containing 8A				FAM102B	family with sequence similarity 102 member B		FOXO1
AGPS	alkylglycerone phosphate synthase	KLHL11	kelch-like family member 11				FAM114A2	family with sequence similarity 114 member A2		FRS2
AGR2	anterior gradient 2	KLHL14	kelch-like family member 14				FAM120C	family with sequence similarity 120C		GALNT2
AGXT2	alanine--glyoxylate aminotransferase 2	KLHL17	kelch-like family member 17				FAM122C	family with sequence similarity 122C		GATAD1
AHCYL2	adenosylhomocysteinase-like 2	KLHL18	kelch-like family member 18				FAM189A1	family with sequence similarity 189 member A1		GCM2
AHI1	Abelson helper integration site 1	KLHL22	kelch-like family member 22				FAM222B	family with sequence similarity 222 member B		GIT2
AHR	aryl hydrocarbon receptor	KLHL23	kelch-like family member 23				FAM8A1	family with sequence similarity 8 member A1		GLI2
AHSA2	AHA1, activator of heat shock 90kDa protein ATPase homolog 2 (yeast)	KLHL26	kelch-like family member 26				FAR1	fatty acyl-CoA reductase 1		GLI3
AICDA	activation-induced cytidine deaminase	KLHL28	kelch-like family member 28				FBXO28	F-box protein 28		GLRA3
AIF1L	allograft inflammatory factor 1-like	KLHL3	kelch-like family member 3				FBXW7	F-box and WD repeat domain containing 7		GOLGA3
AIFM1	apoptosis-inducing factor, mitochondrion-associated, 1	KLHL30	kelch-like family member 30				FCGR1A	Fc fragment of IgG receptor Ia		GPC5
AIFM3	apoptosis-inducing factor, mitochondrion-associated, 3	KLHL31	kelch-like family member 31				FCGR1B	Fc fragment of IgG receptor Ib		GPR26
AIG1	androgen-induced 1	KLHL4	kelch-like family member 4				FGL2	fibrinogen like 2		GPX6
AJAP1	adherens junctions associated protein 1	KLHL42	kelch-like family member 42				FLRT3	fibronectin leucine rich transmembrane protein 3		GRHL2
AK2	adenylate kinase 2	KLHL5	kelch-like family member 5				FMO4	flavin containing monooxygenase 4		GSPT1
AKAP1	A kinase (PRKA) anchor protein 1	KLHL6	kelch-like family member 6				FN1	fibronectin 1		GTDC1
AKAP17A	A kinase (PRKA) anchor protein 17A	KLK2	kallikrein-related peptidase 2				FOXO1	forkhead box O1		GXYLT1
AKAP5	A kinase (PRKA) anchor protein 5	KLKB1	kallikrein B, plasma (Fletcher factor) 1				FRS2	fibroblast growth factor receptor substrate 2		HAS1
AKAP6	A kinase (PRKA) anchor protein 6	KLLN	killin, p53-regulated DNA replication inhibitor				GALNT2	polypeptide N-acetylgalactosaminyltransferase 2		HECW2
AKR1C2	aldo-keto reductase family 1, member C2	KLRC4	killer cell lectin-like receptor subfamily C, member 4				GATAD1	GATA zinc finger domain containing 1		HEG1
AKR1E2	aldo-keto reductase family 1, member E2	KLRD1	killer cell lectin-like receptor subfamily D, member 1				GCM2	glial cells missing transcription factor 2		HEXA
AKR7A2	aldo-keto reductase family 7, member A2 (aflatoxin aldehyde reductase)	KLRF1	killer cell lectin-like receptor subfamily F, member 1				GIT2	GIT ArfGAP 2		HKR1
AKT1	v-akt murine thymoma viral oncogene homolog 1	KLRK1	killer cell lectin-like receptor subfamily K, member 1				GLI2	GLI family zinc finger 2		HLA-DOB
AKTIP	AKT interacting protein	KMO	kynurenine 3-monooxygenase (kynurenine 3-hydroxylase)				GLI3	GLI family zinc finger 3		HLA-DQA1
AL020996.1	Uncharacterized protein	KMT2A	lysine (K)-specific methyltransferase 2A				GLIPR1L2	GLIPR1 like 2		HLA-DQA2
AL021546.6	Glutamyl-tRNA(Gln) amidotransferase subunit C, mitochondrial	KMT2D	lysine (K)-specific methyltransferase 2D				GLRA3	glycine receptor alpha 3		HMG20A
AL049840.1	Uncharacterized protein; cDNA FLJ53535	KNCN	kinocilin				GOLGA3	golgin A3		HMGCLL1
AL117190.3	Esophagus cancer-related gene-2 interaction susceptibility protein; Uncharacterized protein	KNOP1	lysine-rich nucleolar protein 1				GPC5	glypican 5		HNRNPU
AL136115.1	HCG2032337; PRO1848; Uncharacterized protein	KNSTRN	kinetochore-localized astrin/SPAG5 binding protein				GPR26	G protein-coupled receptor 26		HOXC5
AL136531.1	HCG2043693; Uncharacterized protein	KNTC1	kinetochore associated 1				GPX6	glutathione peroxidase 6		HP1BP3
AL161915.1	Uncharacterized protein	KPNA4	karyopherin alpha 4 (importin alpha 3)				GRHL2	grainyhead like transcription factor 2		HPSE2
AL356356.1	Protein LOC100996516	KPNB1	karyopherin (importin) beta 1				GSPT1	G1 to S phase transition 1		HS6ST3
AL441883.1	Uncharacterized protein	KPRP	keratinocyte proline-rich protein				GTDC1	glycosyltransferase like domain containing 1		HSPA13
AL583828.1		KRAS	Kirsten rat sarcoma viral oncogene homolog				GXYLT1	glucoside xylosyltransferase 1		IKZF2
AL591684.1	Protein LOC100996760	KRBA1	KRAB-A domain containing 1				HAS1	hyaluronan synthase 1		IL17RD
AL603965.1	Protein LOC100996760	KRBOX4	KRAB box domain containing 4				HECW2	HECT, C2 and WW domain containing E3 ubiquitin protein ligase 2		ILF2
AL626787.1		KRCC1	lysine-rich coiled-coil 1				HEG1	heart development protein with EGF like domains 1		INHBB
AL627309.1	Uncharacterized protein	KREMEN1	kringle containing transmembrane protein 1				HEXA	hexosaminidase subunit alpha		IQCJ
AL645728.1	Uncharacterized protein	KRT10	keratin 10				HKR1	HKR1, GLI-Kruppel zinc finger family member		IREB2
AL645730.2		KRT2	keratin 2				HLA-DOB	major histocompatibility complex, class II, DO beta		IRF2BP2
ALCAM	activated leukocyte cell adhesion molecule	KRT37	keratin 37				HLA-DQA1	major histocompatibility complex, class II, DQ alpha 1		ISOC1
ALDH1L2	aldehyde dehydrogenase 1 family, member L2	KRT4	keratin 4				HLA-DQA2	major histocompatibility complex, class II, DQ alpha 2		ITPK1
ALDH7A1	aldehyde dehydrogenase 7 family, member A1	KRT40	keratin 40				HMG20A	high mobility group 20A		KCNA4
ALDH8A1	aldehyde dehydrogenase 8 family, member A1	KRT71	keratin 71				HMGA2-AS1	HMGA2 antisense RNA 1		KCNB1
ALDOA	aldolase A, fructose-bisphosphate	KRT74	keratin 74				HMGCLL1	3-hydroxymethyl-3-methylglutaryl-CoA lyase like 1		KDM2A
ALG1	ALG1, chitobiosyldiphosphodolichol beta-mannosyltransferase	KRT76	keratin 76				HNRNPU	heterogeneous nuclear ribonucleoprotein U		KIAA1210
ALG11	ALG11, alpha-1,2-mannosyltransferase	KRT80	keratin 80				HOXC5	homeobox C5		KIF1B
ALG12	ALG12, alpha-1,6-mannosyltransferase	KRTAP10-11	keratin associated protein 10-11				HP1BP3	heterochromatin protein 1 binding protein 3		KITLG
ALG14	ALG14, UDP-N-acetylglucosaminyltransferase subunit	KRTAP10-3	keratin associated protein 10-3				HPSE2	heparanase 2 (inactive)		KLHDC3
ALG2	ALG2, alpha-1,3/1,6-mannosyltransferase	KRTAP10-5	keratin associated protein 10-5				HS6ST3	heparan sulfate 6-O-sulfotransferase 3		KRT37
ALG9	ALG9, alpha-1,2-mannosyltransferase	KRTAP10-7	keratin associated protein 10-7				HSPA13	heat shock protein family A (Hsp70) member 13		KRTAP4-11
ALKBH1	alkB, alkylation repair homolog 1 (E. coli)	KRTAP17-1	keratin associated protein 17-1				IKZF2	IKAROS family zinc finger 2		KSR2
ALKBH7	alkB, alkylation repair homolog 7 (E. coli)	KRTAP21-2	keratin associated protein 21-2				IL17RD	interleukin 17 receptor D		LAMB4
ALOXE3	arachidonate lipoxygenase 3	KRTAP22-2	keratin associated protein 22-2				ILF2	interleukin enhancer binding factor 2		LAMTOR3
ALPK3	alpha-kinase 3	KRTAP4-11	keratin associated protein 4-11				INHBB	inhibin subunit beta B		LEP
ALX1	ALX homeobox 1	KRTAP4-4	keratin associated protein 4-4				IQCJ	IQ motif containing J		LGI1
ALX4	ALX homeobox 4	KRTAP8-1	keratin associated protein 8-1				IREB2	iron responsive element binding protein 2		LHX2
AMD1	adenosylmethionine decarboxylase 1	KSR2	kinase suppressor of ras 2				IRF2BP2	interferon regulatory factor 2 binding protein 2		LIN9
AMER1	APC membrane recruitment protein 1	KTI12	KTI12 homolog, chromatin associated (S. cerevisiae)				ISOC1	isochorismatase domain containing 1		LITAF
AMER3	APC membrane recruitment protein 3	KY	kyphoscoliosis peptidase				ITPK1	inositol-tetrakisphosphate 1-kinase		LMCD1
AMIGO1	adhesion molecule with Ig-like domain 1	L2HGDH	L-2-hydroxyglutarate dehydrogenase				KCNA4	potassium voltage-gated channel subfamily A member 4		LRRC39
AMIGO2	adhesion molecule with Ig-like domain 2	L3MBTL3	l(3)mbt-like 3 (Drosophila)				KCNB1	potassium voltage-gated channel subfamily B member 1		LYSMD1
AMMECR1L	AMMECR1-like	LACE1	lactation elevated 1				KDM2A	lysine demethylase 2A		LYSMD3
AMOT	angiomotin	LAMB3	laminin, beta 3				KDM7A	lysine demethylase 7A		MAN1A1
AMZ1	archaelysin family metallopeptidase 1	LAMB4	laminin, beta 4				KIAA1210	KIAA1210		MAN1A2
AMZ2	archaelysin family metallopeptidase 2	LAMC1	laminin, gamma 1 (formerly LAMB2)				KIF1B	kinesin family member 1B		MAPK14
ANAPC13	anaphase promoting complex subunit 13	LAMP5	lysosomal-associated membrane protein family, member 5				KITLG	KIT ligand		MARCH5
ANAPC7	anaphase promoting complex subunit 7	LAMTOR3	late endosomal/lysosomal adaptor, MAPK and MTOR activator 3				KLHDC3	kelch domain containing 3		MBNL2
ANG	angiogenin, ribonuclease, RNase A family, 5	LANCL1	LanC lantibiotic synthetase component C-like 1 (bacterial)				KRT37	keratin 37		MBNL3
ANGPT4	angiopoietin 4	LANCL3	LanC lantibiotic synthetase component C-like 3 (bacterial)				KRTAP4-11	keratin associated protein 4-11		MCC
ANGPTL1	angiopoietin-like 1	LARP1	La ribonucleoprotein domain family, member 1				KSR2	kinase suppressor of ras 2		MED17
ANGPTL2	angiopoietin-like 2	LARP4B	La ribonucleoprotein domain family, member 4B				LAMB4	laminin subunit beta 4		MED29
ANGPTL7	angiopoietin-like 7	LASP1	LIM and SH3 protein 1				LAMTOR3	late endosomal/lysosomal adaptor, MAPK and MTOR activator 3		MEF2C
ANK2	ankyrin 2, neuronal	LBP	lipopolysaccharide binding protein				LEP	leptin		MEMO1
ANKFY1	ankyrin repeat and FYVE domain containing 1	LBX1	ladybird homeobox 1				LGI1	leucine rich glioma inactivated 1		MGA
ANKH	ANKH inorganic pyrophosphate transport regulator	LCA5	Leber congenital amaurosis 5				LHX2	LIM homeobox 2		MILR1
ANKRD12	ankyrin repeat domain 12	LCA5L	Leber congenital amaurosis 5-like				LIN9	lin-9 DREAM MuvB core complex component		MKX
ANKRD13A	ankyrin repeat domain 13A	LCE1C	late cornified envelope 1C				LITAF	lipopolysaccharide induced TNF factor		MMD2
ANKRD13C	ankyrin repeat domain 13C	LCOR	ligand dependent nuclear receptor corepressor				LMCD1	LIM and cysteine rich domains 1		MMP16
ANKRD20A1	ankyrin repeat domain 20 family, member A1	LCP2	lymphocyte cytosolic protein 2 (SH2 domain containing leukocyte protein of 76kDa)				LNPK	lunapark, ER junction formation factor		MON1B
ANKRD20A2	ankyrin repeat domain 20 family, member A2	LCT	lactase				LRRC39	leucine rich repeat containing 39		MPP7
ANKRD20A3	ankyrin repeat domain 20 family, member A3	LDOC1L	leucine zipper, down-regulated in cancer 1-like				LRRC74B	leucine rich repeat containing 74B		MSANTD3
ANKRD20A4	ankyrin repeat domain 20 family, member A4	LEP	leptin				LSM8	LSM8 homolog, U6 small nuclear RNA associated		MUC21
ANKRD26	ankyrin repeat domain 26	LEPREL1	leprecan-like 1				LYRM4	LYR motif containing 4		MXD1
ANKRD33B	ankyrin repeat domain 33B	LFNG	LFNG O-fucosylpeptide 3-beta-N-acetylglucosaminyltransferase				LYSMD1	LysM domain containing 1		MYOCD
ANKRD34B	ankyrin repeat domain 34B	LGI1	leucine-rich, glioma inactivated 1				LYSMD3	LysM domain containing 3		N4BP2L1
ANKRD39	ankyrin repeat domain 39	LGSN	lengsin, lens protein with glutamine synthetase domain				MAN1A1	mannosidase alpha class 1A member 1		NAMPT
ANKRD44	ankyrin repeat domain 44	LHFPL2	lipoma HMGIC fusion partner-like 2				MAN1A2	mannosidase alpha class 1A member 2		NDUFAF5
ANKRD45	ankyrin repeat domain 45	LHX2	LIM homeobox 2				MAP3K19	mitogen-activated protein kinase kinase kinase 19		NEGR1
ANKRD52	ankyrin repeat domain 52	LHX3	LIM homeobox 3				MAPK14	mitogen-activated protein kinase 14		NEURL1B
ANKRD53	ankyrin repeat domain 53	LHX4	LIM homeobox 4				MARCH5	membrane associated ring-CH-type finger 5		NEUROD1
ANKRD6	ankyrin repeat domain 6	LHX5	LIM homeobox 5				MBNL2	muscleblind like splicing regulator 2		NFATC2
ANKS1A	ankyrin repeat and sterile alpha motif domain containing 1A	LIG3	ligase III, DNA, ATP-dependent				MBNL3	muscleblind like splicing regulator 3		NFIA
ANKS4B	ankyrin repeat and sterile alpha motif domain containing 4B	LIMCH1	LIM and calponin homology domains 1				MCC	MCC, WNT signaling pathway regulator		NOL10
ANKS6	ankyrin repeat and sterile alpha motif domain containing 6	LIMD1	LIM domains containing 1				MED17	mediator complex subunit 17		NOVA2
ANLN	anillin, actin binding protein	LIMK1	LIM domain kinase 1				MED29	mediator complex subunit 29		NPC1
ANO5	anoctamin 5	LIMK2	LIM domain kinase 2				MEF2C	myocyte enhancer factor 2C		NR3C1
ANO8	anoctamin 8	LIN28A	lin-28 homolog A (C. elegans)				MEMO1	mediator of cell motility 1		NUDT16
ANTXR2	anthrax toxin receptor 2	LIN28B	lin-28 homolog B (C. elegans)				MGA	MGA, MAX dimerization protein		NUFIP1
ANXA6	annexin A6	LIN7A	lin-7 homolog A (C. elegans)				MIER1	MIER1 transcriptional regulator		OAS2
AP000679.2	Uncharacterized protein	LIN7C	lin-7 homolog C (C. elegans)				MILR1	mast cell immunoglobulin like receptor 1		OLA1
AP000708.1		LIN9	lin-9 homolog (C. elegans)				MKX	mohawk homeobox		OLFM3
AP000889.3	HCG2032453; Uncharacterized protein; cDNA FLJ25337 fis, clone TST00714	LINC00346	long intergenic non-protein coding RNA 346				MMD2	monocyte to macrophage differentiation associated 2		OLFM4
AP003774.4	HCG1652096, isoform CRA_a; Uncharacterized protein; cDNA FLJ37045 fis, clone BRACE2012185	LINC00999	long intergenic non-protein coding RNA 999				MMP16	matrix metallopeptidase 16		OR7D2
AP005482.1	Uncharacterized protein	LIPG	lipase, endothelial				MON1B	MON1 homolog B, secretory trafficking associated		PABPC4
AP1S1	adaptor-related protein complex 1, sigma 1 subunit	LIPT2	lipoyl(octanoyl) transferase 2 (putative)				MPP7	membrane palmitoylated protein 7		PAK6
AP1S3	adaptor-related protein complex 1, sigma 3 subunit	LITAF	lipopolysaccharide-induced TNF factor				MSANTD3	Myb/SANT DNA binding domain containing 3		PALM2
AP2B1	adaptor-related protein complex 2, beta 1 subunit	LL22NC03-63E9.3	Uncharacterized protein				MTFR1	mitochondrial fission regulator 1		PATE2
AP3M1	adaptor-related protein complex 3, mu 1 subunit	LMAN1	lectin, mannose-binding, 1				MUC21	mucin 21, cell surface associated		PAX5
AP3M2	adaptor-related protein complex 3, mu 2 subunit	LMAN2L	lectin, mannose-binding 2-like				MXD1	MAX dimerization protein 1		PCYOX1L
AP4S1	adaptor-related protein complex 4, sigma 1 subunit	LMBR1	limb development membrane protein 1				MYOCD	myocardin		PDZD2
AP5B1	adaptor-related protein complex 5, beta 1 subunit	LMCD1	LIM and cysteine-rich domains 1				N4BP2L1	NEDD4 binding protein 2 like 1		PHEX
AP5M1	adaptor-related protein complex 5, mu 1 subunit	LMF1	lipase maturation factor 1				NAMPT	nicotinamide phosphoribosyltransferase		PHF8
AP5S1	adaptor-related protein complex 5, sigma 1 subunit	LMO3	LIM domain only 3 (rhombotin-like 2)				NDUFAF5	NADH:ubiquinone oxidoreductase complex assembly factor 5		PIAS2
APAF1	apoptotic peptidase activating factor 1	LMOD1	leiomodin 1 (smooth muscle)				NEGR1	neuronal growth regulator 1		PIGK
APEX2	APEX nuclease (apurinic/apyrimidinic endonuclease) 2	LMOD2	leiomodin 2 (cardiac)				NEURL1B	neuralized E3 ubiquitin protein ligase 1B		PIK3CA
APH1A	APH1A gamma secretase subunit	LMOD3	leiomodin 3 (fetal)				NEUROD1	neuronal differentiation 1		PIK3CB
APLNR	apelin receptor	LMTK2	lemur tyrosine kinase 2				NFATC2	nuclear factor of activated T cells 2		PIP4K2B
APLP2	amyloid beta (A4) precursor-like protein 2	LMX1B	LIM homeobox transcription factor 1, beta				NFIA	nuclear factor I A		PITPNB
APOA1	apolipoprotein A-I	LNPEP	leucyl/cystinyl aminopeptidase				NOL10	nucleolar protein 10		PLCD4
APOA5	apolipoprotein A-V	LOH12CR1	loss of heterozygosity, 12, chromosomal region 1				NOVA2	NOVA alternative splicing regulator 2		PLCL2
APOBEC3A	apolipoprotein B mRNA editing enzyme, catalytic polypeptide-like 3A	LONRF2	LON peptidase N-terminal domain and ring finger 2				NPC1	NPC intracellular cholesterol transporter 1		PLXNA4
APOBEC3B	apolipoprotein B mRNA editing enzyme, catalytic polypeptide-like 3B	LONRF3	LON peptidase N-terminal domain and ring finger 3				NR3C1	nuclear receptor subfamily 3 group C member 1		POLI
APOBEC3C	apolipoprotein B mRNA editing enzyme, catalytic polypeptide-like 3C	LPAR2	lysophosphatidic acid receptor 2				NUDT16	nudix hydrolase 16		POU2F3
APOBEC3G	apolipoprotein B mRNA editing enzyme, catalytic polypeptide-like 3G	LPGAT1	lysophosphatidylglycerol acyltransferase 1				NUFIP1	nuclear FMR1 interacting protein 1		PPP3R1
APOC3	apolipoprotein C-III	LPHN1	latrophilin 1				NUP98	nucleoporin 98		PROM2
APOC4	apolipoprotein C-IV	LPHN3	latrophilin 3				OAS2	2'-5'-oligoadenylate synthetase 2		PRR23C
APOL3	apolipoprotein L, 3	LPIN1	lipin 1				OLA1	Obg like ATPase 1		PRSS37
APOLD1	apolipoprotein L domain containing 1	LPL	lipoprotein lipase				OLFM3	olfactomedin 3		PSMB2
APOOL	apolipoprotein O-like	LPP	LIM domain containing preferred translocation partner in lipoma				OLFM4	olfactomedin 4		PTPN18
APOPT1	apoptogenic 1, mitochondrial	LPPR1	Lipid phosphate phosphatase-related protein type 1				OPN5	opsin 5		PTPRT
APP	amyloid beta (A4) precursor protein	LPXN	leupaxin				OR7D2	olfactory receptor family 7 subfamily D member 2		RAB30
APPBP2	amyloid beta precursor protein (cytoplasmic tail) binding protein 2	LRBA	LPS-responsive vesicle trafficking, beach and anchor containing				OTULINL	OTU deubiquitinase with linear linkage specificity like		RABGAP1L
APPL1	adaptor protein, phosphotyrosine interaction, PH domain and leucine zipper containing 1	LRCH3	leucine-rich repeats and calponin homology (CH) domain containing 3				PABPC4	poly(A) binding protein cytoplasmic 4		RAG1
APRT	adenine phosphoribosyltransferase	LRG1	leucine-rich alpha-2-glycoprotein 1				PAK6	p21 (RAC1) activated kinase 6		RASAL2
AQP10	aquaporin 10	LRIF1	ligand dependent nuclear receptor interacting factor 1				PALM2	paralemmin 2		RBBP9
AQP11	aquaporin 11	LRIG3	leucine-rich repeats and immunoglobulin-like domains 3				PATE2	prostate and testis expressed 2		RBFOX2
AQP2	aquaporin 2 (collecting duct)	LRIT2	leucine-rich repeat, immunoglobulin-like and transmembrane domains 2				PAX5	paired box 5		RBM46
AQP9	aquaporin 9	LRP10	low density lipoprotein receptor-related protein 10				PCYOX1L	prenylcysteine oxidase 1 like		RBMXL1
AR	androgen receptor	LRP2BP	LRP2 binding protein				PDE1C	phosphodiesterase 1C		RBPMS
ARAF	v-raf murine sarcoma 3611 viral oncogene homolog	LRP4	low density lipoprotein receptor-related protein 4				PDZD2	PDZ domain containing 2		REG1B
ARAP1	ArfGAP with RhoGAP domain, ankyrin repeat and PH domain 1	LRP6	low density lipoprotein receptor-related protein 6				PHEX	phosphate regulating endopeptidase homolog X-linked		REPS2
ARF3	ADP-ribosylation factor 3	LRPAP1	low density lipoprotein receptor-related protein associated protein 1				PHF8	PHD finger protein 8		RFC5
ARF6	ADP-ribosylation factor 6	LRPPRC	leucine-rich pentatricopeptide repeat containing				PIAS2	protein inhibitor of activated STAT 2		RGS7
ARFGAP1	ADP-ribosylation factor GTPase activating protein 1	LRRC1	leucine rich repeat containing 1				PIGK	phosphatidylinositol glycan anchor biosynthesis class K		RHOQ
ARFGEF2	ADP-ribosylation factor guanine nucleotide-exchange factor 2 (brefeldin A-inhibited)	LRRC15	leucine rich repeat containing 15				PIK3CA	phosphatidylinositol-4,5-bisphosphate 3-kinase catalytic subunit alpha		RNF6
ARFIP2	ADP-ribosylation factor interacting protein 2	LRRC2	leucine rich repeat containing 2				PIK3CB	phosphatidylinositol-4,5-bisphosphate 3-kinase catalytic subunit beta		SAP130
ARGFX	arginine-fifty homeobox	LRRC20	leucine rich repeat containing 20				PIKFYVE	phosphoinositide kinase, FYVE-type zinc finger containing		SARM1
ARHGAP17	Rho GTPase activating protein 17	LRRC25	leucine rich repeat containing 25				PIP4K2B	phosphatidylinositol-5-phosphate 4-kinase type 2 beta		SDC4
ARHGAP19-SLIT1	ARHGAP19-SLIT1 readthrough (NMD candidate)	LRRC27	leucine rich repeat containing 27				PITPNB	phosphatidylinositol transfer protein beta		SDF2
ARHGAP22	Rho GTPase activating protein 22	LRRC29	leucine rich repeat containing 29				PLCD4	phospholipase C delta 4		SEC22A
ARHGAP25	Rho GTPase activating protein 25	LRRC31	leucine rich repeat containing 31				PLCL2	phospholipase C like 2		SEC22C
ARHGAP26	Rho GTPase activating protein 26	LRRC32	leucine rich repeat containing 32				PLXNA4	plexin A4		SEMA6A
ARHGAP29	Rho GTPase activating protein 29	LRRC34	leucine rich repeat containing 34				POLI	DNA polymerase iota		SENP5
ARHGAP30	Rho GTPase activating protein 30	LRRC38	leucine rich repeat containing 38				POLR3C	RNA polymerase III subunit C		SEPT11.
ARHGAP32	Rho GTPase activating protein 32	LRRC39	leucine rich repeat containing 39				POU2F3	POU class 2 homeobox 3		SET
ARHGAP40	Rho GTPase activating protein 40	LRRC40	leucine rich repeat containing 40				PPP3R1	protein phosphatase 3 regulatory subunit B, alpha		SFMBT2
ARHGAP44	Rho GTPase activating protein 44	LRRCC1	leucine rich repeat and coiled-coil centrosomal protein 1				PROM2	prominin 2		SGMS1
ARHGAP5	Rho GTPase activating protein 5	LRRD1	leucine-rich repeats and death domain containing 1				PRR23C	proline rich 23C		SH2D4B
ARHGEF15	Rho guanine nucleotide exchange factor (GEF) 15	LRRFIP2	leucine rich repeat (in FLII) interacting protein 2				PRR29	proline rich 29		SH3BGRL2
ARHGEF16	Rho guanine nucleotide exchange factor (GEF) 16	LRRK1	leucine-rich repeat kinase 1				PRSS37	serine protease 37		SH3PXD2A
ARHGEF2	Rho/Rac guanine nucleotide exchange factor (GEF) 2	LRRN2	leucine rich repeat neuronal 2				PSMB2	proteasome subunit beta 2		SHISA3
ARHGEF33	Rho guanine nucleotide exchange factor (GEF) 33	LRRTM2	leucine rich repeat transmembrane neuronal 2				PTPN18	protein tyrosine phosphatase, non-receptor type 18		SHISA6
ARHGEF37	Rho guanine nucleotide exchange factor (GEF) 37	LSAMP	limbic system-associated membrane protein				PTPRT	protein tyrosine phosphatase, receptor type T		SHISA9
ARHGEF4	Rho guanine nucleotide exchange factor (GEF) 4	LSG1	large 60S subunit nuclear export GTPase 1				PWWP3B	PWWP domain containing 3B		SLC17A8
ARHGEF9	Cdc42 guanine nucleotide exchange factor (GEF) 9	LSM3	LSM3 homolog, U6 small nuclear RNA associated (S. cerevisiae)				RAB30	RAB30, member RAS oncogene family		SLC1A1
ARID1B	AT rich interactive domain 1B (SWI1-like)	LSM6	LSM6 homolog, U6 small nuclear RNA associated (S. cerevisiae)				RABGAP1L	RAB GTPase activating protein 1 like		SLC1A2
ARID5B	AT rich interactive domain 5B (MRF1-like)	LTBP2	latent transforming growth factor beta binding protein 2				RAG1	recombination activating 1		SLC24A2
ARL10	ADP-ribosylation factor-like 10	LTBP4	latent transforming growth factor beta binding protein 4				RASAL2	RAS protein activator like 2		SLC25A37
ARL11	ADP-ribosylation factor-like 11	LTBR	lymphotoxin beta receptor (TNFR superfamily, member 3)				RBBP9	RB binding protein 9, serine hydrolase		SLC25A38
ARL14EP	ADP-ribosylation factor-like 14 effector protein	LTF	lactotransferrin				RBFOX2	RNA binding fox-1 homolog 2		SLC25A43
ARL5A	ADP-ribosylation factor-like 5A	LUC7L	LUC7-like (S. cerevisiae)				RBM46	RNA binding motif protein 46		SLC2A13
ARL6	ADP-ribosylation factor-like 6	LUC7L2	LUC7-like 2 (S. cerevisiae)				RBMXL1	RBMX like 1		SLC2A4RG
ARL8B	ADP-ribosylation factor-like 8B	LY6G5B	lymphocyte antigen 6 complex, locus G5B				RBPMS	RNA binding protein, mRNA processing factor		SLC35F1
ARMC3	armadillo repeat containing 3	LY6H	lymphocyte antigen 6 complex, locus H				REG1B	regenerating family member 1 beta		SLC39A8
ARMC7	armadillo repeat containing 7	LY6K	lymphocyte antigen 6 complex, locus K				REPS2	RALBP1 associated Eps domain containing 2		SLITRK2
ARNT	aryl hydrocarbon receptor nuclear translocator	LY75	lymphocyte antigen 75				RFC5	replication factor C subunit 5		SMCO4
ARNT2	aryl-hydrocarbon receptor nuclear translocator 2	LY75-CD302	LY75-CD302 readthrough				RGS7	regulator of G protein signaling 7		SMIM19
ARPP19	cAMP-regulated phosphoprotein, 19kDa	LYN	v-yes-1 Yamaguchi sarcoma viral related oncogene homolog				RHOQ	ras homolog family member Q		SMIM8
ARRB1	arrestin, beta 1	LYNX1	Ly6/neurotoxin 1				RNF6	ring finger protein 6		SNX20
ARSA	arylsulfatase A	LYPD5	LY6/PLAUR domain containing 5				SAP130	Sin3A associated protein 130		SORL1
ARSB	arylsulfatase B	LYPLA1	lysophospholipase I				SARM1	sterile alpha and TIR motif containing 1		SOS1
ARSD	arylsulfatase D	LYRM2	LYR motif containing 2				SDC4	syndecan 4		SPN
ARSE	arylsulfatase E (chondrodysplasia punctata 1)	LYSMD1	LysM, putative peptidoglycan-binding, domain containing 1				SDF2	stromal cell derived factor 2		SPOPL
ARSG	arylsulfatase G	LYSMD3	LysM, putative peptidoglycan-binding, domain containing 3				SEC22A	SEC22 homolog A, vesicle trafficking protein		SPTBN1
ARSI	arylsulfatase family, member I	LYST	lysosomal trafficking regulator				SEC22C	SEC22 homolog C, vesicle trafficking protein		SRD5A3
ASAH1	N-acylsphingosine amidohydrolase (acid ceramidase) 1	LYZ	lysozyme				SEMA6A	semaphorin 6A		ST8SIA6
ASB10	ankyrin repeat and SOCS box containing 10	LZTFL1	leucine zipper transcription factor-like 1				SENP5	SUMO specific peptidase 5		STAT2
ASB13	ankyrin repeat and SOCS box containing 13	LZTS1	leucine zipper, putative tumor suppressor 1				SEPT11.	septin 11		STAU1
ASB16	ankyrin repeat and SOCS box containing 16	MAATS1	MYCBP-associated, testis expressed 1				SET	SET nuclear proto-oncogene		STEAP2
ASB2	ankyrin repeat and SOCS box containing 2	MAG	myelin associated glycoprotein				SFMBT2	Scm like with four mbt domains 2		STK4
ASB7	ankyrin repeat and SOCS box containing 7	MAGEB10	melanoma antigen family B, 10				SGMS1	sphingomyelin synthase 1		STOML3
ASCC1	activating signal cointegrator 1 complex subunit 1	MALL	mal, T-cell differentiation protein-like				SH2D4B	SH2 domain containing 4B		STON2
ASH2L	ash2 (absent, small, or homeotic)-like (Drosophila)	MAN1A1	mannosidase, alpha, class 1A, member 1				SH3BGRL2	SH3 domain binding glutamate rich protein like 2		STX12
ASPSCR1	alveolar soft part sarcoma chromosome region, candidate 1	MAN1A2	mannosidase, alpha, class 1A, member 2				SH3PXD2A	SH3 and PX domains 2A		SUZ12
ASRGL1	asparaginase like 1	MAP1A	microtubule-associated protein 1A				SHISA3	shisa family member 3		SYN1
ASTN1	astrotactin 1	MAP1B	microtubule-associated protein 1B				SHISA6	shisa family member 6		SYNJ1
ASXL1	additional sex combs like 1 (Drosophila)	MAP2K6	mitogen-activated protein kinase kinase 6				SHISA9	shisa family member 9		SYT11
ATAD2B	ATPase family, AAA domain containing 2B	MAP3K2	mitogen-activated protein kinase kinase kinase 2				SLC17A8	solute carrier family 17 member 8		TAF2
ATAD3C	ATPase family, AAA domain containing 3C	MAP3K3	mitogen-activated protein kinase kinase kinase 3				SLC1A1	solute carrier family 1 member 1		TBC1D26
ATF6	activating transcription factor 6	MAP4	microtubule-associated protein 4				SLC1A2	solute carrier family 1 member 2		TBC1D30
ATF7IP	activating transcription factor 7 interacting protein	MAP4K2	mitogen-activated protein kinase kinase kinase kinase 2				SLC24A2	solute carrier family 24 member 2		TCF20
ATG13	autophagy related 13	MAP7D2	MAP7 domain containing 2				SLC25A37	solute carrier family 25 member 37		TESC
ATG2A	autophagy related 2A	MAPK1	mitogen-activated protein kinase 1				SLC25A38	solute carrier family 25 member 38		TET3
ATG4B	autophagy related 4B, cysteine peptidase	MAPK10	mitogen-activated protein kinase 10				SLC25A43	solute carrier family 25 member 43		THOC5
ATHL1	ATH1, acid trehalase-like 1 (yeast)	MAPK14	mitogen-activated protein kinase 14				SLC2A13	solute carrier family 2 member 13		THSD7A
ATM	ataxia telangiectasia mutated	MAPK4	mitogen-activated protein kinase 4				SLC2A4RG	SLC2A4 regulator		TJP1
ATOH8	atonal homolog 8 (Drosophila)	MAPK8IP2	mitogen-activated protein kinase 8 interacting protein 2				SLC35F1	solute carrier family 35 member F1		TMEM136
ATP10D	ATPase, class V, type 10D	MAPKAPK2	mitogen-activated protein kinase-activated protein kinase 2				SLC39A8	solute carrier family 39 member 8		TMEM167A
ATP11A	ATPase, class VI, type 11A	MAPRE2	microtubule-associated protein, RP/EB family, member 2				SLITRK2	SLIT and NTRK like family member 2		TMEM183A
ATP12A	ATPase, H+/K+ transporting, nongastric, alpha polypeptide	MAPT	microtubule-associated protein tau				SMCO4	single-pass membrane protein with coiled-coil domains 4		TMEM236
ATP13A3	ATPase type 13A3	MARC1	mitochondrial amidoxime reducing component 1				SMIM19	small integral membrane protein 19		TMEM242
ATP1A2	ATPase, Na+/K+ transporting, alpha 2 polypeptide	MARCH3	membrane-associated ring finger (C3HC4) 3, E3 ubiquitin protein ligase				SMIM8	small integral membrane protein 8		TMEM43
ATP1B3	ATPase, Na+/K+ transporting, beta 3 polypeptide	MARCH4	membrane-associated ring finger (C3HC4) 4, E3 ubiquitin protein ligase				SNX20	sorting nexin 20		TMLHE
ATP2B1	ATPase, Ca++ transporting, plasma membrane 1	MARCH5	membrane-associated ring finger (C3HC4) 5				SORL1	sortilin related receptor 1		TNFSF13B
ATP2B2	ATPase, Ca++ transporting, plasma membrane 2	MARCH6	membrane-associated ring finger (C3HC4) 6, E3 ubiquitin protein ligase				SOS1	SOS Ras/Rac guanine nucleotide exchange factor 1		TPD52L1
ATP2B4	ATPase, Ca++ transporting, plasma membrane 4	MARCH9	membrane-associated ring finger (C3HC4) 9				SPN	sialophorin		TPGS2
ATP5F1	ATP synthase, H+ transporting, mitochondrial Fo complex, subunit B1	MARK3	MAP/microtubule affinity-regulating kinase 3				SPOPL	speckle type BTB/POZ protein like		TRIP6
ATP5G1	ATP synthase, H+ transporting, mitochondrial Fo complex, subunit C1 (subunit 9)	MARK4	MAP/microtubule affinity-regulating kinase 4				SPTBN1	spectrin beta, non-erythrocytic 1		TRNAU1AP
ATP5G3	ATP synthase, H+ transporting, mitochondrial Fo complex, subunit C3 (subunit 9)	MARVELD1	MARVEL domain containing 1				SRD5A3	steroid 5 alpha-reductase 3		TRPM3
ATP5J2-PTCD1	ATP5J2-PTCD1 readthrough	MASP1	mannan-binding lectin serine peptidase 1 (C4/C2 activating component of Ra-reactive factor)				ST8SIA6	ST8 alpha-N-acetyl-neuraminide alpha-2,8-sialyltransferase 6		TUBB
ATP6V1B2	ATPase, H+ transporting, lysosomal 56/58kDa, V1 subunit B2	MATN1	matrilin 1, cartilage matrix protein				STAT2	signal transducer and activator of transcription 2		TVP23C-CDRT4
ATP6V1G2	ATPase, H+ transporting, lysosomal 13kDa, V1 subunit G2	MB	myoglobin				STAU1	staufen double-stranded RNA binding protein 1		TXNDC17
ATP7B	ATPase, Cu++ transporting, beta polypeptide	MBD3	methyl-CpG binding domain protein 3				STEAP2	STEAP2 metalloreductase		UBAP2
ATP9A	ATPase, class II, type 9A	MBD5	methyl-CpG binding domain protein 5				STK4	serine/threonine kinase 4		UBASH3B
ATPIF1	ATPase inhibitory factor 1	MBNL2	muscleblind-like splicing regulator 2				STOML3	stomatin like 3		UBE2B
ATRNL1	attractin-like 1	MBNL3	muscleblind-like splicing regulator 3				STON2	stonin 2		UBE2G1
ATRX	alpha thalassemia/mental retardation syndrome X-linked	MBOAT2	membrane bound O-acyltransferase domain containing 2				STX12	syntaxin 12		UBE3B
ATXN1	ataxin 1	MBP	myelin basic protein				SUZ12	SUZ12, polycomb repressive complex 2 subunit		UBL3
ATXN3	ataxin 3	MBTD1	mbt domain containing 1				SYN1	synapsin I		UEVLD
ATXN7L1	ataxin 7-like 1	MBTPS2	membrane-bound transcription factor peptidase, site 2				SYNJ1	synaptojanin 1		ULBP3
AURKB	aurora kinase B	MC2R	melanocortin 2 receptor (adrenocorticotropic hormone)				SYT11	synaptotagmin 11		UNC45B
AVL9	AVL9 homolog (S. cerevisiase)	MCC	mutated in colorectal cancers				TAF2	TATA-box binding protein associated factor 2		UNC5CL
AVPR1A	arginine vasopressin receptor 1A	MCCC2	methylcrotonoyl-CoA carboxylase 2 (beta)				TBC1D26	TBC1 domain family member 26		UNC5D
AWAT2	acyl-CoA wax alcohol acyltransferase 2	MCF2L2	MCF.2 cell line derived transforming sequence-like 2				TBC1D30	TBC1 domain family member 30		URM1
AZGP1	alpha-2-glycoprotein 1, zinc-binding	MCHR1	melanin-concentrating hormone receptor 1				TCAIM	T cell activation inhibitor, mitochondrial		USP31
AZIN1	antizyme inhibitor 1	MCHR2	melanin-concentrating hormone receptor 2				TCF20	transcription factor 20		USP38
B3GALNT1	beta-1,3-N-acetylgalactosaminyltransferase 1 (globoside blood group)	MCM2	minichromosome maintenance complex component 2				TESC	tescalcin		USP6NL
B3GALNT2	beta-1,3-N-acetylgalactosaminyltransferase 2	MCM3AP	minichromosome maintenance complex component 3 associated protein				TET3	tet methylcytosine dioxygenase 3		UTP23
B3GALT2	UDP-Gal:betaGlcNAc beta 1,3-galactosyltransferase, polypeptide 2	MCM5	minichromosome maintenance complex component 5				THOC5	THO complex 5		VPS53
B3GALT5	UDP-Gal:betaGlcNAc beta 1,3-galactosyltransferase, polypeptide 5	MCM7	minichromosome maintenance complex component 7				THSD7A	thrombospondin type 1 domain containing 7A		WBP2NL
B3GALTL	beta 1,3-galactosyltransferase-like	MCM8	minichromosome maintenance complex component 8				TJP1	tight junction protein 1		WDFY3
B3GAT2	beta-1,3-glucuronyltransferase 2 (glucuronosyltransferase S)	MCOLN2	mucolipin 2				TMEM136	transmembrane protein 136		WWC1
B3GNT6	UDP-GlcNAc:betaGal beta-1,3-N-acetylglucosaminyltransferase 6 (core 3 synthase)	MCPH1	microcephalin 1				TMEM167A	transmembrane protein 167A		XIRP1
B4GALT1	UDP-Gal:betaGlcNAc beta 1,4- galactosyltransferase, polypeptide 1	MCTS1	malignant T cell amplified sequence 1				TMEM183A	transmembrane protein 183A		XKR6
B4GALT2	UDP-Gal:betaGlcNAc beta 1,4- galactosyltransferase, polypeptide 2	MDM2	MDM2 oncogene, E3 ubiquitin protein ligase				TMEM183B	transmembrane protein 183B		XKR9
BAAT	bile acid CoA: amino acid N-acyltransferase (glycine N-choloyltransferase)	MDM4	Mdm4 p53 binding protein homolog (mouse)				TMEM236	transmembrane protein 236		YTHDC1
BACE1	beta-site APP-cleaving enzyme 1	MEAF6	MYST/Esa1-associated factor 6				TMEM242	transmembrane protein 242		YWHAQ
BACE2	beta-site APP-cleaving enzyme 2	MECP2	methyl CpG binding protein 2 (Rett syndrome)				TMEM43	transmembrane protein 43		ZBTB20
BACH1	BTB and CNC homology 1, basic leucine zipper transcription factor 1	MED16	mediator complex subunit 16				TMLHE	trimethyllysine hydroxylase, epsilon		ZC3H12D
BACH2	BTB and CNC homology 1, basic leucine zipper transcription factor 2	MED17	mediator complex subunit 17				TNFSF13B	TNF superfamily member 13b		ZCCHC14
BAG2	BCL2-associated athanogene 2	MED21	mediator complex subunit 21				TOR1AIP2	torsin 1A interacting protein 2		ZDHHC15
BAZ2A	bromodomain adjacent to zinc finger domain, 2A	MED23	mediator complex subunit 23				TPD52L1	TPD52 like 1		ZFP30
BAZ2B	bromodomain adjacent to zinc finger domain, 2B	MED29	mediator complex subunit 29				TPGS2	tubulin polyglutamylase complex subunit 2		ZIC5
BBOX1	butyrobetaine (gamma), 2-oxoglutarate dioxygenase (gamma-butyrobetaine hydroxylase) 1	MED7	mediator complex subunit 7				TRIP6	thyroid hormone receptor interactor 6		ZNF101
BCAP29	B-cell receptor-associated protein 29	MED9	mediator complex subunit 9				TRNAU1AP	tRNA selenocysteine 1 associated protein 1		ZNF251
BCAP31	B-cell receptor-associated protein 31	MEDAG	mesenteric estrogen-dependent adipogenesis				TRPM3	transient receptor potential cation channel subfamily M member 3		ZNF286A
BCAS1	breast carcinoma amplified sequence 1	MEF2C	myocyte enhancer factor 2C				TUBB	tubulin beta class I		ZNF286B
BCAS3	breast carcinoma amplified sequence 3	MEGF9	multiple EGF-like-domains 9				TVP23C-CDRT4	TVP23C-CDRT4 readthrough		ZNF385D
BCAT1	branched chain amino-acid transaminase 1, cytosolic	MEI4	meiosis-specific 4 homolog (S. cerevisiae)				TXNDC17	thioredoxin domain containing 17		ZNF397
BCDIN3D	BCDIN3 domain containing	MEIS2	Meis homeobox 2				TXNRD2	thioredoxin reductase 2		ZNF546
BCL10	B-cell CLL/lymphoma 10	MEIS3	Meis homeobox 3				UBAP2	ubiquitin associated protein 2		ZNF561
BCL11B	B-cell CLL/lymphoma 11B (zinc finger protein)	MELK	maternal embryonic leucine zipper kinase				UBASH3B	ubiquitin associated and SH3 domain containing B		ZNF562
BCL2L13	BCL2-like 13 (apoptosis facilitator)	MEMO1	mediator of cell motility 1				UBE2B	ubiquitin conjugating enzyme E2 B		ZNF618
BCL2L2	BCL2-like 2	MEOX1	mesenchyme homeobox 1				UBE2G1	ubiquitin conjugating enzyme E2 G1		ZNF621
BCL7A	B-cell CLL/lymphoma 7A	METAP1	methionyl aminopeptidase 1				UBE3B	ubiquitin protein ligase E3B		ZNF665
BDKRB2	bradykinin receptor B2	METTL15	methyltransferase like 15				UBL3	ubiquitin like 3		ZNF704
BDP1	B double prime 1, subunit of RNA polymerase III transcription initiation factor IIIB	METTL22	methyltransferase like 22				UEVLD	UEV and lactate/malate dehyrogenase domains		ZNF747
BEND4	BEN domain containing 4	METTL24	methyltransferase like 24				ULBP3	UL16 binding protein 3
BET1L	Bet1 golgi vesicular membrane trafficking protein-like	METTL2B	methyltransferase like 2B				ULK4	unc-51 like kinase 4
BEX4	brain expressed, X-linked 4	METTL4	methyltransferase like 4				UNC45B	unc-45 myosin chaperone B
BHLHA15	basic helix-loop-helix family, member a15	METTL8	methyltransferase like 8				UNC5CL	unc-5 family C-terminal like
BHLHE41	basic helix-loop-helix family, member e41	METTL9	methyltransferase like 9				UNC5D	unc-5 netrin receptor D
BHMT	betaine--homocysteine S-methyltransferase	MFAP5	microfibrillar associated protein 5				URM1	ubiquitin related modifier 1
BHMT2	betaine--homocysteine S-methyltransferase 2	MFN2	mitofusin 2				USP31	ubiquitin specific peptidase 31
BICD1	bicaudal D homolog 1 (Drosophila)	MFSD1	major facilitator superfamily domain containing 1				USP38	ubiquitin specific peptidase 38
BICD2	bicaudal D homolog 2 (Drosophila)	MFSD12	major facilitator superfamily domain containing 12				USP6NL	USP6 N-terminal like
BLOC1S6	biogenesis of lysosomal organelles complex-1, subunit 6, pallidin	MFSD6	major facilitator superfamily domain containing 6				UTP23	UTP23, small subunit processome component
BMP10	bone morphogenetic protein 10	MFSD8	major facilitator superfamily domain containing 8				VPS53	VPS53, GARP complex subunit
BMP2	bone morphogenetic protein 2	MFSD9	major facilitator superfamily domain containing 9				WBP2NL	WBP2 N-terminal like
BMP8B	bone morphogenetic protein 8b	MGA	MGA, MAX dimerization protein				WDFY3	WD repeat and FYVE domain containing 3
BMPR1A	bone morphogenetic protein receptor, type IA	MGAT4A	mannosyl (alpha-1,3-)-glycoprotein beta-1,4-N-acetylglucosaminyltransferase, isozyme A				WWC1	WW and C2 domain containing 1
BMPR2	bone morphogenetic protein receptor, type II (serine/threonine kinase)	MGAT5	mannosyl (alpha-1,6-)-glycoprotein beta-1,6-N-acetyl-glucosaminyltransferase				XIRP1	xin actin binding repeat containing 1
BMS1	BMS1 ribosome biogenesis factor	MIA3	melanoma inhibitory activity family, member 3				XKR6	XK related 6
BNC2	basonuclin 2	MIB1	mindbomb E3 ubiquitin protein ligase 1				XKR9	XK related 9
BNIP2	BCL2/adenovirus E1B 19kDa interacting protein 2	MICA	MHC class I polypeptide-related sequence A				YTHDC1	YTH domain containing 1
BOD1	biorientation of chromosomes in cell division 1	MICAL2	microtubule associated monooxygenase, calponin and LIM domain containing 2				YWHAQ	tyrosine 3-monooxygenase/tryptophan 5-monooxygenase activation protein theta
BOK	BCL2-related ovarian killer	MID2	midline 2				ZBTB20	zinc finger and BTB domain containing 20
BPGM	2,3-bisphosphoglycerate mutase	MILR1	mast cell immunoglobulin-like receptor 1				ZC3H12D	zinc finger CCCH-type containing 12D
BRD1	bromodomain containing 1	MINOS1	mitochondrial inner membrane organizing system 1				ZCCHC14	zinc finger CCHC-type containing 14
BRD9	bromodomain containing 9	MINOS1-NBL1	MINOS1-NBL1 readthrough				ZDHHC15	zinc finger DHHC-type containing 15
BRIP1	BRCA1 interacting protein C-terminal helicase 1	MINPP1	multiple inositol-polyphosphate phosphatase 1				ZFP30	ZFP30 zinc finger protein
BRMS1L	breast cancer metastasis-suppressor 1-like	MIXL1	Mix paired-like homeobox				ZIC5	Zic family member 5
BRWD1	bromodomain and WD repeat domain containing 1	MKI67	antigen identified by monoclonal antibody Ki-67				ZNF101	zinc finger protein 101
BRWD3	bromodomain and WD repeat domain containing 3	MKKS	McKusick-Kaufman syndrome				ZNF135	zinc finger protein 135
BSN	bassoon presynaptic cytomatrix protein	MKL2	MKL/myocardin-like 2				ZNF251	zinc finger protein 251
BSND	Bartter syndrome, infantile, with sensorineural deafness (Barttin)	MKLN1	muskelin 1, intracellular mediator containing kelch motifs				ZNF286A	zinc finger protein 286A
BST1	bone marrow stromal cell antigen 1	MKRN2	makorin ring finger protein 2				ZNF286B	zinc finger protein 286B
BTAF1	BTAF1 RNA polymerase II, B-TFIID transcription factor-associated, 170kDa	MKX	mohawk homeobox				ZNF385D	zinc finger protein 385D
BTBD10	BTB (POZ) domain containing 10	MLEC	malectin				ZNF397	zinc finger protein 397
BTBD7	BTB (POZ) domain containing 7	MLF1	myeloid leukemia factor 1				ZNF546	zinc finger protein 546
BTBD9	BTB (POZ) domain containing 9	MLIP	muscular LMNA-interacting protein				ZNF561	zinc finger protein 561
BTD	biotinidase	MLLT1	myeloid/lymphoid or mixed-lineage leukemia (trithorax homolog, Drosophila); translocated to, 1				ZNF562	zinc finger protein 562
BTF3	basic transcription factor 3	MLLT3	myeloid/lymphoid or mixed-lineage leukemia (trithorax homolog, Drosophila); translocated to, 3				ZNF618	zinc finger protein 618
BTF3L4	basic transcription factor 3-like 4	MLLT6	myeloid/lymphoid or mixed-lineage leukemia (trithorax homolog, Drosophila); translocated to, 6				ZNF621	zinc finger protein 621
BTLA	B and T lymphocyte associated	MLX	MLX, MAX dimerization protein				ZNF665	zinc finger protein 665
BTRC	beta-transducin repeat containing E3 ubiquitin protein ligase	MLXIP	MLX interacting protein				ZNF704	zinc finger protein 704
BYSL	bystin-like	MMD	monocyte to macrophage differentiation-associated				ZNF747	zinc finger protein 747
BZRAP1	benzodiazapine receptor (peripheral) associated protein 1	MMD2	monocyte to macrophage differentiation-associated 2
C10orf105	chromosome 10 open reading frame 105	MMGT1	membrane magnesium transporter 1
C10orf115	chromosome 10 open reading frame 115	MMP16	matrix metallopeptidase 16 (membrane-inserted)
C10orf118	chromosome 10 open reading frame 118	MMP8	matrix metallopeptidase 8 (neutrophil collagenase)				GOLGA8B	golgin A8 family, member B	SLC2A4RG	SLC2A4 regulator
C10orf126	chromosome 10 open reading frame 126	MMS19	MMS19 nucleotide excision repair homolog (S. cerevisiae)				GOLGA8F	golgin A8 family, member F	SLC2A5	solute carrier family 2 (facilitated glucose/fructose transporter), member 5
C10orf25	chromosome 10 open reading frame 25	MOB3B	MOB kinase activator 3B				GOLGA8G	golgin A8 family, member G	SLC30A10	solute carrier family 30, member 10
C10orf32	chromosome 10 open reading frame 32	MOB4	MOB family member 4, phocein				GOLGA8H	golgin A8 family, member H	SLC30A5	solute carrier family 30 (zinc transporter), member 5
C10orf55	chromosome 10 open reading frame 55	MOBP	myelin-associated oligodendrocyte basic protein				GOLGA8I	golgin A8 family, member I	SLC30A9	solute carrier family 30 (zinc transporter), member 9
C10orf71	chromosome 10 open reading frame 71	MOCOS	molybdenum cofactor sulfurase				GOLGA8J	golgin A8 family, member J	SLC33A1	solute carrier family 33 (acetyl-CoA transporter), member 1
C10orf76	chromosome 10 open reading frame 76	MOCS2	molybdenum cofactor synthesis 2				GOLGA8K	golgin A8 family, member K	SLC35A1	solute carrier family 35 (CMP-sialic acid transporter), member A1
C11orf16	chromosome 11 open reading frame 16	MOG	myelin oligodendrocyte glycoprotein				GOLGA8M	golgin A8 family, member M	SLC35A3	solute carrier family 35 (UDP-N-acetylglucosamine (UDP-GlcNAc) transporter), member A3
C11orf21	chromosome 11 open reading frame 21	MON1B	MON1 secretory trafficking family member B				GOLGA8N	golgin A8 family, member N	SLC35B2	solute carrier family 35 (adenosine 3'-phospho 5'-phosphosulfate transporter), member B2
C11orf44	chromosome 11 open reading frame 44	MON2	MON2 homolog (S. cerevisiae)				GOLGA8O	golgin A8 family, member O	SLC35B4	solute carrier family 35 (UDP-xylose/UDP-N-acetylglucosamine transporter), member B4
C11orf57	chromosome 11 open reading frame 57	MORC4	MORC family CW-type zinc finger 4				GOLGA8R	golgin A8 family, member R	SLC35C2	solute carrier family 35 (GDP-fucose transporter), member C2
C11orf72	chromosome 11 open reading frame 72	MPEG1	macrophage expressed 1				GOLGB1	golgin B1	SLC35F1	solute carrier family 35, member F1
C11orf74	chromosome 11 open reading frame 74	MPL	myeloproliferative leukemia virus oncogene				GOLM1	golgi membrane protein 1	SLC35F2	solute carrier family 35, member F2
C11orf82	chromosome 11 open reading frame 82	MPLKIP	M-phase specific PLK1 interacting protein				GOSR2	golgi SNAP receptor complex member 2	SLC35F6	solute carrier family 35, member F6
C12orf4	chromosome 12 open reading frame 4	MPP2	membrane protein, palmitoylated 2 (MAGUK p55 subfamily member 2)				GOT2	glutamic-oxaloacetic transaminase 2, mitochondrial	SLC36A1	solute carrier family 36 (proton/amino acid symporter), member 1
C12orf43	chromosome 12 open reading frame 43	MPP6	membrane protein, palmitoylated 6 (MAGUK p55 subfamily member 6)				GPALPP1	GPALPP motifs containing 1	SLC37A2	solute carrier family 37 (glucose-6-phosphate transporter), member 2
C12orf49	chromosome 12 open reading frame 49	MPP7	membrane protein, palmitoylated 7 (MAGUK p55 subfamily member 7)				GPAM	glycerol-3-phosphate acyltransferase, mitochondrial	SLC38A1	solute carrier family 38, member 1
C12orf5	chromosome 12 open reading frame 5	MPPE1	metallophosphoesterase 1				GPATCH2L	G patch domain containing 2-like	SLC38A7	solute carrier family 38, member 7
C14orf166	chromosome 14 open reading frame 166	MPV17L	MPV17 mitochondrial membrane protein-like				GPATCH8	G patch domain containing 8	SLC38A9	solute carrier family 38, member 9
C14orf23	chromosome 14 open reading frame 23	MPZL1	myelin protein zero-like 1				GPC4	glypican 4	SLC39A11	solute carrier family 39, member 11
C14orf37	chromosome 14 open reading frame 37	MPZL3	myelin protein zero-like 3				GPC5	glypican 5	SLC39A7	solute carrier family 39 (zinc transporter), member 7
C14orf79	chromosome 14 open reading frame 79	MR1	major histocompatibility complex, class I-related				GPC6	glypican 6	SLC39A8	solute carrier family 39 (zinc transporter), member 8
C15orf38	chromosome 15 open reading frame 38	MRC2	mannose receptor, C type 2				GPD1	glycerol-3-phosphate dehydrogenase 1 (soluble)	SLC43A2	solute carrier family 43 (amino acid system L transporter), member 2
C15orf40	chromosome 15 open reading frame 40	MRE11A	MRE11 meiotic recombination 11 homolog A (S. cerevisiae)				GPKOW	G patch domain and KOW motifs	SLC44A4	solute carrier family 44, member 4
C15orf52	chromosome 15 open reading frame 52	MRI1	methylthioribose-1-phosphate isomerase 1				GPR12	G protein-coupled receptor 12	SLC4A1	solute carrier family 4 (anion exchanger), member 1
C16orf45	chromosome 16 open reading frame 45	MRPL12	mitochondrial ribosomal protein L12				GPR124	G protein-coupled receptor 124	SLC4A10	solute carrier family 4, sodium bicarbonate transporter, member 10
C16orf52	chromosome 16 open reading frame 52	MRPL17	mitochondrial ribosomal protein L17				GPR137B	G protein-coupled receptor 137B	SLC4A5	solute carrier family 4 (sodium bicarbonate cotransporter), member 5
C16orf58	chromosome 16 open reading frame 58	MRPL3	mitochondrial ribosomal protein L3				GPR15	G protein-coupled receptor 15	SLC4A8	solute carrier family 4, sodium bicarbonate cotransporter, member 8
C16orf70	chromosome 16 open reading frame 70	MRPL34	mitochondrial ribosomal protein L34				GPR155	G protein-coupled receptor 155	SLC5A3	sodium/myo-inositol cotransporter
C17orf102	chromosome 17 open reading frame 102	MRPL35	mitochondrial ribosomal protein L35				GPR156	G protein-coupled receptor 156	SLC6A11	solute carrier family 6 (neurotransmitter transporter), member 11
C17orf103	chromosome 17 open reading frame 103	MRPL42	mitochondrial ribosomal protein L42				GPR161	G protein-coupled receptor 161	SLC6A12	solute carrier family 6 (neurotransmitter transporter), member 12
C17orf72	chromosome 17 open reading frame 72	MRPL46	mitochondrial ribosomal protein L46				GPR180	G protein-coupled receptor 180	SLC6A15	solute carrier family 6 (neutral amino acid transporter), member 15
C17orf80	chromosome 17 open reading frame 80	MRPL48	mitochondrial ribosomal protein L48				GPR183	G protein-coupled receptor 183	SLC6A5	solute carrier family 6 (neurotransmitter transporter), member 5
C17orf82	chromosome 17 open reading frame 82	MRPL49	mitochondrial ribosomal protein L49				GPR25	G protein-coupled receptor 25	SLC6A6	solute carrier family 6 (neurotransmitter transporter), member 6
C17orf85	chromosome 17 open reading frame 85	MRPS16	mitochondrial ribosomal protein S16				GPR26	G protein-coupled receptor 26	SLC7A1	solute carrier family 7 (cationic amino acid transporter, y+ system), member 1
C18orf21	chromosome 18 open reading frame 21	MRPS18B	mitochondrial ribosomal protein S18B				GPR3	G protein-coupled receptor 3	SLC7A11	solute carrier family 7 (anionic amino acid transporter light chain, xc- system), member 11
C18orf25	chromosome 18 open reading frame 25	MRPS23	mitochondrial ribosomal protein S23				GPR31	G protein-coupled receptor 31	SLC7A6OS	solute carrier family 7, member 6 opposite strand
C18orf32	chromosome 18 open reading frame 32	MRPS30	mitochondrial ribosomal protein S30				GPR35	G protein-coupled receptor 35	SLC8A1	solute carrier family 8 (sodium/calcium exchanger), member 1
C18orf42	chromosome 18 open reading frame 42	MRPS5	mitochondrial ribosomal protein S5				GPR4	G protein-coupled receptor 4	SLC9A3R2	solute carrier family 9, subfamily A (NHE3, cation proton antiporter 3), member 3 regulator 2
C18orf54	chromosome 18 open reading frame 54	MRRF	mitochondrial ribosome recycling factor				GPR56	G protein-coupled receptor 56	SLC9A6	solute carrier family 9, subfamily A (NHE6, cation proton antiporter 6), member 6
C19orf12	chromosome 19 open reading frame 12	MRS2	MRS2 magnesium transporter				GPR65	G protein-coupled receptor 65	SLC9A7	solute carrier family 9, subfamily A (NHE7, cation proton antiporter 7), member 7
C19orf24	chromosome 19 open reading frame 24	MRTO4	mRNA turnover 4 homolog (S. cerevisiae)				GPR75	G protein-coupled receptor 75	SLC9A8	solute carrier family 9, subfamily A (NHE8, cation proton antiporter 8), member 8
C19orf68	chromosome 19 open reading frame 68	MRVI1	murine retrovirus integration site 1 homolog				GPR78	G protein-coupled receptor 78	SLC9B2	solute carrier family 9, subfamily B (NHA2, cation proton antiporter 2), member 2
C1D	C1D nuclear receptor corepressor	MS4A1	membrane-spanning 4-domains, subfamily A, member 1				GPRC5A	G protein-coupled receptor, family C, group 5, member A	SLCO1A2	solute carrier organic anion transporter family, member 1A2
C1GALT1	core 1 synthase, glycoprotein-N-acetylgalactosamine 3-beta-galactosyltransferase, 1	MS4A2	membrane-spanning 4-domains, subfamily A, member 2				GPRC5B	G protein-coupled receptor, family C, group 5, member B	SLCO3A1	solute carrier organic anion transporter family, member 3A1
C1orf101	chromosome 1 open reading frame 101	MS4A3	membrane-spanning 4-domains, subfamily A, member 3 (hematopoietic cell-specific)				GPRIN3	GPRIN family member 3	SLCO4C1	solute carrier organic anion transporter family, member 4C1
C1orf106	chromosome 1 open reading frame 106	MSANTD3	Myb/SANT-like DNA-binding domain containing 3				GPX3	glutathione peroxidase 3 (plasma)	SLCO5A1	solute carrier organic anion transporter family, member 5A1
C1orf116	chromosome 1 open reading frame 116	MSANTD4	Myb/SANT-like DNA-binding domain containing 4 with coiled-coils				GPX5	glutathione peroxidase 5 (epididymal androgen-related protein)	SLCO6A1	solute carrier organic anion transporter family, member 6A1
C1orf122	chromosome 1 open reading frame 122	MSC	musculin				GPX6	glutathione peroxidase 6 (olfactory)	SLFN12	schlafen family member 12
C1orf131	chromosome 1 open reading frame 131	MSI1	musashi RNA-binding protein 1				GPX8	glutathione peroxidase 8 (putative)	SLFN12L	schlafen family member 12-like
C1orf173	chromosome 1 open reading frame 173	MSL2	male-specific lethal 2 homolog (Drosophila)				GRAMD2	GRAM domain containing 2	SLFN13	schlafen family member 13
C1orf174	chromosome 1 open reading frame 174	MSR1	macrophage scavenger receptor 1				GRAP2	GRB2-related adaptor protein 2	SLFN5	schlafen family member 5
C1orf180	chromosome 1 open reading frame 180	MTAP	methylthioadenosine phosphorylase				GRB10	growth factor receptor-bound protein 10	SLIT1	slit homolog 1 (Drosophila)
C1orf198	chromosome 1 open reading frame 198	MTDH	metadherin				GREB1L	growth regulation by estrogen in breast cancer-like	SLIT3	slit homolog 3 (Drosophila)
C1orf21	chromosome 1 open reading frame 21	MTF1	metal-regulatory transcription factor 1				GREM1	gremlin 1, DAN family BMP antagonist	SLITRK1	SLIT and NTRK-like family, member 1
C1orf213	chromosome 1 open reading frame 213	MTG1	mitochondrial ribosome-associated GTPase 1				GREM2	gremlin 2, DAN family BMP antagonist	SLITRK2	SLIT and NTRK-like family, member 2
C1orf226	chromosome 1 open reading frame 226	MTHFD1L	methylenetetrahydrofolate dehydrogenase (NADP+ dependent) 1-like				GRHL2	grainyhead-like 2 (Drosophila)	SLMO2	slowmo homolog 2 (Drosophila)
C1orf233	chromosome 1 open reading frame 233	MTHFR	methylenetetrahydrofolate reductase (NAD(P)H)				GRHPR	glyoxylate reductase/hydroxypyruvate reductase	SLN	sarcolipin
C1orf43	chromosome 1 open reading frame 43	MTHFS	5,10-methenyltetrahydrofolate synthetase (5-formyltetrahydrofolate cyclo-ligase)				GRID1	glutamate receptor, ionotropic, delta 1	SLX4	SLX4 structure-specific endonuclease subunit
C1orf50	chromosome 1 open reading frame 50	MTMR14	myotubularin related protein 14				GRIK3	glutamate receptor, ionotropic, kainate 3	SMAD2	SMAD family member 2
C1orf52	chromosome 1 open reading frame 52	MTMR2	myotubularin related protein 2				GRIN2A	glutamate receptor, ionotropic, N-methyl D-aspartate 2A	SMARCA5	SWI/SNF related, matrix associated, actin dependent regulator of chromatin, subfamily a, member 5
C1orf85	chromosome 1 open reading frame 85	MTMR6	myotubularin related protein 6				GRIN2B	glutamate receptor, ionotropic, N-methyl D-aspartate 2B	SMARCAD1	SWI/SNF-related, matrix-associated actin-dependent regulator of chromatin, subfamily a, containing DEAD/H box 1
C1orf95	chromosome 1 open reading frame 95	MTMR9	myotubularin related protein 9				GRIN2D	glutamate receptor, ionotropic, N-methyl D-aspartate 2D	SMARCC1	SWI/SNF related, matrix associated, actin dependent regulator of chromatin, subfamily c, member 1
C1QTNF1	C1q and tumor necrosis factor related protein 1	MTO1	mitochondrial tRNA translation optimization 1				GRIN3A	glutamate receptor, ionotropic, N-methyl-D-aspartate 3A	SMARCD1	SWI/SNF related, matrix associated, actin dependent regulator of chromatin, subfamily d, member 1
C1S	complement component 1, s subcomponent	MTR	5-methyltetrahydrofolate-homocysteine methyltransferase				GRINA	glutamate receptor, ionotropic, N-methyl D-aspartate-associated protein 1 (glutamate binding)	SMC2	structural maintenance of chromosomes 2
C20orf112	chromosome 20 open reading frame 112	MTRNR2L7	MT-RNR2-like 7				GRM4	glutamate receptor, metabotropic 4	SMC3	structural maintenance of chromosomes 3
C20orf196	chromosome 20 open reading frame 196	MTUS2	microtubule associated tumor suppressor candidate 2				GRM5	glutamate receptor, metabotropic 5	SMC5	structural maintenance of chromosomes 5
C20orf202	chromosome 20 open reading frame 202	MTX3	metaxin 3				GRM6	glutamate receptor, metabotropic 6	SMCHD1	structural maintenance of chromosomes flexible hinge domain containing 1
C20orf96	chromosome 20 open reading frame 96	MUC20	mucin 20, cell surface associated				GRPR	gastrin-releasing peptide receptor	SMCO4	single-pass membrane protein with coiled-coil domains 4
C21orf2	chromosome 21 open reading frame 2	MUC21	mucin 21, cell surface associated				GSC2	goosecoid homeobox 2	SMG7	SMG7 nonsense mediated mRNA decay factor
C21orf62	chromosome 21 open reading frame 62	MUC3A	mucin 3A, cell surface associated				GSK3B	glycogen synthase kinase 3 beta	SMIM11	small integral membrane protein 11
C21orf67	chromosome 21 open reading frame 67	MUC4	mucin 4, cell surface associated				GSPT1	G1 to S phase transition 1	SMIM14	small integral membrane protein 14
C21orf91	chromosome 21 open reading frame 91	MUM1L1	melanoma associated antigen (mutated) 1-like 1				GSTK1	glutathione S-transferase kappa 1	SMIM19	small integral membrane protein 19
C22orf29	chromosome 22 open reading frame 29	MVB12B	multivesicular body subunit 12B				GSTM3	glutathione S-transferase mu 3 (brain)	SMIM22	small integral membrane protein 22
C22orf42	chromosome 22 open reading frame 42	MXD1	MAX dimerization protein 1				GSTO1	glutathione S-transferase omega 1	SMIM7	small integral membrane protein 7
C22orf46	chromosome 22 open reading frame 46	MXRA5	matrix-remodelling associated 5				GSTO2	glutathione S-transferase omega 2	SMIM8	small integral membrane protein 8
C2CD2	C2 calcium-dependent domain containing 2	MYADM	myeloid-associated differentiation marker				GTDC1	glycosyltransferase-like domain containing 1	SMLR1	small leucine-rich protein 1
C2CD2L	C2CD2-like	MYL9	myosin, light chain 9, regulatory				GTF2B	general transcription factor IIB	SMNDC1	survival motor neuron domain containing 1
C2ORF15	Uncharacterized protein C2orf15	MYLK	myosin light chain kinase				GTF2H5	general transcription factor IIH, polypeptide 5	SMO	smoothened, frizzled family receptor
C2orf27A	chromosome 2 open reading frame 27A	MYLK3	myosin light chain kinase 3				GTF2IRD2	GTF2I repeat domain containing 2	SMPDL3B	sphingomyelin phosphodiesterase, acid-like 3B
C2orf27B	chromosome 2 open reading frame 27B	MYLK4	myosin light chain kinase family, member 4				GTF2IRD2B	GTF2I repeat domain containing 2B	SMR3B	submaxillary gland androgen regulated protein 3B
C2orf43	chromosome 2 open reading frame 43	MYO10	myosin X				GTF3C3	general transcription factor IIIC, polypeptide 3, 102kDa	SMTNL2	smoothelin-like 2
C2orf68	chromosome 2 open reading frame 68	MYO18A	myosin XVIIIA				GTF3C4	general transcription factor IIIC, polypeptide 4, 90kDa	SMUG1	single-strand-selective monofunctional uracil-DNA glycosylase 1
C2orf72	chromosome 2 open reading frame 72	MYO1A	myosin IA				GUCD1	guanylyl cyclase domain containing 1	SMYD2	SET and MYND domain containing 2
C2orf73	chromosome 2 open reading frame 73	MYO1B	myosin IB				GUCY1A2	guanylate cyclase 1, soluble, alpha 2	SMYD5	SMYD family member 5
C2orf88	chromosome 2 open reading frame 88	MYO1D	myosin ID				GUCY1A3	guanylate cyclase 1, soluble, alpha 3	SNAP25	synaptosomal-associated protein, 25kDa
C3orf14	chromosome 3 open reading frame 14	MYO1E	myosin IE				GUF1	GUF1 GTPase homolog (S. cerevisiae)	SNAP29	synaptosomal-associated protein, 29kDa
C3orf17	chromosome 3 open reading frame 17	MYO1G	myosin IG				GXYLT1	glucoside xylosyltransferase 1	SNAP47	synaptosomal-associated protein, 47kDa
C3orf33	chromosome 3 open reading frame 33	MYO5B	myosin VB				GXYLT2	glucoside xylosyltransferase 2	SNAPC3	small nuclear RNA activating complex, polypeptide 3, 50kDa
C3orf62	chromosome 3 open reading frame 62	MYO6	myosin VI				GYPC	glycophorin C (Gerbich blood group)	SNCB	synuclein, beta
C3orf67	chromosome 3 open reading frame 67	MYO9A	myosin IXA				HABP2	hyaluronan binding protein 2	SND1	staphylococcal nuclease and tudor domain containing 1
C3orf70	chromosome 3 open reading frame 70	MYO9B	myosin IXB				HACE1	HECT domain and ankyrin repeat containing E3 ubiquitin protein ligase 1	SNN	stannin
C4orf3	chromosome 4 open reading frame 3	MYOCD	myocardin				HADHA	hydroxyacyl-CoA dehydrogenase/3-ketoacyl-CoA thiolase/enoyl-CoA hydratase (trifunctional protein), alpha subunit	SNRNP200	small nuclear ribonucleoprotein 200kDa (U5)
C4orf40	chromosome 4 open reading frame 40	MYOM2	myomesin 2				HAL	histidine ammonia-lyase	SNRNP25	small nuclear ribonucleoprotein 25kDa (U11/U12)
C5orf27	chromosome 5 open reading frame 27	MYOZ2	myozenin 2				HAND1	heart and neural crest derivatives expressed 1	SNRNP35	small nuclear ribonucleoprotein 35kDa (U11/U12)
C5orf45	chromosome 5 open reading frame 45	MYOZ3	myozenin 3				HAP1	huntingtin-associated protein 1	SNRPB2	small nuclear ribonucleoprotein polypeptide B
C5orf49	chromosome 5 open reading frame 49	MYPN	myopalladin				HAPLN4	hyaluronan and proteoglycan link protein 4	SNRPD2	small nuclear ribonucleoprotein D2 polypeptide 16.5kDa
C6	complement component 6	MYSM1	Myb-like, SWIRM and MPN domains 1				HARBI1	harbinger transposase derived 1	SNTB2	syntrophin, beta 2 (dystrophin-associated protein A1, 59kDa, basic component 2)
C6orf106	chromosome 6 open reading frame 106	N4BP2	NEDD4 binding protein 2				HAS1	hyaluronan synthase 1	SNX11	sorting nexin 11
C6orf141	chromosome 6 open reading frame 141	N4BP2L1	NEDD4 binding protein 2-like 1				HAS3	hyaluronan synthase 3	SNX16	sorting nexin 16
C6orf15	chromosome 6 open reading frame 15	N4BP2L2	NEDD4 binding protein 2-like 2				HAT1	histone acetyltransferase 1	SNX19	sorting nexin 19
C6orf211	chromosome 6 open reading frame 211	N6AMT1	N-6 adenine-specific DNA methyltransferase 1 (putative)				HAUS2	HAUS augmin-like complex, subunit 2	SNX2	sorting nexin 2
C6orf89	chromosome 6 open reading frame 89	NAA25	N(alpha)-acetyltransferase 25, NatB auxiliary subunit				HAUS3	HAUS augmin-like complex, subunit 3	SNX20	sorting nexin 20
C7	complement component 7	NAA38	N(alpha)-acetyltransferase 38, NatC auxiliary subunit				HAUS5	HAUS augmin-like complex, subunit 5	SNX24	sorting nexin 24
C7orf10	chromosome 7 open reading frame 10	NAA50	N(alpha)-acetyltransferase 50, NatE catalytic subunit				HBS1L	HBS1-like (S. cerevisiae)	SNX27	sorting nexin family member 27
C7orf41	chromosome 7 open reading frame 41	NAALAD2	N-acetylated alpha-linked acidic dipeptidase 2				HCCS	holocytochrome c synthase	SNX29	sorting nexin 29
C7orf55-LUC7L2	C7orf55-LUC7L2 readthrough	NABP1	nucleic acid binding protein 1				HCG27	HLA complex group 27 (non-protein coding)	SNX32	sorting nexin 32
C7orf60	chromosome 7 open reading frame 60	NACC1	nucleus accumbens associated 1, BEN and BTB (POZ) domain containing				HCN1	hyperpolarization activated cyclic nucleotide-gated potassium channel 1	SNX33	sorting nexin 33
C7orf76	chromosome 7 open reading frame 76	NACC2	NACC family member 2, BEN and BTB (POZ) domain containing				HDAC2	histone deacetylase 2	SOCS5	suppressor of cytokine signaling 5
C8orf22	chromosome 8 open reading frame 22	NAGK	N-acetylglucosamine kinase				HDAC4	histone deacetylase 4	SOCS7	suppressor of cytokine signaling 7
C8orf33	chromosome 8 open reading frame 33	NAMPT	nicotinamide phosphoribosyltransferase				HDAC5	histone deacetylase 5	SOD2	superoxide dismutase 2, mitochondrial
C8orf44-SGK3	C8orf44-SGK3 readthrough	NANOS1	nanos homolog 1 (Drosophila)				HDLBP	high density lipoprotein binding protein	SOGA3	SOGA family member 3
C8orf46	chromosome 8 open reading frame 46	NAT14	N-acetyltransferase 14 (GCN5-related, putative)				HDX	highly divergent homeobox	SON	SON DNA binding protein
C9orf114	chromosome 9 open reading frame 114	NAT16	N-acetyltransferase 16 (GCN5-related, putative)				HEATR1	HEAT repeat containing 1	SORBS1	sorbin and SH3 domain containing 1
C9orf139	chromosome 9 open reading frame 139	NAV1	neuron navigator 1				HEATR3	HEAT repeat containing 3	SORBS2	sorbin and SH3 domain containing 2
C9orf163	chromosome 9 open reading frame 163	NAV3	neuron navigator 3				HEATR5A	HEAT repeat containing 5A	SORCS1	sortilin-related VPS10 domain containing receptor 1
C9orf170	chromosome 9 open reading frame 170	NBEAL1	neurobeachin-like 1				HECTD2	HECT domain containing E3 ubiquitin protein ligase 2	SORL1	sortilin-related receptor, L(DLR class) A repeats containing
C9orf40	chromosome 9 open reading frame 40	NBL1	neuroblastoma 1, DAN family BMP antagonist				HECW1	HECT, C2 and WW domain containing E3 ubiquitin protein ligase 1	SOS1	son of sevenless homolog 1 (Drosophila)
C9orf41	chromosome 9 open reading frame 41	NBN	nibrin				HECW2	HECT, C2 and WW domain containing E3 ubiquitin protein ligase 2	SOWAHA	sosondowah ankyrin repeat domain family member A
C9orf47	chromosome 9 open reading frame 47	NCAPG	non-SMC condensin I complex, subunit G				HEG1	heart development protein with EGF-like domains 1	SOX11	SRY (sex determining region Y)-box 11
C9orf53	chromosome 9 open reading frame 53	NCAPH	non-SMC condensin I complex, subunit H				HELB	helicase (DNA) B	SOX2	SRY (sex determining region Y)-box 2
C9orf57	chromosome 9 open reading frame 57	NCBP2	nuclear cap binding protein subunit 2, 20kDa				HELLS	helicase, lymphoid-specific	SOX4	SRY (sex determining region Y)-box 4
C9orf62	chromosome 9 open reading frame 62	NCCRP1	non-specific cytotoxic cell receptor protein 1 homolog (zebrafish)				HELZ	helicase with zinc finger	SOX5	SRY (sex determining region Y)-box 5
C9orf85	chromosome 9 open reading frame 85	NCK1	NCK adaptor protein 1				HEMK1	HemK methyltransferase family member 1	SOX6	SRY (sex determining region Y)-box 6
C9orf91	chromosome 9 open reading frame 91	NCKAP1	NCK-associated protein 1				HEPACAM	hepatic and glial cell adhesion molecule	SP1	Sp1 transcription factor
C9orf96	chromosome 9 open reading frame 96	NCKAP1L	NCK-associated protein 1-like				HEPH	hephaestin	SP110	SP110 nuclear body protein
CA12	carbonic anhydrase XII	NCKAP5	NCK-associated protein 5				HEPHL1	hephaestin-like 1	SP140L	SP140 nuclear body protein-like
CA14	carbonic anhydrase XIV	NCKIPSD	NCK interacting protein with SH3 domain				HES2	hairy and enhancer of split 2 (Drosophila)	SP3	Sp3 transcription factor
CA4	carbonic anhydrase IV	NCMAP	noncompact myelin associated protein				HEXA	hexosaminidase A (alpha polypeptide)	SP7	Sp7 transcription factor
CA5B	carbonic anhydrase VB, mitochondrial	NCOA5	nuclear receptor coactivator 5				HEYL	hairy/enhancer-of-split related with YRPW motif-like	SP8	Sp8 transcription factor
CA7	carbonic anhydrase VII	NCR1	natural cytotoxicity triggering receptor 1				HGF	hepatocyte growth factor (hepapoietin A; scatter factor)	SPAG1	sperm associated antigen 1
CA8	carbonic anhydrase VIII	NCR3LG1	natural killer cell cytotoxicity receptor 3 ligand 1				HGS	hepatocyte growth factor-regulated tyrosine kinase substrate	SPAG5	sperm associated antigen 5
CABP2	calcium binding protein 2	NDE1	nudE neurodevelopment protein 1				HHAT	hedgehog acyltransferase	SPANXN1	SPANX family, member N1
CABP4	calcium binding protein 4	NDEL1	nudE neurodevelopment protein 1-like 1				HHIP	hedgehog interacting protein	SPARC	secreted protein, acidic, cysteine-rich (osteonectin)
CACNA1C	calcium channel, voltage-dependent, L type, alpha 1C subunit	NDNF	neuron-derived neurotrophic factor				HIF3A	hypoxia inducible factor 3, alpha subunit	SPATA12	spermatogenesis associated 12
CACNA1E	calcium channel, voltage-dependent, R type, alpha 1E subunit	NDRG1	N-myc downstream regulated 1				HINT1	histidine triad nucleotide binding protein 1	SPATA13	spermatogenesis associated 13
CACNA1S	calcium channel, voltage-dependent, L type, alpha 1S subunit	NDST3	N-deacetylase/N-sulfotransferase (heparan glucosaminyl) 3				HIPK2	homeodomain interacting protein kinase 2	SPATA17	spermatogenesis associated 17
CACNB2	calcium channel, voltage-dependent, beta 2 subunit	NDUFA10	NADH dehydrogenase (ubiquinone) 1 alpha subcomplex, 10, 42kDa				HIST1H2AH	histone cluster 1, H2ah	SPATA22	spermatogenesis associated 22
CACNB4	calcium channel, voltage-dependent, beta 4 subunit	NDUFA11	NADH dehydrogenase (ubiquinone) 1 alpha subcomplex, 11, 14.7kDa				HIST1H2AK	histone cluster 1, H2ak	SPATA33	spermatogenesis associated 33
CACNG3	calcium channel, voltage-dependent, gamma subunit 3	NDUFAF5	NADH dehydrogenase (ubiquinone) complex I, assembly factor 5				HIST1H2AM	histone cluster 1, H2am	SPATA5	spermatogenesis associated 5
CACNG4	calcium channel, voltage-dependent, gamma subunit 4	NDUFB3	NADH dehydrogenase (ubiquinone) 1 beta subcomplex, 3, 12kDa				HIST1H2BG	histone cluster 1, H2bg	SPATA6L	spermatogenesis associated 6-like
CACNG7	calcium channel, voltage-dependent, gamma subunit 7	NDUFC2-KCTD14	NDUFC2-KCTD14 readthrough				HIST1H2BJ	histone cluster 1, H2bj	SPECC1	sperm antigen with calponin homology and coiled-coil domains 1
CACTIN	cactin, spliceosome C complex subunit	NDUFS1	NADH dehydrogenase (ubiquinone) Fe-S protein 1, 75kDa (NADH-coenzyme Q reductase)				HIST1H3H	histone cluster 1, H3h	SPECC1L	sperm antigen with calponin homology and coiled-coil domains 1-like
CACUL1	CDK2-associated, cullin domain 1	NEBL	nebulette				HIST3H2BB	histone cluster 3, H2bb	SPEM1	spermatid maturation 1
CACYBP	calcyclin binding protein	NEDD4L	neural precursor cell expressed, developmentally down-regulated 4-like, E3 ubiquitin protein ligase				HIVEP3	human immunodeficiency virus type I enhancer binding protein 3	SPG20	spastic paraplegia 20 (Troyer syndrome)
CAD	carbamoyl-phosphate synthetase 2, aspartate transcarbamylase, and dihydroorotase	NEGR1	neuronal growth regulator 1				HJURP	Holliday junction recognition protein	SPG21	spastic paraplegia 21 (autosomal recessive, Mast syndrome)
CADM1	cell adhesion molecule 1	NEK10	NIMA-related kinase 10				HKR1	HKR1, GLI-Kruppel zinc finger family member	SPG7	spastic paraplegia 7 (pure and complicated autosomal recessive)
CADM4	cell adhesion molecule 4	NEK3	NIMA-related kinase 3				HLA-A	major histocompatibility complex, class I, A	SPHKAP	SPHK1 interactor, AKAP domain containing
CADPS	Ca++-dependent secretion activator	NEK8	NIMA-related kinase 8				HLA-DMB	major histocompatibility complex, class II, DM beta	SPIB	Spi-B transcription factor (Spi-1/PU.1 related)
CADPS2	Ca++-dependent secretion activator 2	NEK9	NIMA-related kinase 9				HLA-DOB	major histocompatibility complex, class II, DO beta	SPICE1	spindle and centriole associated protein 1
CALCOCO2	calcium binding and coiled-coil domain 2	NES	nestin				HLA-DQA1	major histocompatibility complex, class II, DQ alpha 1	SPIN1	spindlin 1
CALCR	calcitonin receptor	NEURL1B	neuralized homolog 1B (Drosophila)				HLA-DQA2	major histocompatibility complex, class II, DQ alpha 2	SPIN3	spindlin family, member 3
CALM1	calmodulin 1 (phosphorylase kinase, delta)	NEUROD1	neuronal differentiation 1				HLA-DQB2	major histocompatibility complex, class II, DQ beta 2	SPINK5	serine peptidase inhibitor, Kazal type 5
CALN1	calneuron 1	NEUROD4	neuronal differentiation 4				HLCS	holocarboxylase synthetase (biotin-(proprionyl-CoA-carboxylase (ATP-hydrolysing)) ligase)	SPINK8	serine peptidase inhibitor, Kazal type 8 (putative)
CALR	calreticulin	NF1	neurofibromin 1				HLTF	helicase-like transcription factor	SPINT1	serine peptidase inhibitor, Kunitz type 1
CALU	calumenin	NFASC	neurofascin				HMG20A	high mobility group 20A	SPN	sialophorin
CAMK1D	calcium/calmodulin-dependent protein kinase ID	NFATC1	nuclear factor of activated T-cells, cytoplasmic, calcineurin-dependent 1				HMGB1	high mobility group box 1	SPOPL	speckle-type POZ protein-like
CAMK1G	calcium/calmodulin-dependent protein kinase IG	NFATC2	nuclear factor of activated T-cells, cytoplasmic, calcineurin-dependent 2				HMGCL	3-hydroxymethyl-3-methylglutaryl-CoA lyase	SPRED3	sprouty-related, EVH1 domain containing 3
CAMK2A	calcium/calmodulin-dependent protein kinase II alpha	NFE2L3	nuclear factor, erythroid 2-like 3				HMGCLL1	3-hydroxymethyl-3-methylglutaryl-CoA lyase-like 1	SPRTN	SprT-like N-terminal domain
CAMK2D	calcium/calmodulin-dependent protein kinase II delta	NFIA	nuclear factor I/A				HMGCS1	3-hydroxy-3-methylglutaryl-CoA synthase 1 (soluble)	SPRY3	sprouty homolog 3 (Drosophila)
CAMK2G	calcium/calmodulin-dependent protein kinase II gamma	NFIB	nuclear factor I/B				HMGCS2	3-hydroxy-3-methylglutaryl-CoA synthase 2 (mitochondrial)	SPRYD7	SPRY domain containing 7
CAMK2N1	calcium/calmodulin-dependent protein kinase II inhibitor 1	NFIC	nuclear factor I/C (CCAAT-binding transcription factor)				HMGN2	high mobility group nucleosomal binding domain 2	SPTBN1	spectrin, beta, non-erythrocytic 1
CAMK4	calcium/calmodulin-dependent protein kinase IV	NFYA	nuclear transcription factor Y, alpha				HMGN3	high mobility group nucleosomal binding domain 3	SPTBN2	spectrin, beta, non-erythrocytic 2
CAPN7	calpain 7	NGDN	neuroguidin, EIF4E binding protein				HMGN5	high mobility group nucleosome binding domain 5	SPTY2D1	SPT2, Suppressor of Ty, domain containing 1 (S. cerevisiae)
CAPRIN1	cell cycle associated protein 1	NGRN	neugrin, neurite outgrowth associated				HMOX2	heme oxygenase (decycling) 2	SRC	v-src avian sarcoma (Schmidt-Ruppin A-2) viral oncogene homolog
CAPZA1	capping protein (actin filament) muscle Z-line, alpha 1	NHEJ1	nonhomologous end-joining factor 1				HNF4A	hepatocyte nuclear factor 4, alpha	SRCIN1	SRC kinase signaling inhibitor 1
CARD8	caspase recruitment domain family, member 8	NHSL1	NHS-like 1				HNRNPC	heterogeneous nuclear ribonucleoprotein C (C1/C2)	SRD5A1	steroid-5-alpha-reductase, alpha polypeptide 1 (3-oxo-5 alpha-steroid delta 4-dehydrogenase alpha 1)
CARHSP1	calcium regulated heat stable protein 1, 24kDa	NIF3L1	NIF3 NGG1 interacting factor 3-like 1 (S. cerevisiae)				HNRNPDL	heterogeneous nuclear ribonucleoprotein D-like	SRD5A3	steroid 5 alpha-reductase 3
CASD1	CAS1 domain containing 1	NIPA2	non imprinted in Prader-Willi/Angelman syndrome 2				HNRNPH3	heterogeneous nuclear ribonucleoprotein H3 (2H9)	SREK1IP1	SREK1-interacting protein 1
CASK	calcium/calmodulin-dependent serine protein kinase (MAGUK family)	NIPAL2	NIPA-like domain containing 2				HNRNPU	heterogeneous nuclear ribonucleoprotein U (scaffold attachment factor A)	SRGAP1	SLIT-ROBO Rho GTPase activating protein 1
CASP14	caspase 14, apoptosis-related cysteine peptidase	NIPAL3	NIPA-like domain containing 3				HOMER1	homer homolog 1 (Drosophila)	SRGAP2	SLIT-ROBO Rho GTPase activating protein 2
CASP16	caspase 16, apoptosis-related cysteine peptidase (putative)	NIT2	nitrilase family, member 2				HOMEZ	homeobox and leucine zipper encoding	SRM	spermidine synthase
CASR	calcium-sensing receptor	NKAP	NFKB activating protein				HOXA11	homeobox A11	SRP72	signal recognition particle 72kDa
CBFA2T2	core-binding factor, runt domain, alpha subunit 2; translocated to, 2	NKX3-1	NK3 homeobox 1				HOXA13	homeobox A13	SRPX2	sushi-repeat containing protein, X-linked 2
CBFB	core-binding factor, beta subunit	NLGN2	neuroligin 2				HOXB1	homeobox B1	SRRM4	serine/arginine repetitive matrix 4
CBLB	Cbl proto-oncogene B, E3 ubiquitin protein ligase	NLGN3	neuroligin 3				HOXB2	homeobox B2	SRSF1	serine/arginine-rich splicing factor 1
CBLN3	cerebellin 3 precursor	NLRC3	NLR family, CARD domain containing 3				HOXC12	homeobox C12	SRSF3	serine/arginine-rich splicing factor 3
CBX1	chromobox homolog 1	NLRP9	NLR family, pyrin domain containing 9				HOXC5	homeobox C5	SRSF4	serine/arginine-rich splicing factor 4
CBX2	chromobox homolog 2	NLRX1	NLR family member X1				HOXD12	homeobox D12	SS18L1	synovial sarcoma translocation gene on chromosome 18-like 1
CBX5	chromobox homolog 5	NME3	NME/NM23 nucleoside diphosphate kinase 3				HOXD13	homeobox D13	SSR1	signal sequence receptor, alpha
CBX6	chromobox homolog 6	NMT1	N-myristoyltransferase 1				HOXD9	homeobox D9	SSR3	signal sequence receptor, gamma (translocon-associated protein gamma)
CBX7	chromobox homolog 7	NNMT	nicotinamide N-methyltransferase				HP1BP3	heterochromatin protein 1, binding protein 3	SSUH2	ssu-2 homolog (C. elegans)
CBX8	chromobox homolog 8	NOA1	nitric oxide associated 1				HPGD	hydroxyprostaglandin dehydrogenase 15-(NAD)	ST13	suppression of tumorigenicity 13 (colon carcinoma) (Hsp70 interacting protein)
CCAR2	cell cycle and apoptosis regulator 2	NODAL	nodal growth differentiation factor				HPSE	heparanase	ST14	suppression of tumorigenicity 14 (colon carcinoma)
CCBE1	collagen and calcium binding EGF domains 1	NOL10	nucleolar protein 10				HPSE2	heparanase 2	ST18	suppression of tumorigenicity 18 (breast carcinoma) (zinc finger protein)
CCDC103	coiled-coil domain containing 103	NOL6	nucleolar protein 6 (RNA-associated)				HRASLS5	HRAS-like suppressor family, member 5	ST20-MTHFS	ST20-MTHFS readthrough
CCDC114	coiled-coil domain containing 114	NOP2	NOP2 nucleolar protein				HRK	harakiri, BCL2 interacting protein (contains only BH3 domain)	ST3GAL1	ST3 beta-galactoside alpha-2,3-sialyltransferase 1
CCDC117	coiled-coil domain containing 117	NOP9	NOP9 nucleolar protein				HS3ST1	heparan sulfate (glucosamine) 3-O-sulfotransferase 1	ST3GAL3	ST3 beta-galactoside alpha-2,3-sialyltransferase 3
CCDC121	coiled-coil domain containing 121	NOS1	nitric oxide synthase 1 (neuronal)				HS3ST3A1	heparan sulfate (glucosamine) 3-O-sulfotransferase 3A1	ST3GAL6	ST3 beta-galactoside alpha-2,3-sialyltransferase 6
CCDC125	coiled-coil domain containing 125	NOS1AP	nitric oxide synthase 1 (neuronal) adaptor protein				HS3ST3B1	heparan sulfate (glucosamine) 3-O-sulfotransferase 3B1	ST5	suppression of tumorigenicity 5
CCDC134	coiled-coil domain containing 134	NOVA2	neuro-oncological ventral antigen 2				HS3ST4	heparan sulfate (glucosamine) 3-O-sulfotransferase 4	ST6GAL1	ST6 beta-galactosamide alpha-2,6-sialyltranferase 1
CCDC141	coiled-coil domain containing 141	NPC1	Niemann-Pick disease, type C1				HS6ST2	heparan sulfate 6-O-sulfotransferase 2	ST6GAL2	ST6 beta-galactosamide alpha-2,6-sialyltranferase 2
CCDC144A	coiled-coil domain containing 144A	NPC2	Niemann-Pick disease, type C2				HS6ST3	heparan sulfate 6-O-sulfotransferase 3	ST6GALNAC3	ST6 (alpha-N-acetyl-neuraminyl-2,3-beta-galactosyl-1,3)-N-acetylgalactosaminide alpha-2,6-sialyltransferase 3
CCDC144NL	coiled-coil domain containing 144 family, N-terminal like	NPEPPS	aminopeptidase puromycin sensitive				HSDL2	hydroxysteroid dehydrogenase like 2	ST6GALNAC5	ST6 (alpha-N-acetyl-neuraminyl-2,3-beta-galactosyl-1,3)-N-acetylgalactosaminide alpha-2,6-sialyltransferase 5
CCDC149	coiled-coil domain containing 149	NPFFR1	neuropeptide FF receptor 1				HSF2	heat shock transcription factor 2	ST8SIA2	ST8 alpha-N-acetyl-neuraminide alpha-2,8-sialyltransferase 2
CCDC153	coiled-coil domain containing 153	NPFFR2	neuropeptide FF receptor 2				HSP90B1	heat shock protein 90kDa beta (Grp94), member 1	ST8SIA3	ST8 alpha-N-acetyl-neuraminide alpha-2,8-sialyltransferase 3
CCDC163P	coiled-coil domain containing 163, pseudogene	NPHS1	nephrosis 1, congenital, Finnish type (nephrin)				HSPA13	heat shock protein 70kDa family, member 13	ST8SIA6	ST8 alpha-N-acetyl-neuraminide alpha-2,8-sialyltransferase 6
CCDC171	coiled-coil domain containing 171	NPHS2	nephrosis 2, idiopathic, steroid-resistant (podocin)				HSPA4L	heat shock 70kDa protein 4-like	STAC	SH3 and cysteine rich domain
CCDC174	coiled-coil domain containing 174	NPRL3	nitrogen permease regulator-like 3 (S. cerevisiae)				HSPA5	heat shock 70kDa protein 5 (glucose-regulated protein, 78kDa)	STAG2	stromal antigen 2
CCDC177	Homo sapiens coiled-coil domain containing 177 (CCDC177), mRNA.	NPTXR	neuronal pentraxin receptor				HSPA6	heat shock 70kDa protein 6 (HSP70B')	STAMBPL1	STAM binding protein-like 1
CCDC180	coiled-coil domain containing 180	NQO1	NAD(P)H dehydrogenase, quinone 1				HSPA9	heat shock 70kDa protein 9 (mortalin)	STAR	steroidogenic acute regulatory protein
CCDC23	coiled-coil domain containing 23	NR1D2	nuclear receptor subfamily 1, group D, member 2				HSPB7	heat shock 27kDa protein family, member 7 (cardiovascular)	STARD13	StAR-related lipid transfer (START) domain containing 13
CCDC38	coiled-coil domain containing 38	NR2C2	nuclear receptor subfamily 2, group C, member 2				HSPBAP1	HSPB (heat shock 27kDa) associated protein 1	STARD5	StAR-related lipid transfer (START) domain containing 5
CCDC47	coiled-coil domain containing 47	NR3C1	nuclear receptor subfamily 3, group C, member 1 (glucocorticoid receptor)				HSPE1	heat shock 10kDa protein 1 (chaperonin 10)	STAT1	signal transducer and activator of transcription 1, 91kDa
CCDC74A	coiled-coil domain containing 74A	NR5A2	nuclear receptor subfamily 5, group A, member 2				HSPE1-MOB4	HSPE1-MOB4 readthrough	STAT2	signal transducer and activator of transcription 2, 113kDa
CCDC74B	coiled-coil domain containing 74B	NR6A1	nuclear receptor subfamily 6, group A, member 1				HTR2A	5-hydroxytryptamine (serotonin) receptor 2A, G protein-coupled	STAT5B	signal transducer and activator of transcription 5B
CCDC77	coiled-coil domain containing 77	NRAS	neuroblastoma RAS viral (v-ras) oncogene homolog				HTR2C	5-hydroxytryptamine (serotonin) receptor 2C, G protein-coupled	STAU1	staufen double-stranded RNA binding protein 1
CCDC80	coiled-coil domain containing 80	NRCAM	neuronal cell adhesion molecule				HTR4	5-hydroxytryptamine (serotonin) receptor 4, G protein-coupled	STC1	stanniocalcin 1
CCDC86	coiled-coil domain containing 86	NRG1	neuregulin 1				HTR5A	5-hydroxytryptamine (serotonin) receptor 5A, G protein-coupled	STC2	stanniocalcin 2
CCDC90B	coiled-coil domain containing 90B	NRIP2	nuclear receptor interacting protein 2				HTR6	5-hydroxytryptamine (serotonin) receptor 6, G protein-coupled	STEAP2	STEAP family member 2, metalloreductase
CCDC92	coiled-coil domain containing 92	NRP2	neuropilin 2				HTRA1	HtrA serine peptidase 1	STEAP3	STEAP family member 3, metalloreductase
CCKAR	cholecystokinin A receptor	NRSN1	neurensin 1				HUNK	hormonally up-regulated Neu-associated kinase	STIM1	stromal interaction molecule 1
CCL1	chemokine (C-C motif) ligand 1	NRXN3	neurexin 3				HYOU1	hypoxia up-regulated 1	STIP1	stress-induced-phosphoprotein 1
CCL22	chemokine (C-C motif) ligand 22	NSF	N-ethylmaleimide-sensitive factor				HYPK	huntingtin interacting protein K	STK17B	serine/threonine kinase 17b
CCL27	chemokine (C-C motif) ligand 27	NSL1	NSL1, MIS12 kinetochore complex component				IAH1	isoamyl acetate-hydrolyzing esterase 1 homolog (S. cerevisiae)	STK25	serine/threonine kinase 25
CCNB1	cyclin B1	NSUN3	NOP2/Sun domain family, member 3				IAPP	islet amyloid polypeptide	STK32A	serine/threonine kinase 32A
CCND2	cyclin D2	NSUN4	NOP2/Sun domain family, member 4				IBA57	IBA57, iron-sulfur cluster assembly homolog (S. cerevisiae)	STK32B	serine/threonine kinase 32B
CCNH	cyclin H	NT5C1A	5'-nucleotidase, cytosolic IA				ICA1L	islet cell autoantigen 1,69kDa-like	STK33	serine/threonine kinase 33
CCNK	cyclin K	NT5DC1	5'-nucleotidase domain containing 1				ICAM4	intercellular adhesion molecule 4 (Landsteiner-Wiener blood group)	STK36	serine/threonine kinase 36
CCNT1	cyclin T1	NTM	neurotrimin				ICOSLG	inducible T-cell co-stimulator ligand	STK4	serine/threonine kinase 4
CCNT2	cyclin T2	NTN1	netrin 1				ID3	inhibitor of DNA binding 3, dominant negative helix-loop-helix protein	STOML3	stomatin (EPB72)-like 3
CCNY	cyclin Y	NTRK2	neurotrophic tyrosine kinase, receptor, type 2				IDE	insulin-degrading enzyme	STON2	stonin 2
CCNYL1	cyclin Y-like 1	NTSR1	neurotensin receptor 1 (high affinity)				IDH2	isocitrate dehydrogenase 2 (NADP+), mitochondrial	STRADA	STE20-related kinase adaptor alpha
CCP110	centriolar coiled coil protein 110kDa	NUBPL	nucleotide binding protein-like				IDH3A	isocitrate dehydrogenase 3 (NAD+) alpha	STRIP1	striatin interacting protein 1
CCR1	chemokine (C-C motif) receptor 1	NUDCD2	NudC domain containing 2				IDI2	isopentenyl-diphosphate delta isomerase 2	STRIP2	striatin interacting protein 2
CCR2	chemokine (C-C motif) receptor 2	NUDCD3	NudC domain containing 3				IER3IP1	immediate early response 3 interacting protein 1	STX11	syntaxin 11
CCR7	chemokine (C-C motif) receptor 7	NUDT16	nudix (nucleoside diphosphate linked moiety X)-type motif 16				IFI27	interferon, alpha-inducible protein 27	STX12	syntaxin 12
CCS	copper chaperone for superoxide dismutase	NUDT16L1	nudix (nucleoside diphosphate linked moiety X)-type motif 16-like 1				IFI44L	interferon-induced protein 44-like	STX16	syntaxin 16
CCSER1	coiled-coil serine-rich protein 1	NUDT17	nudix (nucleoside diphosphate linked moiety X)-type motif 17				IFIT1	interferon-induced protein with tetratricopeptide repeats 1	STX4	syntaxin 4
CCSER2	coiled-coil serine-rich protein 2	NUDT3	nudix (nucleoside diphosphate linked moiety X)-type motif 3				IFLTD1	intermediate filament tail domain containing 1	STX7	syntaxin 7
CD177	CD177 molecule	NUDT5	nudix (nucleoside diphosphate linked moiety X)-type motif 5				IFNA6	interferon, alpha 6	STXBP4	syntaxin binding protein 4
CD180	CD180 molecule	NUDT7	nudix (nucleoside diphosphate linked moiety X)-type motif 7				IFNAR2	interferon (alpha, beta and omega) receptor 2	SUB1	SUB1 homolog (S. cerevisiae)
CD1A	CD1a molecule	NUF2	NUF2, NDC80 kinetochore complex component				IFNE	interferon, epsilon	SUFU	suppressor of fused homolog (Drosophila)
CD1C	CD1c molecule	NUFIP1	nuclear fragile X mental retardation protein interacting protein 1				IFNLR1	interferon, lambda receptor 1	SUGT1	SGT1, suppressor of G2 allele of SKP1 (S. cerevisiae)
CD200	CD200 molecule	NUMBL	numb homolog (Drosophila)-like				IFRG15	Homo sapiens torsin A interacting protein 2 (TOR1AIP2), transcript variant 1, mRNA.	SULT1B1	sulfotransferase family, cytosolic, 1B, member 1
CD200R1	CD200 receptor 1	NUP155	nucleoporin 155kDa				IGDCC4	immunoglobulin superfamily, DCC subclass, member 4	SULT1C2	sulfotransferase family, cytosolic, 1C, member 2
CD209	CD209 molecule	NUP214	nucleoporin 214kDa				IGF1	insulin-like growth factor 1 (somatomedin C)	SULT2A1	sulfotransferase family, cytosolic, 2A, dehydroepiandrosterone (DHEA)-preferring, member 1
CD22	CD22 molecule	NUP43	nucleoporin 43kDa				IGF2	insulin-like growth factor 2 (somatomedin A)	SUMF1	sulfatase modifying factor 1
CD226	CD226 molecule	NUP62	nucleoporin 62kDa				IGF2BP2	insulin-like growth factor 2 mRNA binding protein 2	SUN2	Sad1 and UNC84 domain containing 2
CD248	CD248 molecule, endosialin	NUP62CL	nucleoporin 62kDa C-terminal like				IGF2BP3	insulin-like growth factor 2 mRNA binding protein 3	SUPT6H	suppressor of Ty 6 homolog (S. cerevisiae)
CD274	CD274 molecule	NUS1	nuclear undecaprenyl pyrophosphate synthase 1 homolog (S. cerevisiae)				IGF2R	insulin-like growth factor 2 receptor	SURF6	surfeit 6
CD276	CD276 molecule	NWD1	NACHT and WD repeat domain containing 1				IGFBP2	insulin-like growth factor binding protein 2, 36kDa	SUSD1	sushi domain containing 1
CD28	CD28 molecule	NXN	nucleoredoxin				IGFBP5	insulin-like growth factor binding protein 5	SUV39H2	suppressor of variegation 3-9 homolog 2 (Drosophila)
CD300E	CD300e molecule	NXPH1	neurexophilin 1				IGFBPL1	insulin-like growth factor binding protein-like 1	SUZ12	SUZ12 polycomb repressive complex 2 subunit
CD300LD	CD300 molecule-like family member d	NXT2	nuclear transport factor 2-like export factor 2				IGLL5	immunoglobulin lambda-like polypeptide 5	SV2B	synaptic vesicle glycoprotein 2B
CD302	CD302 molecule	NYNRIN	NYN domain and retroviral integrase containing				IGSF21	immunoglobin superfamily, member 21	SV2C	synaptic vesicle glycoprotein 2C
CD34	CD34 molecule	OAS2	2'-5'-oligoadenylate synthetase 2, 69/71kDa				IKBKAP	inhibitor of kappa light polypeptide gene enhancer in B-cells, kinase complex-associated protein	SVIP	small VCP/p97-interacting protein
CD38	CD38 molecule	OASL	2'-5'-oligoadenylate synthetase-like				IKBKB	inhibitor of kappa light polypeptide gene enhancer in B-cells, kinase beta	SVOP	SV2 related protein homolog (rat)
CD3D	CD3d molecule, delta (CD3-TCR complex)	OAZ1	ornithine decarboxylase antizyme 1				IKZF1	IKAROS family zinc finger 1 (Ikaros)	SYAP1	synapse associated protein 1
CD3EAP	CD3e molecule, epsilon associated protein	OBFC1	oligonucleotide/oligosaccharide-binding fold containing 1				IKZF2	IKAROS family zinc finger 2 (Helios)	SYN1	synapsin I
CD3G	CD3g molecule, gamma (CD3-TCR complex)	OCLN	occludin				IKZF3	IKAROS family zinc finger 3 (Aiolos)	SYNCRIP	synaptotagmin binding, cytoplasmic RNA interacting protein
CD4	CD4 molecule	OGFOD1	2-oxoglutarate and iron-dependent oxygenase domain containing 1				IKZF5	IKAROS family zinc finger 5 (Pegasus)	SYNDIG1L	synapse differentiation inducing 1-like
CD53	CD53 molecule	OGFOD2	2-oxoglutarate and iron-dependent oxygenase domain containing 2				IL10	interleukin 10	SYNE3	spectrin repeat containing, nuclear envelope family member 3
CD58	CD58 molecule	OGT	O-linked N-acetylglucosamine (GlcNAc) transferase				IL10RA	interleukin 10 receptor, alpha	SYNJ1	synaptojanin 1
CD74	CD74 molecule, major histocompatibility complex, class II invariant chain	OLA1	Obg-like ATPase 1				IL11	interleukin 11	SYNJ2	synaptojanin 2
CD84	CD84 molecule	OLFM2	olfactomedin 2				IL13RA1	interleukin 13 receptor, alpha 1	SYNJ2BP	synaptojanin 2 binding protein
CD8A	CD8a molecule	OLFM3	olfactomedin 3				IL17C	interleukin 17C	SYNPO2	synaptopodin 2
CD96	CD96 molecule	OLFM4	olfactomedin 4				IL17RA	interleukin 17 receptor A	SYNPO2L	synaptopodin 2-like
CD99	CD99 molecule	OLFML2A	olfactomedin-like 2A				IL17RD	interleukin 17 receptor D	SYNRG	synergin, gamma
CDC42EP4	CDC42 effector protein (Rho GTPase binding) 4	OLR1	oxidized low density lipoprotein (lectin-like) receptor 1				IL1RAP	interleukin 1 receptor accessory protein	SYPL2	synaptophysin-like 2
CDC42SE1	CDC42 small effector 1	ONECUT2	one cut homeobox 2				IL1RN	interleukin 1 receptor antagonist	SYT11	synaptotagmin XI
CDC42SE2	CDC42 small effector 2	ONECUT3	one cut homeobox 3				IL23A	interleukin 23, alpha subunit p19	SYT14	synaptotagmin XIV
CDC73	cell division cycle 73	OPA3	optic atrophy 3 (autosomal recessive, with chorea and spastic paraplegia)				IL6R	interleukin 6 receptor	SYT15	synaptotagmin XV
CDCA2	cell division cycle associated 2	OPALIN	oligodendrocytic myelin paranodal and inner loop protein				IL6ST	interleukin 6 signal transducer (gp130, oncostatin M receptor)	SYT17	synaptotagmin XVII
CDCA7	cell division cycle associated 7	OPCML	opioid binding protein/cell adhesion molecule-like				IL7R	interleukin 7 receptor	SYT2	synaptotagmin II
CDH11	cadherin 11, type 2, OB-cadherin (osteoblast)	OPN1MW	opsin 1 (cone pigments), medium-wave-sensitive				IL8	interleukin 8	SYT5	synaptotagmin V
CDH12	cadherin 12, type 2 (N-cadherin 2)	OPN1MW2	opsin 1 (cone pigments), medium-wave-sensitive 2				ILF2	interleukin enhancer binding factor 2	SYTL4	synaptotagmin-like 4
CDH3	cadherin 3, type 1, P-cadherin (placental)	OPRD1	opioid receptor, delta 1				IMPA2	inositol(myo)-1(or 4)-monophosphatase 2	SYVN1	synovial apoptosis inhibitor 1, synoviolin
CDH4	cadherin 4, type 1, R-cadherin (retinal)	OR1L8	olfactory receptor, family 1, subfamily L, member 8				IMPG1	interphotoreceptor matrix proteoglycan 1	SZRD1	SUZ RNA binding domain containing 1
CDH6	cadherin 6, type 2, K-cadherin (fetal kidney)	OR2B11	olfactory receptor, family 2, subfamily B, member 11				INADL	InaD-like (Drosophila)	TAB3	TGF-beta activated kinase 1/MAP3K7 binding protein 3
CDH7	cadherin 7, type 2	OR2H1	olfactory receptor, family 2, subfamily H, member 1				INCA1	inhibitor of CDK, cyclin A1 interacting protein 1	TACC1	transforming, acidic coiled-coil containing protein 1
CDK12	cyclin-dependent kinase 12	OR51E1	olfactory receptor, family 51, subfamily E, member 1				ING4	inhibitor of growth family, member 4	TACO1	translational activator of mitochondrially encoded cytochrome c oxidase I
CDK15	cyclin-dependent kinase 15	OR7D2	olfactory receptor, family 7, subfamily D, member 2				INHBB	inhibin, beta B	TACR1	tachykinin receptor 1
CDK17	cyclin-dependent kinase 17	ORAI2	ORAI calcium release-activated calcium modulator 2				INHBC	inhibin, beta C	TACR2	tachykinin receptor 2
CDK19	cyclin-dependent kinase 19	ORAOV1	oral cancer overexpressed 1				INPP4A	inositol polyphosphate-4-phosphatase, type I, 107kDa	TAF1A	TATA box binding protein (TBP)-associated factor, RNA polymerase I, A, 48kDa
CDK5R2	cyclin-dependent kinase 5, regulatory subunit 2 (p39)	ORC6	origin recognition complex, subunit 6				INPP4B	inositol polyphosphate-4-phosphatase, type II, 105kDa	TAF1D	TATA box binding protein (TBP)-associated factor, RNA polymerase I, D, 41kDa
CDK6	cyclin-dependent kinase 6	ORMDL2	ORM1-like 2 (S. cerevisiae)				INSL4	insulin-like 4 (placenta)	TAF2	TAF2 RNA polymerase II, TATA box binding protein (TBP)-associated factor, 150kDa
CDKAL1	CDK5 regulatory subunit associated protein 1-like 1	OSBP2	oxysterol binding protein 2				INSR	insulin receptor	TAF8	TAF8 RNA polymerase II, TATA box binding protein (TBP)-associated factor, 43kDa
CDKL1	cyclin-dependent kinase-like 1 (CDC2-related kinase)	OSBPL2	oxysterol binding protein-like 2				INTS6	integrator complex subunit 6	TANC2	tetratricopeptide repeat, ankyrin repeat and coiled-coil containing 2
CDKN2AIP	CDKN2A interacting protein	OSBPL7	oxysterol binding protein-like 7				INTS7	integrator complex subunit 7	TANGO6	transport and golgi organization 6 homolog (Drosophila)
CDON	cell adhesion associated, oncogene regulated	OSER1	oxidative stress responsive serine-rich 1				INTU	inturned planar cell polarity protein	TANK	TRAF family member-associated NFKB activator
CDR1as	circular RNA CDR1as	OSR1	odd-skipped related 1 (Drosophila)				IPO11	importin 11	TAOK1	TAO kinase 1
CDRT1	CMT1A duplicated region transcript 1	OSTF1	osteoclast stimulating factor 1				IPO9	importin 9	TAP2	transporter 2, ATP-binding cassette, sub-family B (MDR/TAP)
CDRT4	CMT1A duplicated region transcript 4	OTC	ornithine carbamoyltransferase				IQCE	IQ motif containing E	TARDBP	TAR DNA binding protein
CDS2	CDP-diacylglycerol synthase (phosphatidate cytidylyltransferase) 2	OTOG	otogelin				IQCJ	IQ motif containing J	TATDN2	TatD DNase domain containing 2
CDX2	caudal type homeobox 2	OTP	orthopedia homeobox				IQSEC1	IQ motif and Sec7 domain 1	TBC1D13	TBC1 domain family, member 13
CDYL	chromodomain protein, Y-like	OTUB2	OTU domain, ubiquitin aldehyde binding 2				IQSEC2	IQ motif and Sec7 domain 2	TBC1D14	TBC1 domain family, member 14
CEACAM1	carcinoembryonic antigen-related cell adhesion molecule 1 (biliary glycoprotein)	OTUD3	OTU domain containing 3				IRAK1BP1	interleukin-1 receptor-associated kinase 1 binding protein 1	TBC1D15	TBC1 domain family, member 15
CECR1	cat eye syndrome chromosome region, candidate 1	OTUD6A	OTU domain containing 6A				IRAK3	interleukin-1 receptor-associated kinase 3	TBC1D16	TBC1 domain family, member 16
CELF2	CUGBP, Elav-like family member 2	OTUD7A	OTU domain containing 7A				IREB2	iron-responsive element binding protein 2	TBC1D25	TBC1 domain family, member 25
CELF3	CUGBP, Elav-like family member 3	OTUD7B	OTU domain containing 7B				IRF2BP2	interferon regulatory factor 2 binding protein 2	TBC1D26	TBC1 domain family, member 26
CELSR1	cadherin, EGF LAG seven-pass G-type receptor 1	OTX1	orthodenticle homeobox 1				IRF2BPL	interferon regulatory factor 2 binding protein-like	TBC1D30	TBC1 domain family, member 30
CELSR2	cadherin, EGF LAG seven-pass G-type receptor 2	OVCH1-AS1	OVCH1 antisense RNA 1				IRF4	interferon regulatory factor 4	TBC1D4	TBC1 domain family, member 4
CENPA	centromere protein A	OXNAD1	oxidoreductase NAD-binding domain containing 1				IRF6	interferon regulatory factor 6	TBC1D5	TBC1 domain family, member 5
CENPL	centromere protein L	OXTR	oxytocin receptor				IRF8	interferon regulatory factor 8	TBCA	tubulin folding cofactor A
CENPM	centromere protein M	P2RX1	purinergic receptor P2X, ligand-gated ion channel, 1				IRGQ	immunity-related GTPase family, Q	TBCEL	tubulin folding cofactor E-like
CENPN	centromere protein N	P2RX2	purinergic receptor P2X, ligand-gated ion channel, 2				IRX5	iroquois homeobox 5	TBL1X	transducin (beta)-like 1X-linked
CENPP	centromere protein P	P2RX6	purinergic receptor P2X, ligand-gated ion channel, 6				IRX6	iroquois homeobox 6	TBPL1	TBP-like 1
CEP104	centrosomal protein 104kDa	P2RY10	purinergic receptor P2Y, G-protein coupled, 10				ISG20	interferon stimulated exonuclease gene 20kDa	TBX15	T-box 15
CEP164	centrosomal protein 164kDa	P2RY2	purinergic receptor P2Y, G-protein coupled, 2				ISG20L2	interferon stimulated exonuclease gene 20kDa-like 2	TBX18	T-box 18
CEP63	centrosomal protein 63kDa	P4HB	prolyl 4-hydroxylase, beta polypeptide				ISL2	ISL LIM homeobox 2	TBX20	T-box 20
CEP72	centrosomal protein 72kDa	PABPC4	poly(A) binding protein, cytoplasmic 4 (inducible form)				ISOC1	isochorismatase domain containing 1	TBX4	T-box 4
CER1	cerberus 1, DAN family BMP antagonist	PACS1	phosphofurin acidic cluster sorting protein 1				IST1	increased sodium tolerance 1 homolog (yeast)	TBX5	T-box 5
CERS3	ceramide synthase 3	PACSIN1	protein kinase C and casein kinase substrate in neurons 1				UBXN7	UBX domain protein 7	TC2N	tandem C2 domains, nuclear
CERS6	ceramide synthase 6	PAF1	Paf1, RNA polymerase II associated factor, homolog (S. cerevisiae)				UCK2	uridine-cytidine kinase 2	TCEA2	transcription elongation factor A (SII), 2
CES3	carboxylesterase 3	PAFAH1B2	platelet-activating factor acetylhydrolase 1b, catalytic subunit 2 (30kDa)				UEVLD	UEV and lactate/malate dehyrogenase domains	TCEAL4	transcription elongation factor A (SII)-like 4
CETN1	centrin, EF-hand protein, 1	PAFAH2	platelet-activating factor acetylhydrolase 2, 40kDa				UFC1	ubiquitin-fold modifier conjugating enzyme 1	TCEANC	transcription elongation factor A (SII) N-terminal and central domain containing
CFD	complement factor D (adipsin)	PAH	phenylalanine hydroxylase				UGGT1	UDP-glucose glycoprotein glucosyltransferase 1	TCEANC2	transcription elongation factor A (SII) N-terminal and central domain containing 2
CFHR2	complement factor H-related 2	PAIP2	poly(A) binding protein interacting protein 2				UGT2B4	UDP glucuronosyltransferase 2 family, polypeptide B4	TCEB1	transcription elongation factor B (SIII), polypeptide 1 (15kDa, elongin C)
CFL2	cofilin 2 (muscle)	PAK1	p21 protein (Cdc42/Rac)-activated kinase 1				UGT8	UDP glycosyltransferase 8	TCEB3	transcription elongation factor B (SIII), polypeptide 3 (110kDa, elongin A)
CGGBP1	CGG triplet repeat binding protein 1	PAK2	p21 protein (Cdc42/Rac)-activated kinase 2				UHMK1	U2AF homology motif (UHM) kinase 1	TCERG1	transcription elongation regulator 1
CGN	cingulin	PAK3	p21 protein (Cdc42/Rac)-activated kinase 3				UHRF1BP1	UHRF1 binding protein 1	TCF15	transcription factor 15 (basic helix-loop-helix)
CGRRF1	cell growth regulator with ring finger domain 1	PAK6	p21 protein (Cdc42/Rac)-activated kinase 6				UHRF1BP1L	UHRF1 binding protein 1-like	TCF20	transcription factor 20 (AR1)
CHAC1	ChaC, cation transport regulator homolog 1 (E. coli)	PALM2	paralemmin 2				ULBP1	UL16 binding protein 1	TCF21	transcription factor 21
CHAF1B	chromatin assembly factor 1, subunit B (p60)	PANX1	pannexin 1				ULBP3	UL16 binding protein 3	TCF4	transcription factor 4
CHCHD3	coiled-coil-helix-coiled-coil-helix domain containing 3	PAOX	polyamine oxidase (exo-N4-amino)				ULK2	unc-51 like autophagy activating kinase 2	TCHHL1	trichohyalin-like 1
CHD7	chromodomain helicase DNA binding protein 7	PAPD5	PAP associated domain containing 5				UMPS	uridine monophosphate synthetase	TCHP	trichoplein, keratin filament binding
CHDH	choline dehydrogenase	PAPOLG	poly(A) polymerase gamma				UNC119B	unc-119 homolog B (C. elegans)	TCIRG1	T-cell, immune regulator 1, ATPase, H+ transporting, lysosomal V0 subunit A3
CHEK1	checkpoint kinase 1	PAPPA2	pappalysin 2				UNC13A	unc-13 homolog A (C. elegans)	TCTA	T-cell leukemia translocation altered
CHID1	chitinase domain containing 1	PAQR4	progestin and adipoQ receptor family member IV				UNC13B	unc-13 homolog B (C. elegans)	TCTEX1D1	Tctex1 domain containing 1
CHKA	choline kinase alpha	PAQR5	progestin and adipoQ receptor family member V				UNC45B	unc-45 homolog B (C. elegans)	TDGF1	teratocarcinoma-derived growth factor 1
CHML	choroideremia-like (Rab escort protein 2)	PARK2	parkin RBR E3 ubiquitin protein ligase				UNC5B	unc-5 homolog B (C. elegans)	TECPR2	tectonin beta-propeller repeat containing 2
CHMP3	charged multivesicular body protein 3	PARL	presenilin associated, rhomboid-like				UNC5C	unc-5 homolog C (C. elegans)	TENM3	teneurin transmembrane protein 3
CHMP7	charged multivesicular body protein 7	PARP15	poly (ADP-ribose) polymerase family, member 15				UNC5CL	unc-5 homolog C (C. elegans)-like	TENM4	teneurin transmembrane protein 4
CHRAC1	chromatin accessibility complex 1	PARP2	poly (ADP-ribose) polymerase 2				UNC5D	unc-5 homolog D (C. elegans)	TEPP	testis, prostate and placenta expressed
CHRDL1	chordin-like 1	PARVA	parvin, alpha				UPK3B	uroplakin 3B	TERF1	telomeric repeat binding factor (NIMA-interacting) 1
CHRM1	cholinergic receptor, muscarinic 1	PARVB	parvin, beta				URB1	URB1 ribosome biogenesis 1 homolog (S. cerevisiae)	TESC	tescalcin
CHRM3	cholinergic receptor, muscarinic 3	PARVG	parvin, gamma				URGCP	upregulator of cell proliferation	TET2	tet methylcytosine dioxygenase 2
CHRM5	cholinergic receptor, muscarinic 5	PATE2	prostate and testis expressed 2				URM1	ubiquitin related modifier 1	TET3	tet methylcytosine dioxygenase 3
CHRNB2	cholinergic receptor, nicotinic, beta 2 (neuronal)	PATL1	protein associated with topoisomerase II homolog 1 (yeast)				UROS	uroporphyrinogen III synthase	TEX22	testis expressed 22
CHRND	cholinergic receptor, nicotinic, delta (muscle)	PAWR	PRKC, apoptosis, WT1, regulator				USB1	U6 snRNA biogenesis 1	TFAM	transcription factor A, mitochondrial
CHRNE	cholinergic receptor, nicotinic, epsilon (muscle)	PAX5	paired box 5				USP2	ubiquitin specific peptidase 2	TFAP2B	transcription factor AP-2 beta (activating enhancer binding protein 2 beta)
CHRNG	cholinergic receptor, nicotinic, gamma (muscle)	PAX6	paired box 6				USP3	ubiquitin specific peptidase 3	TFCP2L1	transcription factor CP2-like 1
CHST10	carbohydrate sulfotransferase 10	PBOV1	prostate and breast cancer overexpressed 1				USP31	ubiquitin specific peptidase 31	TFEC	transcription factor EC
CHST11	carbohydrate (chondroitin 4) sulfotransferase 11	PBX1	pre-B-cell leukemia homeobox 1				USP33	ubiquitin specific peptidase 33	TFPI	tissue factor pathway inhibitor (lipoprotein-associated coagulation inhibitor)
CHST12	carbohydrate (chondroitin 4) sulfotransferase 12	PCBD2	pterin-4 alpha-carbinolamine dehydratase/dimerization cofactor of hepatocyte nuclear factor 1 alpha (TCF1) 2				USP37	ubiquitin specific peptidase 37	TFRC	transferrin receptor
CHST14	carbohydrate (N-acetylgalactosamine 4-0) sulfotransferase 14	PCCB	propionyl CoA carboxylase, beta polypeptide				USP38	ubiquitin specific peptidase 38	TGFBR1	transforming growth factor, beta receptor 1
CHSY1	chondroitin sulfate synthase 1	PCDH10	protocadherin 10				USP47	ubiquitin specific peptidase 47	TGFBR2	transforming growth factor, beta receptor II (70/80kDa)
CHTF8	CTF8, chromosome transmission fidelity factor 8 homolog (S. cerevisiae)	PCDH17	protocadherin 17				USP6	ubiquitin specific peptidase 6 (Tre-2 oncogene)	TGM2	transglutaminase 2
CIITA	class II, major histocompatibility complex, transactivator	PCDH19	protocadherin 19				USP6NL	USP6 N-terminal like	TGM3	transglutaminase 3
CIR1	corepressor interacting with RBPJ, 1	PCDH20	protocadherin 20				UST	uronyl-2-sulfotransferase	THOC5	THO complex 5
CISD3	CDGSH iron sulfur domain 3	PCDH7	protocadherin 7				UTP14C	UTP14, U3 small nucleolar ribonucleoprotein, homolog C (yeast)	THRB	thyroid hormone receptor, beta
CIT	citron (rho-interacting, serine/threonine kinase 21)	PCDH8	protocadherin 8				UTP23	UTP23, small subunit (SSU) processome component, homolog (yeast)	THSD7A	thrombospondin, type I, domain containing 7A
CITED2	Cbp/p300-interacting transactivator, with Glu/Asp-rich carboxy-terminal domain, 2	PCDH9	protocadherin 9				VANGL1	VANGL planar cell polarity protein 1	THTPA	thiamine triphosphatase
CKAP2L	cytoskeleton associated protein 2-like	PCF11	PCF11 cleavage and polyadenylation factor subunit				VANGL2	VANGL planar cell polarity protein 2	THY1	Thy-1 cell surface antigen
CLCF1	cardiotrophin-like cytokine factor 1	PCGF5	polycomb group ring finger 5				VAPA	VAMP (vesicle-associated membrane protein)-associated protein A, 33kDa	TIA1	TIA1 cytotoxic granule-associated RNA binding protein
CLCN3	chloride channel, voltage-sensitive 3	PCK1	phosphoenolpyruvate carboxykinase 1 (soluble)				VASH2	vasohibin 2	TIAF1	TGFB1-induced anti-apoptotic factor 1
CLCN4	chloride channel, voltage-sensitive 4	PCNP	PEST proteolytic signal containing nuclear protein				VAT1	vesicle amine transport 1	TIFA	TRAF-interacting protein with forkhead-associated domain
CLCN6	chloride channel, voltage-sensitive 6	PCNXL2	pecanex-like 2 (Drosophila)				VBP1	von Hippel-Lindau binding protein 1	TIFAB	TRAF-interacting protein with forkhead-associated domain, family member B
CLDN11	claudin 11	PCSK1	proprotein convertase subtilisin/kexin type 1				VCL	vinculin	TIGD6	tigger transposable element derived 6
CLDN16	claudin 16	PCSK9	proprotein convertase subtilisin/kexin type 9				VDR	vitamin D (1,25- dihydroxyvitamin D3) receptor	TIMD4	T-cell immunoglobulin and mucin domain containing 4
CLEC12B	C-type lectin domain family 12, member B	PCYOX1	prenylcysteine oxidase 1				VEZF1	vascular endothelial zinc finger 1	TIMELESS	timeless circadian clock
CLEC4C	C-type lectin domain family 4, member C	PCYOX1L	prenylcysteine oxidase 1 like				VGF	VGF nerve growth factor inducible	TIMM50	translocase of inner mitochondrial membrane 50 homolog (S. cerevisiae)
CLEC4E	C-type lectin domain family 4, member E	PCYT1A	phosphate cytidylyltransferase 1, choline, alpha				VGLL2	vestigial like 2 (Drosophila)	TIMM8A	translocase of inner mitochondrial membrane 8 homolog A (yeast)
CLEC5A	C-type lectin domain family 5, member A	PDE11A	phosphodiesterase 11A				VGLL3	vestigial like 3 (Drosophila)	TIMM8B	translocase of inner mitochondrial membrane 8 homolog B (yeast)
CLIC4	chloride intracellular channel 4	PDE12	phosphodiesterase 12				VHL	von Hippel-Lindau tumor suppressor, E3 ubiquitin protein ligase	TIMP4	TIMP metallopeptidase inhibitor 4
CLIC5	chloride intracellular channel 5	PDE1B	phosphodiesterase 1B, calmodulin-dependent				VIL1	villin 1	TIRAP	toll-interleukin 1 receptor (TIR) domain containing adaptor protein
CLIP1	CAP-GLY domain containing linker protein 1	PDE3A	phosphodiesterase 3A, cGMP-inhibited				VIPR1	vasoactive intestinal peptide receptor 1	TJP1	tight junction protein 1
CLK3	CDC-like kinase 3	PDE4A	phosphodiesterase 4A, cAMP-specific				VKORC1	vitamin K epoxide reductase complex, subunit 1	TLDC1	TBC/LysM-associated domain containing 1
CLLU1	chronic lymphocytic leukemia up-regulated 1	PDE4C	phosphodiesterase 4C, cAMP-specific				VLDLR	very low density lipoprotein receptor	TLE1	transducin-like enhancer of split 1 (E(sp1) homolog, Drosophila)
CLMN	calmin (calponin-like, transmembrane)	PDE4DIP	phosphodiesterase 4D interacting protein				VMP1	vacuole membrane protein 1	TLE3	transducin-like enhancer of split 3 (E(sp1) homolog, Drosophila)
CLN3	ceroid-lipofuscinosis, neuronal 3	PDGFB	platelet-derived growth factor beta polypeptide				VNN3	vanin 3	TLK2	tousled-like kinase 2
CLN5	ceroid-lipofuscinosis, neuronal 5	PDGFC	platelet derived growth factor C				VPS13A	vacuolar protein sorting 13 homolog A (S. cerevisiae)	TLL2	tolloid-like 2
CLOCK	clock circadian regulator	PDGFD	platelet derived growth factor D				VPS13B	vacuolar protein sorting 13 homolog B (yeast)	TLR4	toll-like receptor 4
CLPB	ClpB caseinolytic peptidase B homolog (E. coli)	PDHB	pyruvate dehydrogenase (lipoamide) beta				VPS13C	vacuolar protein sorting 13 homolog C (S. cerevisiae)	TLR5	toll-like receptor 5
CLPP	caseinolytic mitochondrial matrix peptidase proteolytic subunit	PDK1	pyruvate dehydrogenase kinase, isozyme 1				VPS18	vacuolar protein sorting 18 homolog (S. cerevisiae)	TLR8	toll-like receptor 8
CLSPN	claspin	PDLIM3	PDZ and LIM domain 3				VPS26A	vacuolar protein sorting 26 homolog A (S. pombe)	TM2D3	TM2 domain containing 3
CLSTN2	calsyntenin 2	PDLIM5	PDZ and LIM domain 5				VPS45	vacuolar protein sorting 45 homolog (S. cerevisiae)	TM4SF19	transmembrane 4 L six family member 19
CLTB	clathrin, light chain B	PDP2	pyruvate dehyrogenase phosphatase catalytic subunit 2				VPS4A	vacuolar protein sorting 4 homolog A (S. cerevisiae)	TM4SF5	transmembrane 4 L six family member 5
CLTC	clathrin, heavy chain (Hc)	PDPR	pyruvate dehydrogenase phosphatase regulatory subunit				VPS52	vacuolar protein sorting 52 homolog (S. cerevisiae)	TM9SF3	transmembrane 9 superfamily member 3
CLTCL1	clathrin, heavy chain-like 1	PDXK	pyridoxal (pyridoxine, vitamin B6) kinase				VPS53	vacuolar protein sorting 53 homolog (S. cerevisiae)	TM9SF4	transmembrane 9 superfamily protein member 4
CLVS1	clavesin 1	PDZD2	PDZ domain containing 2				VRK2	vaccinia related kinase 2	TMBIM4	transmembrane BAX inhibitor motif containing 4
CLVS2	clavesin 2	PEF1	penta-EF-hand domain containing 1				VSIG1	V-set and immunoglobulin domain containing 1	TMBIM6	transmembrane BAX inhibitor motif containing 6
CLYBL	citrate lyase beta like	PEG10	paternally expressed 10				VSIG10	V-set and immunoglobulin domain containing 10	TMC7	transmembrane channel-like 7
CMBL	carboxymethylenebutenolidase homolog (Pseudomonas)	PELI2	pellino E3 ubiquitin protein ligase family member 2				VSTM1	V-set and transmembrane domain containing 1	TMCO1	transmembrane and coiled-coil domains 1
CMC1	COX assembly mitochondrial protein 1 homolog (S. cerevisiae)	PELI3	pellino E3 ubiquitin protein ligase family member 3				VSTM4	V-set and transmembrane domain containing 4	TMED2	transmembrane emp24 domain trafficking protein 2
CMIP	c-Maf inducing protein	PELO	pelota homolog (Drosophila)				VSTM5	V-set and transmembrane domain containing 5	TMED5	transmembrane emp24 protein transport domain containing 5
CMKLR1	chemokine-like receptor 1	PER1	period circadian clock 1				VTA1	vesicle (multivesicular body) trafficking 1	TMED7	transmembrane emp24 protein transport domain containing 7
CMSS1	cms1 ribosomal small subunit homolog (yeast)	PEX19	peroxisomal biogenesis factor 19				VTCN1	V-set domain containing T cell activation inhibitor 1	TMEM104	transmembrane protein 104
CNBP	CCHC-type zinc finger, nucleic acid binding protein	PEX26	peroxisomal biogenesis factor 26				VTI1A	vesicle transport through interaction with t-SNAREs 1A	TMEM106A	transmembrane protein 106A
CNDP1	carnosine dipeptidase 1 (metallopeptidase M20 family)	PGAM5	phosphoglycerate mutase family member 5				VWC2	von Willebrand factor C domain containing 2	TMEM106C	transmembrane protein 106C
CNDP2	CNDP dipeptidase 2 (metallopeptidase M20 family)	PGAP1	post-GPI attachment to proteins 1				WASF3	WAS protein family, member 3	TMEM109	transmembrane protein 109
CNGB3	cyclic nucleotide gated channel beta 3	PGD	phosphogluconate dehydrogenase				WBP1L	WW domain binding protein 1-like	TMEM11	transmembrane protein 11
CNIH2	cornichon family AMPA receptor auxiliary protein 2	PGK1	phosphoglycerate kinase 1				WBP2NL	WBP2 N-terminal like	TMEM114	transmembrane protein 114
CNKSR3	CNKSR family member 3	PGLS	6-phosphogluconolactonase				WBSCR16	Williams-Beuren syndrome chromosome region 16	TMEM117	transmembrane protein 117
CNNM1	cyclin M1	PGLYRP1	peptidoglycan recognition protein 1				WDFY3	WD repeat and FYVE domain containing 3	TMEM119	transmembrane protein 119
CNNM2	cyclin M2	PGLYRP3	peptidoglycan recognition protein 3				WDHD1	WD repeat and HMG-box DNA binding protein 1	TMEM120B	transmembrane protein 120B
CNOT6	CCR4-NOT transcription complex, subunit 6	PGR	progesterone receptor				WDPCP	WD repeat containing planar cell polarity effector	TMEM127	transmembrane protein 127
CNOT7	CCR4-NOT transcription complex, subunit 7	PHACTR2	phosphatase and actin regulator 2				WDR13	WD repeat domain 13	TMEM130	transmembrane protein 130
CNP	2',3'-cyclic nucleotide 3' phosphodiesterase	PHACTR4	phosphatase and actin regulator 4				WDR17	WD repeat domain 17	TMEM134	transmembrane protein 134
CNR2	cannabinoid receptor 2 (macrophage)	PHAX	phosphorylated adaptor for RNA export				WDR26	WD repeat domain 26	TMEM135	transmembrane protein 135
CNTD2	cyclin N-terminal domain containing 2	PHB2	prohibitin 2				WDR3	WD repeat domain 3	TMEM136	transmembrane protein 136
CNTF	ciliary neurotrophic factor	PHC1	polyhomeotic homolog 1 (Drosophila)				WDR31	WD repeat domain 31	TMEM140	transmembrane protein 140
CNTN3	contactin 3 (plasmacytoma associated)	PHC2	polyhomeotic homolog 2 (Drosophila)				WDR33	WD repeat domain 33	TMEM141	transmembrane protein 141
CNTNAP5	contactin associated protein-like 5	PHC3	polyhomeotic homolog 3 (Drosophila)				WDR36	WD repeat domain 36	TMEM145	transmembrane protein 145
COA5	cytochrome c oxidase assembly factor 5	PHEX	phosphate regulating endopeptidase homolog, X-linked				WDR41	WD repeat domain 41	TMEM151A	transmembrane protein 151A
COBLL1	cordon-bleu WH2 repeat protein-like 1	PHF12	PHD finger protein 12				WDR44	WD repeat domain 44	TMEM159	transmembrane protein 159
COCH	cochlin	PHF13	PHD finger protein 13				WDR52	WD repeat domain 52	TMEM165	transmembrane protein 165
COG5	component of oligomeric golgi complex 5	PHF15	PHD finger protein 15				WDR5B	WD repeat domain 5B	TMEM167A	transmembrane protein 167A
COG6	component of oligomeric golgi complex 6	PHF20	PHD finger protein 20				WDR65	WD repeat domain 65	TMEM170A	transmembrane protein 170A
COL10A1	collagen, type X, alpha 1	PHF20L1	PHD finger protein 20-like 1				WDR77	WD repeat domain 77	TMEM170B	transmembrane protein 170B
COL20A1	collagen, type XX, alpha 1	PHF21A	PHD finger protein 21A				WDR92	WD repeat domain 92	TMEM173	transmembrane protein 173
COL22A1	collagen, type XXII, alpha 1	PHF8	PHD finger protein 8				WFDC13	WAP four-disulfide core domain 13	TMEM175	transmembrane protein 175
COL23A1	collagen, type XXIII, alpha 1	PHIP	pleckstrin homology domain interacting protein				WFS1	Wolfram syndrome 1 (wolframin)	TMEM178B	transmembrane protein 178B
COL4A1	collagen, type IV, alpha 1	PHKG1	phosphorylase kinase, gamma 1 (muscle)				WIPF1	WAS/WASL interacting protein family, member 1	TMEM180	transmembrane protein 180
COL4A3BP	collagen, type IV, alpha 3 (Goodpasture antigen) binding protein	PHKG2	phosphorylase kinase, gamma 2 (testis)				WIPF2	WAS/WASL interacting protein family, member 2	TMEM183A	transmembrane protein 183A
COL4A5	collagen, type IV, alpha 5	PHLDA1	pleckstrin homology-like domain, family A, member 1				WISP1	WNT1 inducible signaling pathway protein 1	TMEM194A	transmembrane protein 194A
COL8A1	collagen, type VIII, alpha 1	PHLPP2	PH domain and leucine rich repeat protein phosphatase 2				WNK3	WNK lysine deficient protein kinase 3	TMEM199	transmembrane protein 199
COL8A2	collagen, type VIII, alpha 2	PHYH	phytanoyl-CoA 2-hydroxylase				WNT2B	wingless-type MMTV integration site family, member 2B	TMEM200C	transmembrane protein 200C
COL9A3	collagen, type IX, alpha 3	PI16	peptidase inhibitor 16				WNT3	wingless-type MMTV integration site family, member 3	TMEM216	transmembrane protein 216
COLEC10	collectin sub-family member 10 (C-type lectin)	PI4K2A	Phosphatidylinositol 4-kinase type 2-alpha; Uncharacterized protein				WNT3A	wingless-type MMTV integration site family, member 3A	TMEM218	transmembrane protein 218
COLEC11	collectin sub-family member 11	PIAS2	protein inhibitor of activated STAT, 2				WNT5A	wingless-type MMTV integration site family, member 5A	TMEM220	transmembrane protein 220
COLQ	collagen-like tail subunit (single strand of homotrimer) of asymmetric acetylcholinesterase	PIAS4	protein inhibitor of activated STAT, 4				WNT8B	wingless-type MMTV integration site family, member 8B	TMEM221	transmembrane protein 221
COMMD2	COMM domain containing 2	PIFO	primary cilia formation				WNT9B	wingless-type MMTV integration site family, member 9B	TMEM223	transmembrane protein 223
COMMD9	COMM domain containing 9	PIGG	phosphatidylinositol glycan anchor biosynthesis, class G				WRB	tryptophan rich basic protein	TMEM225	transmembrane protein 225
COMTD1	catechol-O-methyltransferase domain containing 1	PIGK	phosphatidylinositol glycan anchor biosynthesis, class K				WSB1	WD repeat and SOCS box containing 1	TMEM229A	transmembrane protein 229A
COPS2	COP9 signalosome subunit 2	PIGL	phosphatidylinositol glycan anchor biosynthesis, class L				WSCD1	WSC domain containing 1	TMEM229B	transmembrane protein 229B
COPS4	COP9 signalosome subunit 4	PIGP	phosphatidylinositol glycan anchor biosynthesis, class P				WSCD2	WSC domain containing 2	TMEM231	transmembrane protein 231
COPS7B	COP9 signalosome subunit 7B	PIGX	phosphatidylinositol glycan anchor biosynthesis, class X				WT1	Wilms tumor 1	TMEM236	transmembrane protein 236
COPS8	COP9 signalosome subunit 8	PIK3AP1	phosphoinositide-3-kinase adaptor protein 1				WTIP	Wilms tumor 1 interacting protein	TMEM239	transmembrane protein 239
COPZ1	coatomer protein complex, subunit zeta 1	PIK3CA	phosphatidylinositol-4,5-bisphosphate 3-kinase, catalytic subunit alpha				WWC1	WW and C2 domain containing 1	TMEM242	transmembrane protein 242
COQ10B	coenzyme Q10 homolog B (S. cerevisiae)	PIK3CB	phosphatidylinositol-4,5-bisphosphate 3-kinase, catalytic subunit beta				WWC2	WW and C2 domain containing 2	TMEM246	transmembrane protein 246
COQ4	coenzyme Q4 homolog (S. cerevisiae)	PIK3R3	phosphoinositide-3-kinase, regulatory subunit 3 (gamma)				XAGE2	X antigen family, member 2	TMEM251	transmembrane protein 251
COQ9	coenzyme Q9 homolog (S. cerevisiae)	PIM1	pim-1 oncogene				XAGE2B	X antigen family, member 2B	TMEM254	transmembrane protein 254
CORO1C	coronin, actin binding protein, 1C	PIP4K2B	phosphatidylinositol-5-phosphate 4-kinase, type II, beta				XAGE3	X antigen family, member 3	TMEM255A	transmembrane protein 255A
CORO2A	coronin, actin binding protein, 2A	PIP4K2C	phosphatidylinositol-5-phosphate 4-kinase, type II, gamma				XAGE5	X antigen family, member 5	TMEM257	transmembrane protein 257
CORO2B	coronin, actin binding protein, 2B	PIP5K1C	phosphatidylinositol-4-phosphate 5-kinase, type I, gamma				XCR1	chemokine (C motif) receptor 1	TMEM41B	transmembrane protein 41B
COX16	COX16 cytochrome c oxidase assembly homolog (S. cerevisiae)	PIPOX	pipecolic acid oxidase				XG	Xg blood group	TMEM43	transmembrane protein 43
COX17	COX17 cytochrome c oxidase copper chaperone	PIRT	phosphoinositide-interacting regulator of transient receptor potential channels				XIRP1	xin actin-binding repeat containing 1	TMEM44	transmembrane protein 44
COX18	COX18 cytochrome C oxidase assembly factor	PITHD1	PITH (C-terminal proteasome-interacting domain of thioredoxin-like) domain containing 1				XK	X-linked Kx blood group (McLeod syndrome)	TMEM59L	transmembrane protein 59-like
COX19	cytochrome c oxidase assembly homolog 19 (S. cerevisiae)	PITPNB	phosphatidylinositol transfer protein, beta				XKR4	XK, Kell blood group complex subunit-related family, member 4	TMEM65	transmembrane protein 65
COX6B1	cytochrome c oxidase subunit VIb polypeptide 1 (ubiquitous)	PITPNC1	phosphatidylinositol transfer protein, cytoplasmic 1				XKR6	XK, Kell blood group complex subunit-related family, member 6	TMEM87A	transmembrane protein 87A
COX7B	cytochrome c oxidase subunit VIIb	PITPNM2	phosphatidylinositol transfer protein, membrane-associated 2				XKR7	XK, Kell blood group complex subunit-related family, member 7	TMEM98	transmembrane protein 98
CP	ceruloplasmin (ferroxidase)	PIWIL2	piwi-like RNA-mediated gene silencing 2				XKR9	XK, Kell blood group complex subunit-related family, member 9	TMLHE	trimethyllysine hydroxylase, epsilon
CPE	carboxypeptidase E	PKD2	polycystic kidney disease 2 (autosomal dominant)				XPNPEP2	X-prolyl aminopeptidase (aminopeptidase P) 2, membrane-bound	TMOD2	tropomodulin 2 (neuronal)
CPEB2	cytoplasmic polyadenylation element binding protein 2	PKDCC	protein kinase domain containing, cytoplasmic				XPO4	exportin 4	TMPO	thymopoietin
CPLX2	complexin 2	PKHD1	polycystic kidney and hepatic disease 1 (autosomal recessive)				XPO7	exportin 7	TMPPE	transmembrane protein with metallophosphoesterase domain
CPLX4	complexin 4	PKHD1L1	polycystic kidney and hepatic disease 1 (autosomal recessive)-like 1				XPR1	xenotropic and polytropic retrovirus receptor 1	TMPRSS2	transmembrane protease, serine 2
CPNE6	copine VI (neuronal)	PKIA	protein kinase (cAMP-dependent, catalytic) inhibitor alpha				XRCC3	X-ray repair complementing defective repair in Chinese hamster cells 3	TMPRSS4	transmembrane protease, serine 4
CPS1	carbamoyl-phosphate synthase 1, mitochondrial	PKLR	pyruvate kinase, liver and RBC				XRCC5	X-ray repair complementing defective repair in Chinese hamster cells 5 (double-strand-break rejoining)	TMX2	thioredoxin-related transmembrane protein 2
CPT1C	carnitine palmitoyltransferase 1C	PKP4	plakophilin 4				XRN1	5'-3' exoribonuclease 1	TMX3	thioredoxin-related transmembrane protein 3
CRCP	CGRP receptor component	PLA2G16	phospholipase A2, group XVI				XRRA1	X-ray radiation resistance associated 1	TNC	tenascin C
CREB5	cAMP responsive element binding protein 5	PLA2G1B	phospholipase A2, group IB (pancreas)				XXbac-BPG32J3.20		TNFAIP8L3	tumor necrosis factor, alpha-induced protein 8-like 3
CREG2	cellular repressor of E1A-stimulated genes 2	PLA2G2D	phospholipase A2, group IID				XYLB	xylulokinase homolog (H. influenzae)	TNFRSF10A	tumor necrosis factor receptor superfamily, member 10a
CRIPT	cysteine-rich PDZ-binding protein	PLA2G2F	phospholipase A2, group IIF				XYLT1	xylosyltransferase I	TNFRSF13C	tumor necrosis factor receptor superfamily, member 13C
CRISPLD1	cysteine-rich secretory protein LCCL domain containing 1	PLA2G4D	phospholipase A2, group IVD (cytosolic)				YAE1D1	Yae1 domain containing 1	TNFSF12-TNFSF13	TNFSF12-TNFSF13 readthrough
CRISPLD2	cysteine-rich secretory protein LCCL domain containing 2	PLA2R1	phospholipase A2 receptor 1, 180kDa				YARS2	tyrosyl-tRNA synthetase 2, mitochondrial	TNFSF13	tumor necrosis factor (ligand) superfamily, member 13
CRNKL1	crooked neck pre-mRNA splicing factor 1	PLAA	phospholipase A2-activating protein				YEATS2	YEATS domain containing 2	TNFSF13B	tumor necrosis factor (ligand) superfamily, member 13b
CRP	C-reactive protein, pentraxin-related	PLAC8	placenta-specific 8				YIF1B	Yip1 interacting factor homolog B (S. cerevisiae)	TNFSF14	tumor necrosis factor (ligand) superfamily, member 14
CRTAP	cartilage associated protein	PLAGL1	pleiomorphic adenoma gene-like 1				YIPF1	Yip1 domain family, member 1	TNFSF15	tumor necrosis factor (ligand) superfamily, member 15
CRX	cone-rod homeobox	PLAGL2	pleiomorphic adenoma gene-like 2				YIPF5	Yip1 domain family, member 5	TNFSF4	tumor necrosis factor (ligand) superfamily, member 4
CRYBG3	beta-gamma crystallin domain containing 3	PLAU	plasminogen activator, urokinase				YME1L1	YME1-like 1 ATPase	TNFSF8	tumor necrosis factor (ligand) superfamily, member 8
CRYZ	crystallin, zeta (quinone reductase)	PLBD2	phospholipase B domain containing 2				YTHDC1	YTH domain containing 1	TNIK	TRAF2 and NCK interacting kinase
CSF3R	colony stimulating factor 3 receptor (granulocyte)	PLCB1	phospholipase C, beta 1 (phosphoinositide-specific)				YWHAB	tyrosine 3-monooxygenase/tryptophan 5-monooxygenase activation protein, beta polypeptide	TNNI1	troponin I type 1 (skeletal, slow)
CSGALNACT2	chondroitin sulfate N-acetylgalactosaminyltransferase 2	PLCD4	phospholipase C, delta 4				YWHAQ	tyrosine 3-monooxygenase/tryptophan 5-monooxygenase activation protein, theta polypeptide	TNPO1	transportin 1
CSNK2A1	casein kinase 2, alpha 1 polypeptide	PLCG2	phospholipase C, gamma 2 (phosphatidylinositol-specific)				ZACN	zinc activated ligand-gated ion channel	TNR	tenascin R
CSNK2B-LY6G5B-1181	Uncharacterized protein	PLCL1	phospholipase C-like 1				ZBED3	zinc finger, BED-type containing 3	TNRC18	trinucleotide repeat containing 18
CSRNP1	cysteine-serine-rich nuclear protein 1	PLCL2	phospholipase C-like 2				ZBED4	zinc finger, BED-type containing 4	TNRC6B	trinucleotide repeat containing 6B
CSRNP2	cysteine-serine-rich nuclear protein 2	PLCXD3	phosphatidylinositol-specific phospholipase C, X domain containing 3				ZBTB16	zinc finger and BTB domain containing 16	TNS4	tensin 4
CSRNP3	cysteine-serine-rich nuclear protein 3	PLD5	phospholipase D family, member 5				ZBTB20	zinc finger and BTB domain containing 20	TOMM40	translocase of outer mitochondrial membrane 40 homolog (yeast)
CTB-186H2.3	Uncharacterized protein	PLEK	pleckstrin				ZBTB24	zinc finger and BTB domain containing 24	TOP2A	topoisomerase (DNA) II alpha 170kDa
CTBS	chitobiase, di-N-acetyl-	PLEKHA1	pleckstrin homology domain containing, family A (phosphoinositide binding specific) member 1				ZBTB25	zinc finger and BTB domain containing 25	TOPBP1	topoisomerase (DNA) II binding protein 1
CTC-349C3.1	Homo sapiens uncharacterized LOC100996485 (LOC100996485), mRNA.	PLEKHA3	pleckstrin homology domain containing, family A (phosphoinositide binding specific) member 3				ZBTB26	zinc finger and BTB domain containing 26	TOR1A	torsin family 1, member A (torsin A)
CTC-432M15.3	Folliculin-interacting protein 1	PLEKHA8	pleckstrin homology domain containing, family A (phosphoinositide binding specific) member 8				ZBTB3	zinc finger and BTB domain containing 3	TOR1AIP1	torsin A interacting protein 1
CTD-2228K2.5	Uncharacterized protein	PLEKHG1	pleckstrin homology domain containing, family G (with RhoGef domain) member 1				ZBTB33	zinc finger and BTB domain containing 33	TOX3	TOX high mobility group box family member 3
CTD-2368P22.1	HCG1811579; Uncharacterized protein	PLEKHO1	pleckstrin homology domain containing, family O member 1				ZBTB34	zinc finger and BTB domain containing 34	TP53BP2	tumor protein p53 binding protein, 2
CTD-2545M3.6		PLEKHO2	pleckstrin homology domain containing, family O member 2				ZBTB37	zinc finger and BTB domain containing 37	TP53RK	TP53 regulating kinase
CTDNEP1	CTD nuclear envelope phosphatase 1	PLEKHS1	pleckstrin homology domain containing, family S member 1				ZBTB40	zinc finger and BTB domain containing 40	TP53TG3	TP53 target 3
CTDSP1	CTD (carboxy-terminal domain, RNA polymerase II, polypeptide A) small phosphatase 1	PLK3	polo-like kinase 3				ZBTB42	zinc finger and BTB domain containing 42	TP53TG3B	TP53 target 3B
CTDSP2	CTD (carboxy-terminal domain, RNA polymerase II, polypeptide A) small phosphatase 2	PLN	phospholamban				ZBTB44	zinc finger and BTB domain containing 44	TP53TG3C	TP53 target 3C
CTH	cystathionase (cystathionine gamma-lyase)	PLOD1	procollagen-lysine, 2-oxoglutarate 5-dioxygenase 1				ZBTB46	zinc finger and BTB domain containing 46	TP53TG3D	TP53 target 3D
CTNNA2	catenin (cadherin-associated protein), alpha 2	PLOD2	procollagen-lysine, 2-oxoglutarate 5-dioxygenase 2				ZBTB6	zinc finger and BTB domain containing 6	TP53TG5	TP53 target 5
CTNNA3	catenin (cadherin-associated protein), alpha 3	PLS3	plastin 3				ZBTB7C	zinc finger and BTB domain containing 7C	TP73	tumor protein p73
CTNND1	catenin (cadherin-associated protein), delta 1	PLSCR1	phospholipid scramblase 1				ZBTB8B	zinc finger and BTB domain containing 8B	TPBG	trophoblast glycoprotein
CTNS	cystinosin, lysosomal cystine transporter	PLXDC1	plexin domain containing 1				ZC3H10	zinc finger CCCH-type containing 10	TPCN2	two pore segment channel 2
CTSB	cathepsin B	PLXDC2	plexin domain containing 2				ZC3H11A	zinc finger CCCH-type containing 11A	TPD52	tumor protein D52
CTSD	cathepsin D	PLXNA2	plexin A2				ZC3H12C	zinc finger CCCH-type containing 12C	TPD52L1	tumor protein D52-like 1
CTSE	cathepsin E	PLXNA4	plexin A4				ZC3H12D	zinc finger CCCH-type containing 12D	TPD52L3	tumor protein D52-like 3
CTSO	cathepsin O	PLXND1	plexin D1				ZC3H13	zinc finger CCCH-type containing 13	TPGS1	tubulin polyglutamylase complex subunit 1
CTTNBP2NL	CTTNBP2 N-terminal like	PMFBP1	polyamine modulated factor 1 binding protein 1				ZC3H7B	zinc finger CCCH-type containing 7B	TPGS2	tubulin polyglutamylase complex subunit 2
CTU1	cytosolic thiouridylase subunit 1	PML	promyelocytic leukemia				ZC3H8	zinc finger CCCH-type containing 8	TPK1	thiamin pyrophosphokinase 1
CUL4B	cullin 4B	PMPCA	peptidase (mitochondrial processing) alpha				ZC3HAV1	zinc finger CCCH-type, antiviral 1	TPM2	tropomyosin 2 (beta)
CUX1	cut-like homeobox 1	PNMA2	paraneoplastic Ma antigen 2				ZC4H2	zinc finger, C4H2 domain containing	TRA2B	transformer 2 beta homolog (Drosophila)
CWC15	CWC15 spliceosome-associated protein homolog (S. cerevisiae)	PNPLA3	patatin-like phospholipase domain containing 3				ZCCHC14	zinc finger, CCHC domain containing 14	TRABD2A	TraB domain containing 2A
CWC25	CWC25 spliceosome-associated protein homolog (S. cerevisiae)	PNPLA8	patatin-like phospholipase domain containing 8				ZCCHC16	zinc finger, CCHC domain containing 16	TRABD2B	TraB domain containing 2B
CX3CL1	chemokine (C-X3-C motif) ligand 1	PNPO	pyridoxamine 5'-phosphate oxidase				ZCCHC24	zinc finger, CCHC domain containing 24	TRAF3	TNF receptor-associated factor 3
CX3CR1	chemokine (C-X3-C motif) receptor 1	PNRC2	proline-rich nuclear receptor coactivator 2				ZDHHC11	zinc finger, DHHC-type containing 11	TRAF6	TNF receptor-associated factor 6, E3 ubiquitin protein ligase
CXCL9	chemokine (C-X-C motif) ligand 9	POC1A	POC1 centriolar protein A				ZDHHC11B	zinc finger, DHHC-type containing 11B	TRAM2	translocation associated membrane protein 2
CXCR6	chemokine (C-X-C motif) receptor 6	POGK	pogo transposable element with KRAB domain				ZDHHC15	zinc finger, DHHC-type containing 15	TRANK1	tetratricopeptide repeat and ankyrin repeat containing 1
CXorf40A	chromosome X open reading frame 40A	POLD3	polymerase (DNA-directed), delta 3, accessory subunit				ZDHHC18	zinc finger, DHHC-type containing 18	TRAPPC10	trafficking protein particle complex 10
CXorf56	chromosome X open reading frame 56	POLE	polymerase (DNA directed), epsilon, catalytic subunit				ZDHHC2	zinc finger, DHHC-type containing 2	TRAPPC13	trafficking protein particle complex 13
CXorf61	chromosome X open reading frame 61	POLI	polymerase (DNA directed) iota				ZDHHC22	zinc finger, DHHC-type containing 22	TRAPPC6B	trafficking protein particle complex 6B
CXXC5	CXXC finger protein 5	POLK	polymerase (DNA directed) kappa				ZDHHC3	zinc finger, DHHC-type containing 3	TRAT1	T cell receptor associated transmembrane adaptor 1
CYB561A3	cytochrome b561 family, member A3	POLR1A	polymerase (RNA) I polypeptide A, 194kDa				ZDHHC7	zinc finger, DHHC-type containing 7	TRERF1	transcriptional regulating factor 1
CYB561D1	cytochrome b561 family, member D1	POLR1B	polymerase (RNA) I polypeptide B, 128kDa				ZDHHC9	zinc finger, DHHC-type containing 9	TRHDE	thyrotropin-releasing hormone degrading enzyme
CYB5D1	cytochrome b5 domain containing 1	POLR2D	polymerase (RNA) II (DNA directed) polypeptide D				ZEB2	zinc finger E-box binding homeobox 2	TRIM2	tripartite motif containing 2
CYB5R4	cytochrome b5 reductase 4	POLR2E	polymerase (RNA) II (DNA directed) polypeptide E, 25kDa				ZFP28	ZFP28 zinc finger protein	TRIM24	tripartite motif containing 24
CYBB	cytochrome b-245, beta polypeptide	POLR3F	polymerase (RNA) III (DNA directed) polypeptide F, 39 kDa				ZFP3	ZFP3 zinc finger protein	TRIM25	tripartite motif containing 25
CYBRD1	cytochrome b reductase 1	POLR3G	polymerase (RNA) III (DNA directed) polypeptide G (32kD)				ZFP30	ZFP30 zinc finger protein	TRIM29	tripartite motif containing 29
CYCS	cytochrome c, somatic	POLR3K	polymerase (RNA) III (DNA directed) polypeptide K, 12.3 kDa				ZFP37	ZFP37 zinc finger protein	TRIM31	tripartite motif containing 31
CYFIP2	cytoplasmic FMR1 interacting protein 2	POM121C	POM121 transmembrane nucleoporin C				ZFP69B	ZFP69 zinc finger protein B	TRIM38	tripartite motif containing 38
CYHR1	cysteine/histidine-rich 1	POMT2	protein-O-mannosyltransferase 2				ZFP82	ZFP82 zinc finger protein	TRIM40	tripartite motif containing 40
CYP11B1	cytochrome P450, family 11, subfamily B, polypeptide 1	POPDC2	popeye domain containing 2				ZFR2	zinc finger RNA binding protein 2	TRIM44	tripartite motif containing 44
CYP26B1	cytochrome P450, family 26, subfamily B, polypeptide 1	POT1	protection of telomeres 1				ZFX	zinc finger protein, X-linked	TRIM45	tripartite motif containing 45
CYP27B1	cytochrome P450, family 27, subfamily B, polypeptide 1	POTED	POTE ankyrin domain family, member D				ZFYVE26	zinc finger, FYVE domain containing 26	TRIM46	tripartite motif containing 46
CYP27C1	cytochrome P450, family 27, subfamily C, polypeptide 1	POU2F1	POU class 2 homeobox 1				ZFYVE28	zinc finger, FYVE domain containing 28	TRIM65	tripartite motif containing 65
CYP2C19	cytochrome P450, family 2, subfamily C, polypeptide 19	POU2F2	POU class 2 homeobox 2				ZFYVE9	zinc finger, FYVE domain containing 9	TRIM66	tripartite motif containing 66
CYP2C8	cytochrome P450, family 2, subfamily C, polypeptide 8	POU2F3	POU class 2 homeobox 3				ZG16	zymogen granule protein 16	TRIM67	tripartite motif containing 67
CYP3A5	cytochrome P450, family 3, subfamily A, polypeptide 5	POU3F2	POU class 3 homeobox 2				ZGLP1	zinc finger, GATA-like protein 1	TRIM73	tripartite motif containing 73
CYP3A7	cytochrome P450, family 3, subfamily A, polypeptide 7	POU3F3	POU class 3 homeobox 3				ZHX3	zinc fingers and homeoboxes 3	TRIM9	tripartite motif containing 9
CYP4A11	cytochrome P450, family 4, subfamily A, polypeptide 11	POU4F1	POU class 4 homeobox 1				ZIC2	Zic family member 2	TRIP12	thyroid hormone receptor interactor 12
CYP4A22	cytochrome P450, family 4, subfamily A, polypeptide 22	POU4F2	POU class 4 homeobox 2				ZIC5	Zic family member 5	TRIP6	thyroid hormone receptor interactor 6
CYP4F11	cytochrome P450, family 4, subfamily F, polypeptide 11	POU5F1B	POU class 5 homeobox 1B				ZKSCAN1	zinc finger with KRAB and SCAN domains 1	TRIT1	tRNA isopentenyltransferase 1
CYP4F12	cytochrome P450, family 4, subfamily F, polypeptide 12	POU6F1	POU class 6 homeobox 1				ZKSCAN7	zinc finger with KRAB and SCAN domains 7	TRMT10A	tRNA methyltransferase 10 homolog A (S. cerevisiae)
CYP4F3	cytochrome P450, family 4, subfamily F, polypeptide 3	PP13439					ZKSCAN8	zinc finger with KRAB and SCAN domains 8	TRMT10C	tRNA methyltransferase 10 homolog C (S. cerevisiae)
CYP4V2	cytochrome P450, family 4, subfamily V, polypeptide 2	PPAP2B	phosphatidic acid phosphatase type 2B				ZMAT1	zinc finger, matrin-type 1	TRMT1L	tRNA methyltransferase 1 homolog (S. cerevisiae)-like
CYP7B1	cytochrome P450, family 7, subfamily B, polypeptide 1	PPAPDC1A	phosphatidic acid phosphatase type 2 domain containing 1A				ZMAT3	zinc finger, matrin-type 3	TRNAU1AP	tRNA selenocysteine 1 associated protein 1
CYP8B1	cytochrome P450, family 8, subfamily B, polypeptide 1	PPAPDC2	phosphatidic acid phosphatase type 2 domain containing 2				ZMAT4	zinc finger, matrin-type 4	TROVE2	TROVE domain family, member 2
CYR61	cysteine-rich, angiogenic inducer, 61	PPARA	peroxisome proliferator-activated receptor alpha				ZMIZ1	zinc finger, MIZ-type containing 1	TRPM3	transient receptor potential cation channel, subfamily M, member 3
CYSLTR2	cysteinyl leukotriene receptor 2	PPARD	peroxisome proliferator-activated receptor delta				ZMIZ2	zinc finger, MIZ-type containing 2	TRPM7	transient receptor potential cation channel, subfamily M, member 7
DAAM2	dishevelled associated activator of morphogenesis 2	PPARGC1B	peroxisome proliferator-activated receptor gamma, coactivator 1 beta				ZMYM4	zinc finger, MYM-type 4	TRPM8	transient receptor potential cation channel, subfamily M, member 8
DAB2IP	DAB2 interacting protein	PPIE	peptidylprolyl isomerase E (cyclophilin E)				ZMYND19	zinc finger, MYND-type containing 19	TSC22D2	TSC22 domain family, member 2
DAP	death-associated protein	PPIL1	peptidylprolyl isomerase (cyclophilin)-like 1				ZNF10	zinc finger protein 10	TSC22D3	TSC22 domain family, member 3
DAPP1	dual adaptor of phosphotyrosine and 3-phosphoinositides	PPIL4	peptidylprolyl isomerase (cyclophilin)-like 4				ZNF101	zinc finger protein 101	TSEN2	TSEN2 tRNA splicing endonuclease subunit
DAZ1	deleted in azoospermia 1	PPIL6	peptidylprolyl isomerase (cyclophilin)-like 6				ZNF106	zinc finger protein 106	TSHR	thyroid stimulating hormone receptor
DAZ2	deleted in azoospermia 2	PPL	periplakin				ZNF132	zinc finger protein 132	TSHZ2	teashirt zinc finger homeobox 2
DAZ3	deleted in azoospermia 3	PPM1A	protein phosphatase, Mg2+/Mn2+ dependent, 1A				ZNF134	zinc finger protein 134	TSHZ3	teashirt zinc finger homeobox 3
DAZ4	deleted in azoospermia 4	PPM1D	protein phosphatase, Mg2+/Mn2+ dependent, 1D				ZNF140	zinc finger protein 140	TSKU	tsukushi, small leucine rich proteoglycan
DAZAP2	DAZ associated protein 2	PPM1K	protein phosphatase, Mg2+/Mn2+ dependent, 1K				ZNF146	zinc finger protein 146	TSNARE1	t-SNARE domain containing 1
DAZL	deleted in azoospermia-like	PPM1L	protein phosphatase, Mg2+/Mn2+ dependent, 1L				ZNF148	zinc finger protein 148	TSPAN11	tetraspanin 11
DBR1	debranching RNA lariats 1	PPM1M	protein phosphatase, Mg2+/Mn2+ dependent, 1M				ZNF155	zinc finger protein 155	TSPAN12	tetraspanin 12
DBT	dihydrolipoamide branched chain transacylase E2	PPP1R12B	protein phosphatase 1, regulatory subunit 12B				ZNF16	zinc finger protein 16	TSPAN14	tetraspanin 14
DBX2	developing brain homeobox 2	PPP1R15A	protein phosphatase 1, regulatory subunit 15A				ZNF175	zinc finger protein 175	TSPAN16	tetraspanin 16
DCAF10	DDB1 and CUL4 associated factor 10	PPP1R36	protein phosphatase 1, regulatory subunit 36				ZNF195	zinc finger protein 195	TSPAN2	tetraspanin 2
DCAF12L1	DDB1 and CUL4 associated factor 12-like 1	PPP1R37	protein phosphatase 1, regulatory subunit 37				ZNF2	zinc finger protein 2	TSPAN31	tetraspanin 31
DCAF5	DDB1 and CUL4 associated factor 5	PPP1R3A	protein phosphatase 1, regulatory subunit 3A				ZNF208	zinc finger protein 208	TSPAN4	tetraspanin 4
DCAF7	DDB1 and CUL4 associated factor 7	PPP1R3B	protein phosphatase 1, regulatory subunit 3B				ZNF223	zinc finger protein 223	TSPEAR	thrombospondin-type laminin G domain and EAR repeats
DCBLD2	discoidin, CUB and LCCL domain containing 2	PPP1R3D	protein phosphatase 1, regulatory subunit 3D				ZNF225	zinc finger protein 225	TSPYL1	TSPY-like 1
DCDC2	doublecortin domain containing 2	PPP1R3E	protein phosphatase 1, regulatory subunit 3E				ZNF226	zinc finger protein 226	TSPYL4	TSPY-like 4
DCHS2	dachsous cadherin-related 2	PPP1R7	protein phosphatase 1, regulatory subunit 7				ZNF233	zinc finger protein 233	TSPYL5	TSPY-like 5
DCLK1	doublecortin-like kinase 1	PPP2R2D	protein phosphatase 2, regulatory subunit B, delta				ZNF24	zinc finger protein 24	TSPYL6	TSPY-like 6
DCLRE1B	DNA cross-link repair 1B	PPP2R3A	protein phosphatase 2, regulatory subunit B'', alpha				ZNF248	zinc finger protein 248	TSR2	TSR2, 20S rRNA accumulation, homolog (S. cerevisiae)
DCLRE1C	DNA cross-link repair 1C	PPP2R5A	protein phosphatase 2, regulatory subunit B', alpha				ZNF25	zinc finger protein 25	TSSK3	testis-specific serine kinase 3
DCP2	decapping mRNA 2	PPP3R1	protein phosphatase 3, regulatory subunit B, alpha				ZNF250	zinc finger protein 250	TTC13	tetratricopeptide repeat domain 13
DCPS	decapping enzyme, scavenger	PPP3R2	protein phosphatase 3, regulatory subunit B, beta				ZNF251	zinc finger protein 251	TTC17	tetratricopeptide repeat domain 17
DCT	dopachrome tautomerase	PPP4R1L	protein phosphatase 4, regulatory subunit 1-like				ZNF256	zinc finger protein 256	TTC3	tetratricopeptide repeat domain 3
DCTD	dCMP deaminase	PPTC7	PTC7 protein phosphatase homolog (S. cerevisiae)				ZNF260	zinc finger protein 260	TTC33	tetratricopeptide repeat domain 33
DCTN3	dynactin 3 (p22)	PRDM15	PR domain containing 15				ZNF264	zinc finger protein 264	TTC37	tetratricopeptide repeat domain 37
DCTN6	dynactin 6	PRDM16	PR domain containing 16				ZNF280C	zinc finger protein 280C	TTC39A	tetratricopeptide repeat domain 39A
DCUN1D3	DCN1, defective in cullin neddylation 1, domain containing 3	PRDM5	PR domain containing 5				ZNF280D	zinc finger protein 280D	TTC39B	tetratricopeptide repeat domain 39B
DCX	doublecortin	PRDM6	PR domain containing 6				ZNF281	zinc finger protein 281	TTC39C	tetratricopeptide repeat domain 39C
DDAH1	dimethylarginine dimethylaminohydrolase 1	PRELP	proline/arginine-rich end leucine-rich repeat protein				ZNF284	zinc finger protein 284	TTC7A	tetratricopeptide repeat domain 7A
DDC	dopa decarboxylase (aromatic L-amino acid decarboxylase)	PREPL	prolyl endopeptidase-like				ZNF286A	Zinc finger protein 286A	TTF2	transcription termination factor, RNA polymerase II
DDI1	DNA-damage inducible 1 homolog 1 (S. cerevisiae)	PRG2	proteoglycan 2, bone marrow (natural killer cell activator, eosinophil granule major basic protein)				ZNF286B	zinc finger protein 286B	TTL	tubulin tyrosine ligase
DDI2	DNA-damage inducible 1 homolog 2 (S. cerevisiae)	PRICKLE1	prickle homolog 1 (Drosophila)				ZNF296	zinc finger protein 296	TTLL11	tubulin tyrosine ligase-like family, member 11
DDR2	discoidin domain receptor tyrosine kinase 2	PRICKLE2	prickle homolog 2 (Drosophila)				ZNF320	zinc finger protein 320	TTLL12	tubulin tyrosine ligase-like family, member 12
DDRGK1	DDRGK domain containing 1	PRKAB2	protein kinase, AMP-activated, beta 2 non-catalytic subunit				ZNF321P	zinc finger protein 321, pseudogene	TTLL4	tubulin tyrosine ligase-like family, member 4
DDTL	D-dopachrome tautomerase-like	PRKAR1A	protein kinase, cAMP-dependent, regulatory, type I, alpha				ZNF329	zinc finger protein 329	TTLL6	tubulin tyrosine ligase-like family, member 6
DDX10	DEAD (Asp-Glu-Ala-Asp) box polypeptide 10	PRKAR2A	protein kinase, cAMP-dependent, regulatory, type II, alpha				ZNF335	zinc finger protein 335	TTLL7	tubulin tyrosine ligase-like family, member 7
DDX11	DEAD/H (Asp-Glu-Ala-Asp/His) box helicase 11	PRKCA	protein kinase C, alpha				ZNF337	zinc finger protein 337	TTR	transthyretin
DDX19A	DEAD (Asp-Glu-Ala-Asp) box polypeptide 19A	PRKCB	protein kinase C, beta				ZNF33A	zinc finger protein 33A	TTYH2	tweety family member 2
DDX23	DEAD (Asp-Glu-Ala-Asp) box polypeptide 23	PRKG1	protein kinase, cGMP-dependent, type I				ZNF33B	zinc finger protein 33B	TUB	tubby bipartite transcription factor
DDX41	DEAD (Asp-Glu-Ala-Asp) box polypeptide 41	PRKX	protein kinase, X-linked				ZNF346	zinc finger protein 346	TUBB	tubulin, beta class I
DDX52	DEAD (Asp-Glu-Ala-Asp) box polypeptide 52	PRLR	prolactin receptor				ZNF35	zinc finger protein 35	TUBD1	tubulin, delta 1
DDX55	DEAD (Asp-Glu-Ala-Asp) box polypeptide 55	PRMT10	protein arginine methyltransferase 10 (putative)				ZNF350	zinc finger protein 350	TUBG2	tubulin, gamma 2
DDX6	DEAD (Asp-Glu-Ala-Asp) box helicase 6	PROM2	prominin 2				ZNF365	zinc finger protein 365	TUBGCP4	tubulin, gamma complex associated protein 4
DDX60L	DEAD (Asp-Glu-Ala-Asp) box polypeptide 60-like	PROX1	prospero homeobox 1				ZNF366	zinc finger protein 366	TULP3	tubby like protein 3
DEDD2	death effector domain containing 2	PRPF38A	pre-mRNA processing factor 38A				ZNF37A	zinc finger protein 37A	TULP4	tubby like protein 4
DEFA5	defensin, alpha 5, Paneth cell-specific	PRPF4B	pre-mRNA processing factor 4B				ZNF384	zinc finger protein 384	TUSC2	tumor suppressor candidate 2
DEGS1	delta(4)-desaturase, sphingolipid 1	PRPF6	pre-mRNA processing factor 6				ZNF385D	zinc finger protein 385D	TVP23C-CDRT4	TVP23C-CDRT4 readthrough
DENND2C	DENN/MADD domain containing 2C	PRR11	proline rich 11				ZNF394	zinc finger protein 394	TWF1	twinfilin actin-binding protein 1
DENND5B	DENN/MADD domain containing 5B	PRR14L	proline rich 14-like				ZNF397	zinc finger protein 397	TWIST1	twist basic helix-loop-helix transcription factor 1
DENND6A	DENN/MADD domain containing 6A	PRR18	proline rich 18				ZNF404	zinc finger protein 404	TXLNG	taxilin gamma
DENR	density-regulated protein	PRR23A	proline rich 23A				ZNF417	zinc finger protein 417	TXNDC17	thioredoxin domain containing 17
DEPTOR	DEP domain containing MTOR-interacting protein	PRR23B	proline rich 23B				ZNF436	zinc finger protein 436	TXNDC2	thioredoxin domain containing 2 (spermatozoa)
DESI1	desumoylating isopeptidase 1	PRR23C	proline rich 23C				ZNF439	zinc finger protein 439	TXNL1	thioredoxin-like 1
DGCR14	DiGeorge syndrome critical region gene 14	PRR26	proline rich 26				ZNF440	zinc finger protein 440	TXNL4B	thioredoxin-like 4B
DGKE	diacylglycerol kinase, epsilon 64kDa	PRR3	proline rich 3				ZNF441	zinc finger protein 441	TXNRD1	thioredoxin reductase 1
DGKH	diacylglycerol kinase, eta	PRRC2B	proline-rich coiled-coil 2B				ZNF442	zinc finger protein 442	TYK2	tyrosine kinase 2
DHCR24	24-dehydrocholesterol reductase	PRRT2	proline-rich transmembrane protein 2				ZNF445	zinc finger protein 445	TYRP1	tyrosinase-related protein 1
DHFR	dihydrofolate reductase	PRSS12	protease, serine, 12 (neurotrypsin, motopsin)				ZNF446	zinc finger protein 446	TYSND1	trypsin domain containing 1
DHFRL1	dihydrofolate reductase-like 1	PRSS16	protease, serine, 16 (thymus)				ZNF449	zinc finger protein 449	TYW1	tRNA-yW synthesizing protein 1 homolog (S. cerevisiae)
DHTKD1	dehydrogenase E1 and transketolase domain containing 1	PRSS37	protease, serine, 37				ZNF45	zinc finger protein 45	TYW3	tRNA-yW synthesizing protein 3 homolog (S. cerevisiae)
DHX32	DEAH (Asp-Glu-Ala-His) box polypeptide 32	PSAPL1	prosaposin-like 1 (gene/pseudogene)				ZNF468	zinc finger protein 468	TYW5	tRNA-yW synthesizing protein 5
DHX33	DEAH (Asp-Glu-Ala-His) box polypeptide 33	PSD2	pleckstrin and Sec7 domain containing 2				ZNF470	zinc finger protein 470	UBA2	ubiquitin-like modifier activating enzyme 2
DHX40	DEAH (Asp-Glu-Ala-His) box polypeptide 40	PSD3	pleckstrin and Sec7 domain containing 3				ZNF473	zinc finger protein 473	UBA5	ubiquitin-like modifier activating enzyme 5
DIAPH2	diaphanous-related formin 2	PSD4	pleckstrin and Sec7 domain containing 4				ZNF483	zinc finger protein 483	UBAP2	ubiquitin associated protein 2
DICER1	dicer 1, ribonuclease type III	PSEN1	presenilin 1				ZNF488	zinc finger protein 488	UBASH3B	ubiquitin associated and SH3 domain containing B
DIEXF	digestive organ expansion factor homolog (zebrafish)	PSMA5	proteasome (prosome, macropain) subunit, alpha type, 5				ZNF490	zinc finger protein 490	UBC	ubiquitin C
DIP2C	DIP2 disco-interacting protein 2 homolog C (Drosophila)	PSMB2	proteasome (prosome, macropain) subunit, beta type, 2				ZNF491	zinc finger protein 491	UBE2B	ubiquitin-conjugating enzyme E2B
DIRAS2	DIRAS family, GTP-binding RAS-like 2	PSMB9	proteasome (prosome, macropain) subunit, beta type, 9				ZNF496	zinc finger protein 496	UBE2D3	ubiquitin-conjugating enzyme E2D 3
DIS3	DIS3 mitotic control homolog (S. cerevisiae)	PSMC2	proteasome (prosome, macropain) 26S subunit, ATPase, 2				ZNF516	zinc finger protein 516	UBE2G1	ubiquitin-conjugating enzyme E2G 1
DISC1	disrupted in schizophrenia 1	PSMC5	proteasome (prosome, macropain) 26S subunit, ATPase, 5				ZNF527	zinc finger protein 527	UBE2N	ubiquitin-conjugating enzyme E2N
DISP2	dispatched homolog 2 (Drosophila)	PSMD1	proteasome (prosome, macropain) 26S subunit, non-ATPase, 1				ZNF528	zinc finger protein 528	UBE2Q1	ubiquitin-conjugating enzyme E2Q family member 1
DIXDC1	DIX domain containing 1	PSMD11	proteasome (prosome, macropain) 26S subunit, non-ATPase, 11				ZNF530	zinc finger protein 530	UBE2QL1	ubiquitin-conjugating enzyme E2Q family-like 1
DKK3	dickkopf WNT signaling pathway inhibitor 3	PSMD13	proteasome (prosome, macropain) 26S subunit, non-ATPase, 13				ZNF541	zinc finger protein 541	UBE2R2	ubiquitin-conjugating enzyme E2R 2
DLC1	deleted in liver cancer 1	PSORS1C2	psoriasis susceptibility 1 candidate 2				ZNF546	zinc finger protein 546	UBE2W	ubiquitin-conjugating enzyme E2W (putative)
DLEU1	deleted in lymphocytic leukemia 1 (non-protein coding)	PSPC1	paraspeckle component 1				ZNF548	zinc finger protein 548	UBE3B	ubiquitin protein ligase E3B
DLG2	discs, large homolog 2 (Drosophila)	PTAFR	platelet-activating factor receptor				ZNF550	zinc finger protein 550	UBE3C	ubiquitin protein ligase E3C
DLGAP2	discs, large (Drosophila) homolog-associated protein 2	PTAR1	protein prenyltransferase alpha subunit repeat containing 1				ZNF551	zinc finger protein 551	UBFD1	ubiquitin family domain containing 1
DLL4	delta-like 4 (Drosophila)	PTCD1	pentatricopeptide repeat domain 1				ZNF555	zinc finger protein 555	UBL3	ubiquitin-like 3
DLX1	distal-less homeobox 1	PTCD2	pentatricopeptide repeat domain 2				ZNF556	zinc finger protein 556	UBN2	ubinuclein 2
DLX3	distal-less homeobox 3	PTCD3	pentatricopeptide repeat domain 3				ZNF561	zinc finger protein 561	UBR2	ubiquitin protein ligase E3 component n-recognin 2
DMC1	DNA meiotic recombinase 1	PTCH1	patched 1				ZNF562	zinc finger protein 562	UBXN11	UBX domain protein 11
DMGDH	dimethylglycine dehydrogenase	PTCHD1	patched domain containing 1				ZNF564	zinc finger protein 564	UBXN2A	UBX domain protein 2A
DMKN	dermokine	PTDSS2	phosphatidylserine synthase 2				ZNF567	zinc finger protein 567	UBXN4	UBX domain protein 4
DMXL1	Dmx-like 1	PTEN	phosphatase and tensin homolog				ZNF57	zinc finger protein 57	ZNF736	zinc finger protein 736
DNAAF3	dynein, axonemal, assembly factor 3	PTER	phosphotriesterase related				ZNF570	zinc finger protein 570	ZNF738	zinc finger protein 738
DNAH10OS	dynein, axonemal, heavy chain 10 opposite strand	PTGDR	prostaglandin D2 receptor (DP)				ZNF572	zinc finger protein 572	ZNF74	zinc finger protein 74
DNAH17	dynein, axonemal, heavy chain 17	PTGER2	prostaglandin E receptor 2 (subtype EP2), 53kDa				ZNF574	zinc finger protein 574	ZNF747	zinc finger protein 747
DNAH9	dynein, axonemal, heavy chain 9	PTGFR	prostaglandin F receptor (FP)				ZNF583	zinc finger protein 583	ZNF749	zinc finger protein 749
DNAJA1	DnaJ (Hsp40) homolog, subfamily A, member 1	PTGR2	prostaglandin reductase 2				ZNF584	zinc finger protein 584	ZNF75A	zinc finger protein 75a
DNAJB13	DnaJ (Hsp40) homolog, subfamily B, member 13	PTGS1	prostaglandin-endoperoxide synthase 1 (prostaglandin G/H synthase and cyclooxygenase)				ZNF585A	zinc finger protein 585A	ZNF764	zinc finger protein 764
DNAJC10	DnaJ (Hsp40) homolog, subfamily C, member 10	PTK2	protein tyrosine kinase 2				ZNF586	zinc finger protein 586	ZNF770	zinc finger protein 770
DNAJC11	DnaJ (Hsp40) homolog, subfamily C, member 11	PTPLAD2	protein tyrosine phosphatase-like A domain containing 2				ZNF587	zinc finger protein 587	ZNF771	zinc finger protein 771
DNAJC15	DnaJ (Hsp40) homolog, subfamily C, member 15	PTPN11	protein tyrosine phosphatase, non-receptor type 11				ZNF592	zinc finger protein 592	ZNF774	zinc finger protein 774
DNAJC16	DnaJ (Hsp40) homolog, subfamily C, member 16	PTPN14	protein tyrosine phosphatase, non-receptor type 14				ZNF597	zinc finger protein 597	ZNF778	zinc finger protein 778
DNAJC22	DnaJ (Hsp40) homolog, subfamily C, member 22	PTPN18	protein tyrosine phosphatase, non-receptor type 18 (brain-derived)				ZNF613	zinc finger protein 613	ZNF780B	zinc finger protein 780B
DNAJC6	DnaJ (Hsp40) homolog, subfamily C, member 6	PTPN4	protein tyrosine phosphatase, non-receptor type 4 (megakaryocyte)				ZNF616	zinc finger protein 616	ZNF788	zinc finger family member 788
DNAL1	dynein, axonemal, light chain 1	PTPN7	protein tyrosine phosphatase, non-receptor type 7				ZNF618	zinc finger protein 618	ZNF790	zinc finger protein 790
DNAL4	dynein, axonemal, light chain 4	PTPRA	protein tyrosine phosphatase, receptor type, A				ZNF621	zinc finger protein 621	ZNF792	zinc finger protein 792
DNASE1L1	deoxyribonuclease I-like 1	PTPRC	protein tyrosine phosphatase, receptor type, C				ZNF624	zinc finger protein 624	ZNF793	zinc finger protein 793
DNER	delta/notch-like EGF repeat containing	PTPRF	protein tyrosine phosphatase, receptor type, F				ZNF626	zinc finger protein 626	ZNF80	zinc finger protein 80
DNLZ	DNL-type zinc finger	PTPRG	protein tyrosine phosphatase, receptor type, G				ZNF629	zinc finger protein 629	ZNF804B	zinc finger protein 804B
DNM1	dynamin 1	PTPRJ	protein tyrosine phosphatase, receptor type, J				ZNF638	zinc finger protein 638	ZNF814	zinc finger protein 814
DNMT3A	DNA (cytosine-5-)-methyltransferase 3 alpha	PTPRN2	protein tyrosine phosphatase, receptor type, N polypeptide 2				ZNF639	zinc finger protein 639	ZNF831	zinc finger protein 831
DNMT3B	DNA (cytosine-5-)-methyltransferase 3 beta	PTPRT	protein tyrosine phosphatase, receptor type, T				ZNF641	zinc finger protein 641	ZNF841	zinc finger protein 841
DOCK1	dedicator of cytokinesis 1	PUM2	pumilio RNA-binding family member 2				ZNF646	zinc finger protein 646	ZNF853	zinc finger protein 853
DOCK5	dedicator of cytokinesis 5	PURB	purine-rich element binding protein B				ZNF649	zinc finger protein 649	ZNF862	zinc finger protein 862
DOK6	docking protein 6	PURG	purine-rich element binding protein G				ZNF652	zinc finger protein 652	ZNF880	zinc finger protein 880
DOPEY1	dopey family member 1	PUS7L	pseudouridylate synthase 7 homolog (S. cerevisiae)-like				ZNF665	zinc finger protein 665	ZNF90	zinc finger protein 90
DOPEY2	dopey family member 2	PVR	poliovirus receptor				ZNF667	zinc finger protein 667	ZNFX1	zinc finger, NFX1-type containing 1
DPCR1	diffuse panbronchiolitis critical region 1	PWWP2A	PWWP domain containing 2A				ZNF668	zinc finger protein 668	ZNRF2	zinc and ring finger 2
DPH2	DPH2 homolog (S. cerevisiae)	PYGO1	pygopus homolog 1 (Drosophila)				ZNF675	zinc finger protein 675	ZNRF3	zinc and ring finger 3
DPP10	dipeptidyl-peptidase 10 (non-functional)	QKI	QKI, KH domain containing, RNA binding				ZNF677	zinc finger protein 677	ZPLD1	zona pellucida-like domain containing 1
DPY19L3	dpy-19-like 3 (C. elegans)	QPRT	quinolinate phosphoribosyltransferase				ZNF678	zinc finger protein 678	ZRSR1	zinc finger (CCCH type), RNA-binding motif and serine/arginine rich 1
DPYSL3	dihydropyrimidinase-like 3	QSER1	glutamine and serine rich 1				ZNF687	zinc finger protein 687	ZSCAN10	zinc finger and SCAN domain containing 10
DRAXIN	dorsal inhibitory axon guidance protein	QSOX1	quiescin Q6 sulfhydryl oxidase 1				ZNF691	zinc finger protein 691	ZSCAN12	zinc finger and SCAN domain containing 12
DRG1	developmentally regulated GTP binding protein 1	RAB11FIP1	RAB11 family interacting protein 1 (class I)				ZNF695	zinc finger protein 695	ZSCAN2	zinc finger and SCAN domain containing 2
DRGX	dorsal root ganglia homeobox	RAB19	RAB19, member RAS oncogene family				ZNF697	zinc finger protein 697	ZSCAN20	zinc finger and SCAN domain containing 20
DSC1	desmocollin 1	RAB22A	RAB22A, member RAS oncogene family				ZNF70	zinc finger protein 70	ZSCAN22	zinc finger and SCAN domain containing 22
DSC2	desmocollin 2	RAB27B	RAB27B, member RAS oncogene family				ZNF701	zinc finger protein 701	ZSCAN30	zinc finger and SCAN domain containing 30
DSC3	desmocollin 3	RAB28	RAB28, member RAS oncogene family				ZNF704	zinc finger protein 704	ZSCAN5B	zinc finger and SCAN domain containing 5B
DSCAM	Down syndrome cell adhesion molecule	RAB2A	RAB2A, member RAS oncogene family				ZNF705A	zinc finger protein 705A	ZSCAN9	zinc finger and SCAN domain containing 9
DSE	dermatan sulfate epimerase	RAB30	RAB30, member RAS oncogene family				ZNF705B	zinc finger protein 705B	ZSWIM4	zinc finger, SWIM-type containing 4
DSG1	desmoglein 1	RAB36	RAB36, member RAS oncogene family				ZNF705D	zinc finger protein 705D	ZWINT	ZW10 interacting kinetochore protein
DSG4	desmoglein 4	RAB39A	RAB39A, member RAS oncogene family				ZNF705G	zinc finger protein 705G	ZYG11B	zyg-11 family member B, cell cycle regulator
DST	dystonin	RAB3D	RAB3D, member RAS oncogene family						ZZEF1	zinc finger, ZZ-type with EF-hand domain 1
DTD1	D-tyrosyl-tRNA deacylase 1	RAB3IL1	RAB3A interacting protein (rabin3)-like 1
DTNA	dystrobrevin, alpha	RAB42	RAB42, member RAS oncogene family
DTWD2	DTW domain containing 2	RAB44	RAB44, member RAS oncogene family
DTX1	deltex homolog 1 (Drosophila)	RAB5B	RAB5B, member RAS oncogene family
DTX3L	deltex 3-like (Drosophila)	RAB6B	RAB6B, member RAS oncogene family
DTX4	deltex homolog 4 (Drosophila)	RAB7L1	RAB7, member RAS oncogene family-like 1
DUSP16	dual specificity phosphatase 16	RAB8A	RAB8A, member RAS oncogene family
DUSP19	dual specificity phosphatase 19	RABAC1	Rab acceptor 1 (prenylated)
DUSP28	dual specificity phosphatase 28	RABEP1	rabaptin, RAB GTPase binding effector protein 1
DUSP3	dual specificity phosphatase 3	RABGAP1L	RAB GTPase activating protein 1-like
DUSP8	dual specificity phosphatase 8	RABIF	RAB interacting factor
DYNAP	dynactin associated protein	RABL3	RAB, member of RAS oncogene family-like 3
DYNLL2	dynein, light chain, LC8-type 2	RABL5	RAB, member RAS oncogene family-like 5
DYRK1A	dual-specificity tyrosine-(Y)-phosphorylation regulated kinase 1A	RAD1	RAD1 homolog (S. pombe)
DYRK4	dual-specificity tyrosine-(Y)-phosphorylation regulated kinase 4	RAD21L1	RAD21-like 1 (S. pombe)
E2F2	E2F transcription factor 2	RAD50	RAD50 homolog (S. cerevisiae)
EARS2	glutamyl-tRNA synthetase 2, mitochondrial	RAD54B	RAD54 homolog B (S. cerevisiae)
EBF4	early B-cell factor 4	RAD54L2	RAD54-like 2 (S. cerevisiae)
ECE1	endothelin converting enzyme 1	RAG1	recombination activating gene 1
ECHDC2	enoyl CoA hydratase domain containing 2	RAI14	retinoic acid induced 14
ECHDC3	enoyl CoA hydratase domain containing 3	RALA	v-ral simian leukemia viral oncogene homolog A (ras related)
ECHS1	enoyl CoA hydratase, short chain, 1, mitochondrial	RALGAPA1	Ral GTPase activating protein, alpha subunit 1 (catalytic)
ECM2	extracellular matrix protein 2, female organ and adipocyte specific	RALGAPA2	Ral GTPase activating protein, alpha subunit 2 (catalytic)
EDA	ectodysplasin A	RALY	RALY heterogeneous nuclear ribonucleoprotein
EDA2R	ectodysplasin A2 receptor	RAP1GAP2	RAP1 GTPase activating protein 2
EDIL3	EGF-like repeats and discoidin I-like domains 3	RAP1GDS1	RAP1, GTP-GDP dissociation stimulator 1
EED	embryonic ectoderm development	RAP2B	RAP2B, member of RAS oncogene family
EEF2K	eukaryotic elongation factor-2 kinase	RAPGEF3	Rap guanine nucleotide exchange factor (GEF) 3
EEPD1	endonuclease/exonuclease/phosphatase family domain containing 1	RAPGEF5	Rap guanine nucleotide exchange factor (GEF) 5
EFCAB10	EF-hand calcium binding domain 10	RAPGEF6	Rap guanine nucleotide exchange factor (GEF) 6
EFCAB14	EF-hand calcium binding domain 14	RAPH1	Ras association (RalGDS/AF-6) and pleckstrin homology domains 1
EFCAB6	EF-hand calcium binding domain 6	RASAL2	RAS protein activator like 2
EFHC1	EF-hand domain (C-terminal) containing 1	RASEF	RAS and EF-hand domain containing
EFHD1	EF-hand domain family, member D1	RASGRF1	Ras protein-specific guanine nucleotide-releasing factor 1
EFNA3	Ephrin-A3; Uncharacterized protein; cDNA FLJ57652, highly similar to Ephrin-A3	RASGRF2	Ras protein-specific guanine nucleotide-releasing factor 2
EGFR	epidermal growth factor receptor	RASGRP3	RAS guanyl releasing protein 3 (calcium and DAG-regulated)
EGR1	early growth response 1	RASGRP4	RAS guanyl releasing protein 4
EHD3	EH-domain containing 3	RASL10A	RAS-like, family 10, member A
EHD4	EH-domain containing 4	RASSF5	Ras association (RalGDS/AF-6) domain family member 5
EIF1	eukaryotic translation initiation factor 1	RASSF8	Ras association (RalGDS/AF-6) domain family (N-terminal) member 8
EIF1AX	eukaryotic translation initiation factor 1A, X-linked	RAVER1	ribonucleoprotein, PTB-binding 1
EIF2AK1	eukaryotic translation initiation factor 2-alpha kinase 1	RAX2	retina and anterior neural fold homeobox 2
EIF2B2	eukaryotic translation initiation factor 2B, subunit 2 beta, 39kDa	RBBP4	retinoblastoma binding protein 4
EIF3F	eukaryotic translation initiation factor 3, subunit F	RBBP5	retinoblastoma binding protein 5
EIF3I	eukaryotic translation initiation factor 3, subunit I	RBBP9	retinoblastoma binding protein 9
EIF4B	eukaryotic translation initiation factor 4B	RBFOX1	RNA binding protein, fox-1 homolog (C. elegans) 1
EIF4E	eukaryotic translation initiation factor 4E	RBFOX2	RNA binding protein, fox-1 homolog (C. elegans) 2
EIF4E3	eukaryotic translation initiation factor 4E family member 3	RBM12B	RNA binding motif protein 12B
EIF4EBP2	eukaryotic translation initiation factor 4E binding protein 2	RBM15B	RNA binding motif protein 15B
EIF5AL1	eukaryotic translation initiation factor 5A-like 1	RBM18	RNA binding motif protein 18
ELF4	E74-like factor 4 (ets domain transcription factor)	RBM22	RNA binding motif protein 22
ELK1	ELK1, member of ETS oncogene family	RBM23	RNA binding motif protein 23
ELK4	ELK4, ETS-domain protein (SRF accessory protein 1)	RBM25	RNA binding motif protein 25
ELL	elongation factor RNA polymerase II	RBM26	RNA binding motif protein 26
ELMOD2	ELMO/CED-12 domain containing 2	RBM27	RNA binding motif protein 27
ELN	elastin	RBM28	RNA binding motif protein 28
ELOVL2	ELOVL fatty acid elongase 2	RBM33	RNA binding motif protein 33
ELOVL6	ELOVL fatty acid elongase 6	RBM41	RNA binding motif protein 41
EMB	embigin	RBM46	RNA binding motif protein 46
EMC1	ER membrane protein complex subunit 1	RBM48	RNA binding motif protein 48
EMC10	ER membrane protein complex subunit 10	RBM4B	RNA binding motif protein 4B
EMC2	ER membrane protein complex subunit 2	RBM8A	RNA binding motif protein 8A
EMC7	ER membrane protein complex subunit 7	RBMS2	RNA binding motif, single stranded interacting protein 2
EMCN	endomucin	RBMX	RNA binding motif protein, X-linked
EMILIN2	elastin microfibril interfacer 2	RBMXL1	RNA binding motif protein, X-linked-like 1
EML6	echinoderm microtubule associated protein like 6	RBMXL3	RNA binding motif protein, X-linked-like 3
EMP1	epithelial membrane protein 1	RBP4	retinol binding protein 4, plasma
EMR2	egf-like module containing, mucin-like, hormone receptor-like 2	RBPJ	recombination signal binding protein for immunoglobulin kappa J region
EMX1	empty spiracles homeobox 1	RBPMS	RNA binding protein with multiple splicing
ENAH	enabled homolog (Drosophila)	RBPMS2	RNA binding protein with multiple splicing 2
ENAM	enamelin	RCBTB1	regulator of chromosome condensation (RCC1) and BTB (POZ) domain containing protein 1
ENC1	ectodermal-neural cortex 1 (with BTB domain)	RCL1	RNA terminal phosphate cyclase-like 1
ENPP1	ectonucleotide pyrophosphatase/phosphodiesterase 1	RCN2	reticulocalbin 2, EF-hand calcium binding domain
ENPP5	ectonucleotide pyrophosphatase/phosphodiesterase 5 (putative)	RCVRN	recoverin
ENTPD1	ectonucleoside triphosphate diphosphohydrolase 1	RD3	retinal degeneration 3
ENTPD3	ectonucleoside triphosphate diphosphohydrolase 3	RDH10	retinol dehydrogenase 10 (all-trans)
ENTPD7	ectonucleoside triphosphate diphosphohydrolase 7	RDH13	retinol dehydrogenase 13 (all-trans/9-cis)
ENY2	enhancer of yellow 2 homolog (Drosophila)	RDX	radixin
EP400	E1A binding protein p400	REG1A	regenerating islet-derived 1 alpha
EPB41L4B	erythrocyte membrane protein band 4.1 like 4B	REG1B	regenerating islet-derived 1 beta
EPHA10	EPH receptor A10	REG4	regenerating islet-derived family, member 4
EPHA4	EPH receptor A4	REL	v-rel avian reticuloendotheliosis viral oncogene homolog
EPHA6	EPH receptor A6	RELA	v-rel avian reticuloendotheliosis viral oncogene homolog A
EPHB1	EPH receptor B1	RELL1	RELT-like 1
EPHB2	EPH receptor B2	REPS2	RALBP1 associated Eps domain containing 2
EPHX2	epoxide hydrolase 2, cytoplasmic	REST	RE1-silencing transcription factor
EPM2A	epilepsy, progressive myoclonus type 2A, Lafora disease (laforin)	REV1	REV1, polymerase (DNA directed)
EPM2AIP1	EPM2A (laforin) interacting protein 1	REXO2	RNA exonuclease 2
EPPK1	epiplakin 1	RFC5	replication factor C (activator 1) 5, 36.5kDa
EPSTI1	epithelial stromal interaction 1 (breast)	RFNG	RFNG O-fucosylpeptide 3-beta-N-acetylglucosaminyltransferase
EPX	eosinophil peroxidase	RFTN2	raftlin family member 2
ERBB4	v-erb-b2 avian erythroblastic leukemia viral oncogene homolog 4	RFWD3	ring finger and WD repeat domain 3
ERC1	ELKS/RAB6-interacting/CAST family member 1	RFX2	regulatory factor X, 2 (influences HLA class II expression)
ERC2	ELKS/RAB6-interacting/CAST family member 2	RGL1	ral guanine nucleotide dissociation stimulator-like 1
ERCC4	excision repair cross-complementing rodent repair deficiency, complementation group 4	RGMB	RGM domain family, member B
ERCC6	excision repair cross-complementing rodent repair deficiency, complementation group 6	RGR	retinal G protein coupled receptor
ERCC6L	excision repair cross-complementing rodent repair deficiency, complementation group 6-like	RGS17	regulator of G-protein signaling 17
ERCC8	excision repair cross-complementing rodent repair deficiency, complementation group 8	RGS18	regulator of G-protein signaling 18
ERI2	ERI1 exoribonuclease family member 2	RGS5	regulator of G-protein signaling 5
ERLIN2	ER lipid raft associated 2	RGS7	regulator of G-protein signaling 7
ERMP1	endoplasmic reticulum metallopeptidase 1	RHD	Rh blood group, D antigen
ERN1	endoplasmic reticulum to nucleus signaling 1	RHOF	ras homolog family member F (in filopodia)
ERO1L	ERO1-like (S. cerevisiae)	RHOG	ras homolog family member G
ERP27	endoplasmic reticulum protein 27	RHOQ	ras homolog family member Q
ERP44	endoplasmic reticulum protein 44	RIC3	RIC3 acetylcholine receptor chaperone
ERVMER34-1	endogenous retrovirus group MER34, member 1	RIF1	RAP1 interacting factor homolog (yeast)
ERVV-1	endogenous retrovirus group V, member 1	RIMBP2	RIMS binding protein 2
ESPN	espin	RIMKLA	ribosomal modification protein rimK-like family member A
ESRP1	epithelial splicing regulatory protein 1	RIMKLB	ribosomal modification protein rimK-like family member B
ESRP2	epithelial splicing regulatory protein 2	RIMS2	regulating synaptic membrane exocytosis 2
ETNK2	ethanolamine kinase 2	RIMS3	regulating synaptic membrane exocytosis 3
EVA1A	eva-1 homolog A (C. elegans)	RIMS4	regulating synaptic membrane exocytosis 4
EVC	Ellis van Creveld syndrome	RIOK3	RIO kinase 3
EVPLL	envoplakin-like	RIPK4	receptor-interacting serine-threonine kinase 4
EXO5	exonuclease 5	RLN2	relaxin 2
EXOC8	exocyst complex component 8	RMDN1	regulator of microtubule dynamics 1
EXT1	exostosin glycosyltransferase 1	RNASE11	ribonuclease, RNase A family, 11 (non-active)
EYA1	eyes absent homolog 1 (Drosophila)	RNASEH2C	ribonuclease H2, subunit C
EYA2	eyes absent homolog 2 (Drosophila)	RND2	Rho family GTPase 2
EYA3	eyes absent homolog 3 (Drosophila)	RND3	Rho family GTPase 3
F13A1	coagulation factor XIII, A1 polypeptide	RNF103-CHMP3	RNF103-CHMP3 readthrough
F2RL2	coagulation factor II (thrombin) receptor-like 2	RNF11	ring finger protein 11
F2RL3	coagulation factor II (thrombin) receptor-like 3	RNF115	ring finger protein 115
F8	coagulation factor VIII, procoagulant component	RNF122	ring finger protein 122
F9	coagulation factor IX	RNF125	ring finger protein 125, E3 ubiquitin protein ligase
FABP2	fatty acid binding protein 2, intestinal	RNF126	ring finger protein 126
FABP5	fatty acid binding protein 5 (psoriasis-associated)	RNF144A	ring finger protein 144A
FADS2	fatty acid desaturase 2	RNF144B	ring finger protein 144B
FADS6	fatty acid desaturase 6	RNF152	ring finger protein 152
FAF1	Fas (TNFRSF6) associated factor 1	RNF165	ring finger protein 165
FAHD1	fumarylacetoacetate hydrolase domain containing 1	RNF168	ring finger protein 168, E3 ubiquitin protein ligase
FAHD2A	fumarylacetoacetate hydrolase domain containing 2A	RNF169	ring finger protein 169
FAIM2	Fas apoptotic inhibitory molecule 2	RNF170	ring finger protein 170
FAM102B	family with sequence similarity 102, member B	RNF187	ring finger protein 187
FAM104A	family with sequence similarity 104, member A	RNF19A	ring finger protein 19A, RBR E3 ubiquitin protein ligase
FAM105A	family with sequence similarity 105, member A	RNF217	ring finger protein 217
FAM105B	family with sequence similarity 105, member B	RNF24	ring finger protein 24
FAM107A	family with sequence similarity 107, member A	RNF38	ring finger protein 38
FAM107B	family with sequence similarity 107, member B	RNF39	ring finger protein 39
FAM110A	family with sequence similarity 110, member A	RNF4	ring finger protein 4
FAM114A2	family with sequence similarity 114, member A2	RNF40	ring finger protein 40, E3 ubiquitin protein ligase
FAM115A	family with sequence similarity 115, member A	RNF43	ring finger protein 43
FAM120AOS	family with sequence similarity 120A opposite strand	RNF44	ring finger protein 44
FAM122B	family with sequence similarity 122B	RNF6	ring finger protein (C3H2C3 type) 6
FAM126A	family with sequence similarity 126, member A	RNF8	ring finger protein 8, E3 ubiquitin protein ligase
FAM126B	family with sequence similarity 126, member B	RNFT2	ring finger protein, transmembrane 2
FAM127C	family with sequence similarity 127, member C	RNLS	renalase, FAD-dependent amine oxidase
FAM129A	family with sequence similarity 129, member A	RNMT	RNA (guanine-7-) methyltransferase
FAM131B	family with sequence similarity 131, member B	ROBO2	roundabout, axon guidance receptor, homolog 2 (Drosophila)
FAM132B	family with sequence similarity 132, member B	ROBO4	roundabout, axon guidance receptor, homolog 4 (Drosophila)
FAM134A	family with sequence similarity 134, member A	ROCK1	Rho-associated, coiled-coil containing protein kinase 1
FAM134C	family with sequence similarity 134, member C	RORA	RAR-related orphan receptor A
FAM135B	family with sequence similarity 135, member B	RORB	RAR-related orphan receptor B
FAM149A	family with sequence similarity 149, member A	RORC	RAR-related orphan receptor C
FAM149B1	family with sequence similarity 149, member B1	RP11-108K14.8	Mitochondrial GTPase 1
FAM154A	family with sequence similarity 154, member A	RP11-1118M6.1	Homo sapiens proline-rich protein 23C-like (LOC100133251), mRNA.
FAM155B	family with sequence similarity 155, member B	RP11-111M22.2	Homo sapiens putative uncharacterized protein FLJ37770-like (LOC100506127), mRNA.
FAM156A	family with sequence similarity 156, member A	RP11-122A3.2	uncharacterized protein LOC100127983
FAM156B	family with sequence similarity 156, member B	RP11-176H8.1	Uncharacterized protein
FAM161A	family with sequence similarity 161, member A	RP11-181C3.1	Uncharacterized protein
FAM163A	family with sequence similarity 163, member A	RP11-192H23.4	Uncharacterized protein
FAM167A	family with sequence similarity 167, member A	RP11-204N11.1	Uncharacterized protein
FAM168A	family with sequence similarity 168, member A	RP11-210M15.2	Uncharacterized protein
FAM169A	family with sequence similarity 169, member A	RP11-297N6.4	Uncharacterized protein
FAM170B	family with sequence similarity 170, member B	RP11-342M21.2	Uncharacterized protein
FAM174B	family with sequence similarity 174, member B	RP11-345J4.3	Uncharacterized protein
FAM179A	family with sequence similarity 179, member A	RP11-347C12.3	Uncharacterized protein
FAM180A	family with sequence similarity 180, member A	RP11-366L20.2	Uncharacterized protein
FAM182B	family with sequence similarity 182, member B	RP11-382J12.1	Uncharacterized protein
FAM184A	family with sequence similarity 184, member A	RP11-383H13.1	Protein LOC100132891; cDNA FLJ53548
FAM184B	family with sequence similarity 184, member B	RP11-404P21.8	Uncharacterized protein
FAM189A1	family with sequence similarity 189, member A1	RP11-47I22.4
FAM192A	family with sequence similarity 192, member A	RP11-480I12.4	Putative inactive alpha-1,3-mannosyl-glycoprotein 4-beta-N-acetylglucosaminyltransferase-like protein LOC641515
FAM196A	family with sequence similarity 196, member A	RP11-644F5.10	Uncharacterized protein
FAM198B	family with sequence similarity 198, member B	RP11-664D7.4	HCG1787533; Uncharacterized protein
FAM208A	family with sequence similarity 208, member A	RP11-770J1.4
FAM20A	family with sequence similarity 20, member A	RP11-834C11.12
FAM210A	family with sequence similarity 210, member A	RP11-863K10.7	Uncharacterized protein
FAM210B	family with sequence similarity 210, member B	RP11-93B14.6	HCG2018282; Uncharacterized protein
FAM211A	family with sequence similarity 211, member A	RP11-9B6.1	HCG2045747; Uncharacterized protein
FAM212B	family with sequence similarity 212, member B	RPAP2	RNA polymerase II associated protein 2
FAM216B	family with sequence similarity 216, member B	RPF2	ribosome production factor 2 homolog (S. cerevisiae)
FAM217B	family with sequence similarity 217, member B	RPH3A	rabphilin 3A homolog (mouse)
FAM219B	family with sequence similarity 219, member B	RPH3AL	rabphilin 3A-like (without C2 domains)
FAM222A	family with sequence similarity 222, member A	RPL12	ribosomal protein L12
FAM222B	family with sequence similarity 222, member B	RPL13	ribosomal protein L13
FAM229B	family with sequence similarity 229, member B	RPL14	ribosomal protein L14
FAM26E	family with sequence similarity 26, member E	RPL24	ribosomal protein L24
FAM3A	family with sequence similarity 3, member A	RPL27A	ribosomal protein L27a
FAM46A	family with sequence similarity 46, member A	RPL31	ribosomal protein L31
FAM49A	family with sequence similarity 49, member A	RPL32	ribosomal protein L32
FAM49B	family with sequence similarity 49, member B	RPL37	ribosomal protein L37
FAM53C	family with sequence similarity 53, member C	RPL37A	ribosomal protein L37a
FAM69A	family with sequence similarity 69, member A	RPL5	ribosomal protein L5
FAM71F2	family with sequence similarity 71, member F2	RPL7L1	ribosomal protein L7-like 1
FAM73A	family with sequence similarity 73, member A	RPN2	ribophorin II
FAM76A	family with sequence similarity 76, member A	RPP14	ribonuclease P/MRP 14kDa subunit
FAM83F	family with sequence similarity 83, member F	RPRD1A	regulation of nuclear pre-mRNA domain containing 1A
FAM83H	family with sequence similarity 83, member H	RPRD1B	regulation of nuclear pre-mRNA domain containing 1B
FAM8A1	family with sequence similarity 8, member A1	RPRD2	regulation of nuclear pre-mRNA domain containing 2
FAM92A1	family with sequence similarity 92, member A1	RPS24	ribosomal protein S24
FANCA	Fanconi anemia, complementation group A	RPS4X	ribosomal protein S4, X-linked
FAR1	fatty acyl CoA reductase 1	RPS6KA2	ribosomal protein S6 kinase, 90kDa, polypeptide 2
FAR2	fatty acyl CoA reductase 2	RPS6KA3	ribosomal protein S6 kinase, 90kDa, polypeptide 3
FARSB	phenylalanyl-tRNA synthetase, beta subunit	RPS6KA5	ribosomal protein S6 kinase, 90kDa, polypeptide 5
FASN	fatty acid synthase	RPS6KC1	ribosomal protein S6 kinase, 52kDa, polypeptide 1
FAT3	FAT atypical cadherin 3	RPTN	repetin
FAXC	failed axon connections homolog (Drosophila)	RRAGD	Ras-related GTP binding D
FBLIM1	filamin binding LIM protein 1	RRN3	RRN3 RNA polymerase I transcription factor homolog (S. cerevisiae)
FBLN5	fibulin 5	RRP12	ribosomal RNA processing 12 homolog (S. cerevisiae)
FBN1	fibrillin 1	RRP15	ribosomal RNA processing 15 homolog (S. cerevisiae)
FBRS	fibrosin	RRP1B	ribosomal RNA processing 1B
FBXL12	F-box and leucine-rich repeat protein 12	RRP7A	ribosomal RNA processing 7 homolog A (S. cerevisiae)
FBXL17	F-box and leucine-rich repeat protein 17	RRP8	ribosomal RNA processing 8, methyltransferase, homolog (yeast)
FBXL18	F-box and leucine-rich repeat protein 18	RSF1	remodeling and spacing factor 1
FBXL20	F-box and leucine-rich repeat protein 20	RSPH10B	radial spoke head 10 homolog B (Chlamydomonas)
FBXL3	F-box and leucine-rich repeat protein 3	RSPH10B2	radial spoke head 10 homolog B2 (Chlamydomonas)
FBXL7	F-box and leucine-rich repeat protein 7	RSPH3	radial spoke 3 homolog (Chlamydomonas)
FBXO28	F-box protein 28	RSPO3	R-spondin 3
FBXO30	F-box protein 30	RSU1	Ras suppressor protein 1
FBXO32	F-box protein 32	RTBDN	retbindin
FBXO41	F-box protein 41	RTF1	Rtf1, Paf1/RNA polymerase II complex component, homolog (S. cerevisiae)
FBXO42	F-box protein 42	RTN4R	reticulon 4 receptor
FBXO47	F-box protein 47	RTN4RL1	reticulon 4 receptor-like 1
FBXO48	F-box protein 48	RTP1	receptor (chemosensory) transporter protein 1
FBXW7	F-box and WD repeat domain containing 7, E3 ubiquitin protein ligase	RTTN	rotatin
FBXW8	F-box and WD repeat domain containing 8	RUFY2	RUN and FYVE domain containing 2
FCGR1A	Fc fragment of IgG, high affinity Ia, receptor (CD64)	RUNDC1	RUN domain containing 1
FCGR1B	Fc fragment of IgG, high affinity Ib, receptor (CD64)	RUNX1	runt-related transcription factor 1
FCGR3A	Fc fragment of IgG, low affinity IIIa, receptor (CD16a)	RUNX1T1	runt-related transcription factor 1; translocated to, 1 (cyclin D-related)
FCN2	ficolin (collagen/fibrinogen domain containing lectin) 2	RUNX2	runt-related transcription factor 2
FCRL2	Fc receptor-like 2	RXRB	retinoid X receptor, beta
FCRL3	Fc receptor-like 3	RYK	receptor-like tyrosine kinase
FCRL4	Fc receptor-like 4	S100A11	S100 calcium binding protein A11
FCRL5	Fc receptor-like 5	S100A2	S100 calcium binding protein A2
FCRL6	Fc receptor-like 6	S100A7A	S100 calcium binding protein A7A
FEM1A	fem-1 homolog a (C. elegans)	S100PBP	S100P binding protein
FEM1C	fem-1 homolog c (C. elegans)	S1PR1	sphingosine-1-phosphate receptor 1
FER	fer (fps/fes related) tyrosine kinase	S1PR3	sphingosine-1-phosphate receptor 3
FFAR4	free fatty acid receptor 4	SAE1	SUMO1 activating enzyme subunit 1
FGB	fibrinogen beta chain	SALL1	sal-like 1 (Drosophila)
FGD4	FYVE, RhoGEF and PH domain containing 4	SAMD11	sterile alpha motif domain containing 11
FGF1	fibroblast growth factor 1 (acidic)	SAMD12	sterile alpha motif domain containing 12
FGF10	fibroblast growth factor 10	SAMD14	sterile alpha motif domain containing 14
FGF5	fibroblast growth factor 5	SAMD4A	sterile alpha motif domain containing 4A
FGF9	fibroblast growth factor 9	SAMD5	sterile alpha motif domain containing 5
FGFBP3	fibroblast growth factor binding protein 3	SAMD9L	sterile alpha motif domain containing 9-like
FGFR1OP	FGFR1 oncogene partner	SAMHD1	SAM domain and HD domain 1
FGL2	fibrinogen-like 2	SAP130	Sin3A-associated protein, 130kDa
FHOD3	formin homology 2 domain containing 3	SAP30	Sin3A-associated protein, 30kDa
FIG4	FIG4 homolog, SAC1 lipid phosphatase domain containing (S. cerevisiae)	SAPCD1	suppressor APC domain containing 1
FITM2	fat storage-inducing transmembrane protein 2	SAR1A	SAR1 homolog A (S. cerevisiae)
FKBP14	FK506 binding protein 14, 22 kDa	SAR1B	SAR1 homolog B (S. cerevisiae)
FKBP15	FK506 binding protein 15, 133kDa	SARM1	sterile alpha and TIR motif containing 1
FKBP1A	FK506 binding protein 1A, 12kDa	SASH1	SAM and SH3 domain containing 1
FKBP1C	FK506 binding protein 1C	SATB2	SATB homeobox 2
FKBP5	FK506 binding protein 5	SAV1	salvador homolog 1 (Drosophila)
FKBP7	FK506 binding protein 7	SCAF8	SR-related CTD-associated factor 8
FKRP	fukutin related protein	SCAI	suppressor of cancer cell invasion
FKTN	fukutin	SCAMP1	secretory carrier membrane protein 1
FLJ00388		SCAMP5	secretory carrier membrane protein 5
FLRT3	fibronectin leucine rich transmembrane protein 3	SCARF1	scavenger receptor class F, member 1
FLVCR2	feline leukemia virus subgroup C cellular receptor family, member 2	SCD	stearoyl-CoA desaturase (delta-9-desaturase)
FLYWCH1	FLYWCH-type zinc finger 1	SCGN	secretagogin, EF-hand calcium binding protein
FMN1	formin 1	SCIMP	SLP adaptor and CSK interacting membrane protein
FMN2	formin 2	SCIN	scinderin
FMO4	flavin containing monooxygenase 4	SCN1A	sodium channel, voltage-gated, type I, alpha subunit
FN1	fibronectin 1	SCN2B	sodium channel, voltage-gated, type II, beta subunit
FN3KRP	fructosamine 3 kinase related protein	SCN3A	sodium channel, voltage-gated, type III, alpha subunit
FNBP1	formin binding protein 1	SCN3B	sodium channel, voltage-gated, type III, beta subunit
FNBP1L	formin binding protein 1-like	SCN5A	sodium channel, voltage-gated, type V, alpha subunit
FNDC1	fibronectin type III domain containing 1	SCNN1B	sodium channel, non-voltage-gated 1, beta subunit
FNDC5	fibronectin type III domain containing 5	SCO1	SCO1 cytochrome c oxidase assembly protein
FNDC9	fibronectin type III domain containing 9	SCOC	short coiled-coil protein
FOCAD	focadhesin	SCP2	sterol carrier protein 2
FOSL1	FOS-like antigen 1	SCRG1	stimulator of chondrogenesis 1
FOSL2	FOS-like antigen 2	SDC1	syndecan 1
FOXC2	forkhead box C2 (MFH-1, mesenchyme forkhead 1)	SDC2	syndecan 2
FOXD2	forkhead box D2	SDC3	syndecan 3
FOXG1	forkhead box G1	SDC4	syndecan 4
FOXK1	forkhead box K1	SDF2	stromal cell-derived factor 2
FOXM1	forkhead box M1	SDHC	succinate dehydrogenase complex, subunit C, integral membrane protein, 15kDa
FOXO1	forkhead box O1	SDK2	sidekick cell adhesion molecule 2
FOXO3	forkhead box O3	SDPR	serum deprivation response
FOXQ1	forkhead box Q1	SEC14L2	SEC14-like 2 (S. cerevisiae)
FOXRED2	FAD-dependent oxidoreductase domain containing 2	SEC16A	SEC16 homolog A (S. cerevisiae)
FP15737	Uncharacterized protein	SEC22A	SEC22 vesicle trafficking protein homolog A (S. cerevisiae)
FPR1	formyl peptide receptor 1	SEC22C	SEC22 vesicle trafficking protein homolog C (S. cerevisiae)
FPR3	formyl peptide receptor 3	SEC63	SEC63 homolog (S. cerevisiae)
FRAS1	Fraser syndrome 1	SECISBP2L	SECIS binding protein 2-like
FRAT1	frequently rearranged in advanced T-cell lymphomas	SELE	selectin E
FRMD4B	FERM domain containing 4B	SELT	Selenoprotein T
FRMD5	FERM domain containing 5	SEMA3A	sema domain, immunoglobulin domain (Ig), short basic domain, secreted, (semaphorin) 3A
FRMD7	FERM domain containing 7	SEMA3C	sema domain, immunoglobulin domain (Ig), short basic domain, secreted, (semaphorin) 3C
FRS2	fibroblast growth factor receptor substrate 2	SEMA5A	sema domain, seven thrombospondin repeats (type 1 and type 1-like), transmembrane domain (TM) and short cytoplasmic domain, (semaphorin) 5A
FSBP	fibrinogen silencer binding protein	SEMA5B	sema domain, seven thrombospondin repeats (type 1 and type 1-like), transmembrane domain (TM) and short cytoplasmic domain, (semaphorin) 5B
FSD1L	fibronectin type III and SPRY domain containing 1-like	SEMA6A	sema domain, transmembrane domain (TM), and cytoplasmic domain, (semaphorin) 6A
FSTL4	follistatin-like 4	SENP5	SUMO1/sentrin specific peptidase 5
FTO	fat mass and obesity associated	SEPT11	septin 11
FUBP3	far upstream element (FUSE) binding protein 3	SEPT3	septin 3
FUCA2	fucosidase, alpha-L- 2, plasma	SEPT7	septin 7
FURIN	furin (paired basic amino acid cleaving enzyme)	SERF1A	small EDRK-rich factor 1A (telomeric)
FUT11	fucosyltransferase 11 (alpha (1,3) fucosyltransferase)	SERF1B	small EDRK-rich factor 1B (centromeric)
FUT9	fucosyltransferase 9 (alpha (1,3) fucosyltransferase)	SERF2	small EDRK-rich factor 2
FXN	frataxin	SERINC1	serine incorporator 1
FXYD2	FXYD domain containing ion transport regulator 2	SERPINA4	serpin peptidase inhibitor, clade A (alpha-1 antiproteinase, antitrypsin), member 4
FXYD4	FXYD domain containing ion transport regulator 4	SERPINB8	serpin peptidase inhibitor, clade B (ovalbumin), member 8
FXYD6-FXYD2	FXYD6-FXYD2 readthrough	SERPINE1	serpin peptidase inhibitor, clade E (nexin, plasminogen activator inhibitor type 1), member 1
FYB	FYN binding protein	SERPING1	serpin peptidase inhibitor, clade G (C1 inhibitor), member 1
FZD3	frizzled family receptor 3	SERTAD1	SERTA domain containing 1
FZD4	frizzled family receptor 4	SERTAD2	SERTA domain containing 2
FZD5	frizzled family receptor 5	SERTAD4	SERTA domain containing 4
FZD8	frizzled family receptor 8	SESN1	sestrin 1
G3BP2	GTPase activating protein (SH3 domain) binding protein 2	SESTD1	SEC14 and spectrin domains 1
G6PC	glucose-6-phosphatase, catalytic subunit	SET	SET nuclear oncogene
G6PC2	glucose-6-phosphatase, catalytic, 2	SETBP1	SET binding protein 1
G6PC3	glucose 6 phosphatase, catalytic, 3	SETD1A	SET domain containing 1A
GAB1	GRB2-associated binding protein 1	SETDB1	SET domain, bifurcated 1
GAB2	GRB2-associated binding protein 2	SEZ6L	seizure related 6 homolog (mouse)-like
GABBR1	gamma-aminobutyric acid (GABA) B receptor, 1	SF1	splicing factor 1
GABPA	GA binding protein transcription factor, alpha subunit 60kDa	SF3A1	splicing factor 3a, subunit 1, 120kDa
GABPB2	GA binding protein transcription factor, beta subunit 2	SF3A3	splicing factor 3a, subunit 3, 60kDa
GABRA2	gamma-aminobutyric acid (GABA) A receptor, alpha 2	SF3B3	splicing factor 3b, subunit 3, 130kDa
GABRA4	gamma-aminobutyric acid (GABA) A receptor, alpha 4	SF3B5	splicing factor 3b, subunit 5, 10kDa
GABRB1	gamma-aminobutyric acid (GABA) A receptor, beta 1	SFMBT1	Scm-like with four mbt domains 1
GABRP	gamma-aminobutyric acid (GABA) A receptor, pi	SFMBT2	Scm-like with four mbt domains 2
GADD45GIP1	growth arrest and DNA-damage-inducible, gamma interacting protein 1	SGCB	sarcoglycan, beta (43kDa dystrophin-associated glycoprotein)
GALK2	galactokinase 2	SGIP1	SH3-domain GRB2-like (endophilin) interacting protein 1
GALNT1	UDP-N-acetyl-alpha-D-galactosamine:polypeptide N-acetylgalactosaminyltransferase 1 (GalNAc-T1)	SGK3	serum/glucocorticoid regulated kinase family, member 3
GALNT10	UDP-N-acetyl-alpha-D-galactosamine:polypeptide N-acetylgalactosaminyltransferase 10 (GalNAc-T10)	SGK494	uncharacterized serine/threonine-protein kinase SgK494
GALNT2	UDP-N-acetyl-alpha-D-galactosamine:polypeptide N-acetylgalactosaminyltransferase 2 (GalNAc-T2)	SGMS1	sphingomyelin synthase 1
GALNT6	UDP-N-acetyl-alpha-D-galactosamine:polypeptide N-acetylgalactosaminyltransferase 6 (GalNAc-T6)	SGSM2	small G protein signaling modulator 2
GALNT7	UDP-N-acetyl-alpha-D-galactosamine:polypeptide N-acetylgalactosaminyltransferase 7 (GalNAc-T7)	SH2B3	SH2B adaptor protein 3
GAN	gigaxonin	SH2D1B	SH2 domain containing 1B
GAPT	GRB2-binding adaptor protein, transmembrane	SH2D4B	SH2 domain containing 4B
GARNL3	GTPase activating Rap/RanGAP domain-like 3	SH2D5	SH2 domain containing 5
GAS2L3	growth arrest-specific 2 like 3	SH2D7	SH2 domain containing 7
GATA6	GATA binding protein 6	SH3BGRL2	SH3 domain binding glutamic acid-rich protein like 2
GATAD1	GATA zinc finger domain containing 1	SH3BP2	SH3-domain binding protein 2
GATAD2B	GATA zinc finger domain containing 2B	SH3BP5	SH3-domain binding protein 5 (BTK-associated)
GATC	glutamyl-tRNA(Gln) amidotransferase, subunit C	SH3PXD2A	SH3 and PX domains 2A
GATS	GATS, stromal antigen 3 opposite strand	SH3PXD2B	SH3 and PX domains 2B
GATSL2	GATS protein-like 2	SH3RF3	SH3 domain containing ring finger 3
GBA	glucosidase, beta, acid	SH3TC2	SH3 domain and tetratricopeptide repeats 2
GBP2	guanylate binding protein 2, interferon-inducible	SHANK2	SH3 and multiple ankyrin repeat domains 2
GBP4	guanylate binding protein 4	SHARPIN	SHANK-associated RH domain interactor
GBX2	gastrulation brain homeobox 2	SHISA3	shisa family member 3
GCAT	glycine C-acetyltransferase	SHISA4	shisa family member 4
GCM2	glial cells missing homolog 2 (Drosophila)	SHISA6	shisa family member 6
GCN1L1	GCN1 general control of amino-acid synthesis 1-like 1 (yeast)	SHISA7	shisa family member 7
GCNT1	glucosaminyl (N-acetyl) transferase 1, core 2	SHISA9	shisa family member 9
GDA	guanine deaminase	SHMT1	serine hydroxymethyltransferase 1 (soluble)
GDF11	growth differentiation factor 11	SHOX	short stature homeobox
GDF5OS	growth differentiation factor 5 opposite strand	SHROOM1	shroom family member 1
GDF7	growth differentiation factor 7	SHROOM4	shroom family member 4
GFER	growth factor, augmenter of liver regeneration	SIGLEC14	sialic acid binding Ig-like lectin 14
GFI1	growth factor independent 1 transcription repressor	SIGLEC5
GFI1B	growth factor independent 1B transcription repressor	SIK2	salt-inducible kinase 2
GFOD1	glucose-fructose oxidoreductase domain containing 1	SIK3	SIK family kinase 3
GFPT2	glutamine-fructose-6-phosphate transaminase 2	SIKE1	suppressor of IKBKE 1
GFRA1	GDNF family receptor alpha 1	SIMC1	SUMO-interacting motifs containing 1
GFRA2	GDNF family receptor alpha 2	SIPA1L3	signal-induced proliferation-associated 1 like 3
GFRA3	GDNF family receptor alpha 3	SIRPB2	signal-regulatory protein beta 2
GGA2	golgi-associated, gamma adaptin ear containing, ARF binding protein 2	SIT1	signaling threshold regulating transmembrane adaptor 1
GGA3	golgi-associated, gamma adaptin ear containing, ARF binding protein 3	SIX1	SIX homeobox 1
GGCT	gamma-glutamylcyclotransferase	SIX5	SIX homeobox 5
GHR	growth hormone receptor	SKAP2	src kinase associated phosphoprotein 2
GHSR	growth hormone secretagogue receptor	SKIDA1	SKI/DACH domain containing 1
GIF	gastric intrinsic factor (vitamin B synthesis)	SKP1	S-phase kinase-associated protein 1
GIMAP8	GTPase, IMAP family member 8	SLA	Src-like-adaptor
GINS2	GINS complex subunit 2 (Psf2 homolog)	SLAMF1	signaling lymphocytic activation molecule family member 1
GIPR	gastric inhibitory polypeptide receptor	SLAMF6	SLAM family member 6
GIT2	G protein-coupled receptor kinase interacting ArfGAP 2	SLAMF8	SLAM family member 8
GJA1	gap junction protein, alpha 1, 43kDa	SLC10A6	solute carrier family 10 (sodium/bile acid cotransporter), member 6
GJA3	gap junction protein, alpha 3, 46kDa	SLC12A2	solute carrier family 12 (sodium/potassium/chloride transporter), member 2
GJA5	gap junction protein, alpha 5, 40kDa	SLC12A6	solute carrier family 12 (potassium/chloride transporter), member 6
GJB1	gap junction protein, beta 1, 32kDa	SLC12A8	solute carrier family 12, member 8
GJB7	gap junction protein, beta 7, 25kDa	SLC15A2	solute carrier family 15 (oligopeptide transporter), member 2
GK	glycerol kinase	SLC16A14	solute carrier family 16, member 14
GLDN	gliomedin	SLC16A3	solute carrier family 16 (monocarboxylate transporter), member 3
GLI2	GLI family zinc finger 2	SLC16A7	solute carrier family 16 (monocarboxylate transporter), member 7
GLI3	GLI family zinc finger 3	SLC17A3	solute carrier family 17 (organic anion transporter), member 3
GLI4	GLI family zinc finger 4	SLC17A7	solute carrier family 17 (vesicular glutamate transporter), member 7
GLIPR2	GLI pathogenesis-related 2	SLC17A8	solute carrier family 17 (vesicular glutamate transporter), member 8
GLOD5	glyoxalase domain containing 5	SLC17A9	solute carrier family 17 (vesicular nucleotide transporter), member 9
GLP2R	glucagon-like peptide 2 receptor	SLC1A1	solute carrier family 1 (neuronal/epithelial high affinity glutamate transporter, system Xag), member 1
GLRA3	glycine receptor, alpha 3	SLC1A2	solute carrier family 1 (glial high affinity glutamate transporter), member 2
GLRX2	glutaredoxin 2	SLC1A7	solute carrier family 1 (glutamate transporter), member 7
GLRX5	glutaredoxin 5	SLC20A2	solute carrier family 20 (phosphate transporter), member 2
GLYAT	glycine-N-acyltransferase	SLC22A1	solute carrier family 22 (organic cation transporter), member 1
GLYR1	glyoxylate reductase 1 homolog (Arabidopsis)	SLC22A11	solute carrier family 22 (organic anion/urate transporter), member 11
GMEB1	glucocorticoid modulatory element binding protein 1	SLC22A13	solute carrier family 22 (organic anion/urate transporter), member 13
GMEB2	glucocorticoid modulatory element binding protein 2	SLC22A14	solute carrier family 22, member 14
GMFB	glia maturation factor, beta	SLC22A2	solute carrier family 22 (organic cation transporter), member 2
GMPS	guanine monphosphate synthase	SLC22A23	solute carrier family 22, member 23
GNA12	guanine nucleotide binding protein (G protein) alpha 12	SLC22A9	solute carrier family 22 (organic anion transporter), member 9
GNAT1	guanine nucleotide binding protein (G protein), alpha transducing activity polypeptide 1	SLC23A2	solute carrier family 23 (ascorbic acid transporter), member 2
GNB5	guanine nucleotide binding protein (G protein), beta 5	SLC24A2	solute carrier family 24 (sodium/potassium/calcium exchanger), member 2
GNE	glucosamine (UDP-N-acetyl)-2-epimerase/N-acetylmannosamine kinase	SLC24A4	solute carrier family 24 (sodium/potassium/calcium exchanger), member 4
GNG11	guanine nucleotide binding protein (G protein), gamma 11	SLC25A10	Mitochondrial dicarboxylate carrier; Uncharacterized protein; cDNA FLJ60124, highly similar to Mitochondrial dicarboxylate carrier
GNG12	guanine nucleotide binding protein (G protein), gamma 12	SLC25A12	solute carrier family 25 (aspartate/glutamate carrier), member 12
GNG2	guanine nucleotide binding protein (G protein), gamma 2	SLC25A16	solute carrier family 25 (mitochondrial carrier; Graves disease autoantigen), member 16
GNG4	guanine nucleotide binding protein (G protein), gamma 4	SLC25A23	solute carrier family 25 (mitochondrial carrier; phosphate carrier), member 23
GNG7	guanine nucleotide binding protein (G protein), gamma 7	SLC25A34	solute carrier family 25, member 34
GNL1	guanine nucleotide binding protein-like 1	SLC25A37	solute carrier family 25 (mitochondrial iron transporter), member 37
GNL3L	guanine nucleotide binding protein-like 3 (nucleolar)-like	SLC25A38	solute carrier family 25, member 38
GNPDA2	glucosamine-6-phosphate deaminase 2	SLC25A4	solute carrier family 25 (mitochondrial carrier; adenine nucleotide translocator), member 4
GNPTG	N-acetylglucosamine-1-phosphate transferase, gamma subunit	SLC25A42	solute carrier family 25, member 42
GNRHR	gonadotropin-releasing hormone receptor	SLC25A43	solute carrier family 25, member 43
GOLGA1	golgin A1	SLC25A53	solute carrier family 25, member 53
GOLGA3	golgin A3	SLC26A2	solute carrier family 26 (anion exchanger), member 2
GOLGA6A	golgin A6 family, member A	SLC26A8	solute carrier family 26 (anion exchanger), member 8
GOLGA6B	golgin A6 family, member B	SLC26A9	solute carrier family 26 (anion exchanger), member 9
GOLGA6C	golgin A6 family, member C	SLC27A1	solute carrier family 27 (fatty acid transporter), member 1
GOLGA6D	golgin A6 family, member D	SLC27A4	solute carrier family 27 (fatty acid transporter), member 4
GOLGA6L1	golgin A6 family-like 1	SLC29A1	solute carrier family 29 (equilibrative nucleoside transporter), member 1
GOLGA6L6	golgin A6 family-like 6	SLC2A10	solute carrier family 2 (facilitated glucose transporter), member 10
GOLGA7	golgin A7	SLC2A12	solute carrier family 2 (facilitated glucose transporter), member 12
GOLGA7B	golgin A7 family, member B	SLC2A13	solute carrier family 2 (facilitated glucose transporter), member 13
GOLGA8A	golgin A8 family, member A	SLC2A4	solute carrier family 2 (facilitated glucose transporter), member 4

## Sheet: Targets miR-214-5p
TargetScan v.7.2: 207 predicted targets for hsa-miR-214-5p in TargetScan						miRDB: 322 predicted targets for hsa-miR-214-5p in miRDB									60 common targets in "miRDB" and "TargetScan":
Gene Symbol	Gene name					Gene Symbol	Gene name								Gene Symbol	Gene name
ABCA10	ATP-binding cassette, sub-family A (ABC1), member 10					ABCG4	ATP binding cassette subfamily G member 4			TP53I3	tumor protein p53 inducible protein 3				ANKRD65	ankyrin repeat domain 65
AFF1	AF4/FMR2 family, member 1					ABHD11	abhydrolase domain containing 11			TPM3	tropomyosin 3				ARMC8	armadillo repeat containing 8
AGO1	argonaute RISC catalytic component 1					ADCY1	adenylate cyclase 1			TRAF2	TNF receptor associated factor 2				BMP8A	bone morphogenetic protein 8a
AIFM2	apoptosis-inducing factor, mitochondrion-associated, 2					ADCY5	adenylate cyclase 5			TRIB2	tribbles pseudokinase 2				BUB3	BUB3, mitotic checkpoint protein
AKT3	v-akt murine thymoma viral oncogene homolog 3					ADCY6	adenylate cyclase 6			TRIM44	tripartite motif containing 44				CISH	cytokine inducible SH2 containing protein
ANKRD52	ankyrin repeat domain 52					ADCYAP1	adenylate cyclase activating polypeptide 1			TRIM71	tripartite motif containing 71				CNTN2	contactin 2
ANKRD65	ankyrin repeat domain 65					AGBL1	ATP/GTP binding protein like 1			TRPM5	transient receptor potential cation channel subfamily M member 5				CRY2	cryptochrome circadian regulator 2
ARMC8	armadillo repeat containing 8					AGO4	argonaute RISC catalytic component 4			TTYH3	tweety family member 3				DDI2	DNA damage inducible 1 homolog 2
ASB6	ankyrin repeat and SOCS box containing 6					AK2	adenylate kinase 2			TUBGCP5	tubulin gamma complex associated protein 5				DPYSL5	dihydropyrimidinase like 5
BMP8A	bone morphogenetic protein 8a					ALS2CL	ALS2 C-terminal like			TVP23A	trans-golgi network vesicle protein 23 homolog A				E2F2	E2F transcription factor 2
BUB3	BUB3 mitotic checkpoint protein					ANAPC16	anaphase promoting complex subunit 16			TVP23C-CDRT4	TVP23C-CDRT4 readthrough				EFCAB2	EF-hand calcium binding domain 2
BZW1	basic leucine zipper and W2 domains 1					ANKRD65	ankyrin repeat domain 65			UBE2G2	ubiquitin conjugating enzyme E2 G2				FASLG	Fas ligand
C14orf1	chromosome 14 open reading frame 1					ANKS1A	ankyrin repeat and sterile alpha motif domain containing 1A			UBE2K	ubiquitin conjugating enzyme E2 K				GFRA1	GDNF family receptor alpha 1
C15orf52	chromosome 15 open reading frame 52					APOL6	apolipoprotein L6			UBXN2B	UBX domain protein 2B				GPR173	G protein-coupled receptor 173
C5orf27	chromosome 5 open reading frame 27					ARHGAP28	Rho GTPase activating protein 28			UNC5A	unc-5 netrin receptor A				GPR39	G protein-coupled receptor 39
C8orf46	chromosome 8 open reading frame 46					ARHGEF4	Rho guanine nucleotide exchange factor 4			UNC5C	unc-5 netrin receptor C				HECW2	HECT, C2 and WW domain containing E3 ubiquitin protein ligase 2
CBLN3	cerebellin 3 precursor					ARL4A	ADP ribosylation factor like GTPase 4A			URI1	URI1, prefoldin like chaperone				HNRNPF	heterogeneous nuclear ribonucleoprotein F
CBX5	chromobox homolog 5					ARMC8	armadillo repeat containing 8			VPS26B	VPS26, retromer complex component B				HNRNPUL1	heterogeneous nuclear ribonucleoprotein U like 1
CD180	CD180 molecule					ARMH3	armadillo-like helical domain containing 3			VPS37C	VPS37C, ESCRT-I subunit				IL13RA1	interleukin 13 receptor subunit alpha 1
CDC27	cell division cycle 27					ARSB	arylsulfatase B			WASL	Wiskott-Aldrich syndrome like				ITGA10	integrin subunit alpha 10
CENPO	centromere protein O					ASB4	ankyrin repeat and SOCS box containing 4			WBP1L	WW domain binding protein 1 like				JAG1	jagged 1
CEP41	centrosomal protein 41kDa					ATG13	autophagy related 13			WDR35	WD repeat domain 35				KANSL1L	KAT8 regulatory NSL complex subunit 1 like
CFL2	cofilin 2 (muscle)					ATP7B	ATPase copper transporting beta			WDR55	WD repeat domain 55				KDM2A	lysine demethylase 2A
CISH	cytokine inducible SH2-containing protein					AVPI1	arginine vasopressin induced 1			WFDC13	WAP four-disulfide core domain 13				KLF12	Kruppel like factor 12
CNNM1	cyclin M1					AWAT1	acyl-CoA wax alcohol acyltransferase 1			WNT2	Wnt family member 2				KLF5	Kruppel like factor 5
CNTN2	contactin 2 (axonal)					BEND3	BEN domain containing 3			WTAP	WT1 associated protein				LRRN1	leucine rich repeat neuronal 1
CRIM1	cysteine rich transmembrane BMP regulator 1 (chordin-like)					BHLHB9	basic helix-loop-helix family member b9			XKR5	XK related 5				MFSD6	major facilitator superfamily domain containing 6
CRY2	cryptochrome 2 (photolyase-like)					BHLHE41	basic helix-loop-helix family member e41			YEATS4	YEATS domain containing 4				MICAL3	microtubule associated monooxygenase, calponin and LIM domain containing 3
CTIF	CBP80/20-dependent translation initiation factor					BMP8A	bone morphogenetic protein 8a			ZBTB4	zinc finger and BTB domain containing 4				MYOG	myogenin
CXCR5	chemokine (C-X-C motif) receptor 5					BPGM	bisphosphoglycerate mutase			ZCCHC14	zinc finger CCHC-type containing 14				NAGA	alpha-N-acetylgalactosaminidase
CYB561	cytochrome b561					BRD1	bromodomain containing 1			ZFAND5	zinc finger AN1-type containing 5				NBR1	NBR1, autophagy cargo receptor
DBNL	drebrin-like					BUB3	BUB3, mitotic checkpoint protein			ZFP3	ZFP3 zinc finger protein				NCOA2	nuclear receptor coactivator 2
DDI2	DNA-damage inducible 1 homolog 2 (S. cerevisiae)					C12orf29	chromosome 12 open reading frame 29			ZNF287	zinc finger protein 287				NELL2	neural EGFL like 2
DLGAP4	discs, large (Drosophila) homolog-associated protein 4					C14orf132	chromosome 14 open reading frame 132			ZNF37A	zinc finger protein 37A				NXF1	nuclear RNA export factor 1
DLST	dihydrolipoamide S-succinyltransferase (E2 component of 2-oxo-glutarate complex)					C1orf21	chromosome 1 open reading frame 21			ZNF384	zinc finger protein 384				PARS2	prolyl-tRNA synthetase 2, mitochondrial
DNAJC16	DnaJ (Hsp40) homolog, subfamily C, member 16					C1QL2	complement C1q like 2			ZNF471	zinc finger protein 471				PDE3B	phosphodiesterase 3B
DPY19L1	dpy-19-like 1 (C. elegans)					C21orf91	chromosome 21 open reading frame 91			ZNF480	zinc finger protein 480				PDK3	pyruvate dehydrogenase kinase 3
DPYSL3	dihydropyrimidinase-like 3					C2orf48	chromosome 2 open reading frame 48			ZNF562	zinc finger protein 562				PGS1	phosphatidylglycerophosphate synthase 1
DPYSL5	dihydropyrimidinase-like 5					C9orf170	chromosome 9 open reading frame 170			ZNF704	zinc finger protein 704				PPM1A	phosphodiesterase 3B
E2F2	E2F transcription factor 2					CAB39L	calcium binding protein 39 like			ZNF716	zinc finger protein 716				PPTC7	PTC7 protein phosphatase homolog
EFCAB2	EF-hand calcium binding domain 2					CACNG8	calcium voltage-gated channel auxiliary subunit gamma 8								PRPF4B	pre-mRNA processing factor 4B
ELMOD3	ELMO/CED-12 domain containing 3					CAMK1D	calcium/calmodulin dependent protein kinase ID								RBM24	RNA binding motif protein 24
FAM169A	family with sequence similarity 169, member A					CAMK1G	calcium/calmodulin dependent protein kinase IG								SLC43A1	solute carrier family 43 member 1
FAM222B	family with sequence similarity 222, member B					CASTOR2	cytosolic arginine sensor for mTORC1 subunit 2								SMAD4	SMAD family member 4
FANCA	Fanconi anemia, complementation group A					CCDC85C	coiled-coil domain containing 85C								SNAP25	synaptosome associated protein 25
FASLG	Fas ligand (TNF superfamily, member 6)					CCDC9B	coiled-coil domain containing 9B								SOX4	SRY-box 4
FGF2	fibroblast growth factor 2 (basic)					CCR2	C-C motif chemokine receptor 2								ST8SIA2	ST8 alpha-N-acetyl-neuraminide alpha-2,8-sialyltransferase 2
FLNB	filamin B, beta					CD28	CD28 molecule								STK35	serine/threonine kinase 35
FOPNL	FGFR1OP N-terminal like					CD302	CD302 molecule								SUZ12	SUZ12, polycomb repressive complex 2 subunit
FOXP2	forkhead box P2					CD52	CD52 molecule								TAF10	TATA-box binding protein associated factor 10
FTSJ2	FtsJ RNA methyltransferase homolog 2 (E. coli)					CDC23	cell division cycle 23								TERF2	telomeric repeat binding factor 2
GBX2	gastrulation brain homeobox 2					CDH13	cadherin 13								TFDP1	transcription factor Dp-1
GFRA1	GDNF family receptor alpha 1					CDHR1	cadherin related family member 1								TMEM151B	transmembrane protein 151B
GINS2	GINS complex subunit 2 (Psf2 homolog)					CDRT4	CMT1A duplicated region transcript 4								TNFSF15	TNF superfamily member 15
GLYCTK	glycerate kinase					CEP104	centrosomal protein 104								TRIM44	tripartite motif containing 44
GPR173	G protein-coupled receptor 173					CEP68	centrosomal protein 68								TRIM71	tripartite motif containing 71
GPR39	G protein-coupled receptor 39					CHL1	cell adhesion molecule L1 like								UBXN2B	UBX domain protein 2B
HAP1	huntingtin-associated protein 1					CHRNB2	cholinergic receptor nicotinic beta 2 subunit								URI1	URI1, prefoldin like chaperone
HDC	histidine decarboxylase					CIITA	class II major histocompatibility complex transactivator								WASL	Wiskott-Aldrich syndrome like
HECW2	HECT, C2 and WW domain containing E3 ubiquitin protein ligase 2					CISD3	CDGSH iron sulfur domain 3								ZFAND5	zinc finger AN1-type containing 5
HMG20A	high mobility group 20A					CISH	cytokine inducible SH2 containing protein
HNRNPA0	heterogeneous nuclear ribonucleoprotein A0					CLBA1	clathrin binding box of aftiphilin containing 1
HNRNPF	heterogeneous nuclear ribonucleoprotein F					CNR1	cannabinoid receptor 1
HNRNPUL1	heterogeneous nuclear ribonucleoprotein U-like 1					CNTF	ciliary neurotrophic factor
HOXA13	homeobox A13					CNTN2	contactin 2
HSPA4	heat shock 70kDa protein 4					COL18A1	collagen type XVIII alpha 1 chain
HSPA4L	heat shock 70kDa protein 4-like					COLGALT1	collagen beta(1-O)galactosyltransferase 1
IGDCC4	immunoglobulin superfamily, DCC subclass, member 4					COMMD5	COMM domain containing 5
IGFBP5	insulin-like growth factor binding protein 5					COQ8A	coenzyme Q8A
IL13RA1	interleukin 13 receptor, alpha 1					CRY2	cryptochrome circadian regulator 2
INF2	inverted formin, FH2 and WH2 domain containing					CSF1	colony stimulating factor 1
INO80	INO80 complex subunit					CSF2RB	colony stimulating factor 2 receptor beta common subunit
IQCG	IQ motif containing G					CSGALNACT2	chondroitin sulfate N-acetylgalactosaminyltransferase 2
IRS4	insulin receptor substrate 4					CYP27C1	cytochrome P450 family 27 subfamily C member 1
IRX5	iroquois homeobox 5					CYP2B6	cytochrome P450 family 2 subfamily B member 6
ITGA10	integrin, alpha 10					CYP2W1	cytochrome P450 family 2 subfamily W member 1
ITGA9	integrin, alpha 9					CYP8B1	cytochrome P450 family 8 subfamily B member 1
ITPKC	inositol-trisphosphate 3-kinase C					CYYR1	cysteine and tyrosine rich 1
JAG1	jagged 1					DAB1	DAB1, reelin adaptor protein
KANSL1L	KAT8 regulatory NSL complex subunit 1-like					DCC	DCC netrin 1 receptor
KCNC4	potassium voltage-gated channel, Shaw-related subfamily, member 4					DCDC1	doublecortin domain containing 1
KCNK5	potassium channel, subfamily K, member 5					DDAH1	dimethylarginine dimethylaminohydrolase 1
KCNMB4	potassium large conductance calcium-activated channel, subfamily M, beta member 4					DDI2	DNA damage inducible 1 homolog 2
KDM2A	lysine (K)-specific demethylase 2A					DHX8	DEAH-box helicase 8
KIAA1755	KIAA1755					DISC1	DISC1 scaffold protein
KLF10	Kruppel-like factor 10					DNAL1	dynein axonemal light chain 1
KLF12	Kruppel-like factor 12					DPY19L2	dpy-19 like 2
KLF5	Kruppel-like factor 5 (intestinal)					DPYSL5	dihydropyrimidinase like 5
LGSN	lengsin, lens protein with glutamine synthetase domain					DTNBP1	dystrobrevin binding protein 1
LHX4	LIM homeobox 4					DZIP1	DAZ interacting zinc finger protein 1
LRRN1	leucine rich repeat neuronal 1					E2F2	E2F transcription factor 2
MARVELD1	MARVEL domain containing 1					EFCAB2	EF-hand calcium binding domain 2
MBNL1	muscleblind-like splicing regulator 1					EFNA1	ephrin A1
MFGE8	milk fat globule-EGF factor 8 protein					EGFLAM	EGF like, fibronectin type III and laminin G domains
MFI2	antigen p97 (melanoma associated) identified by monoclonal antibodies 133.2 and 96.5					ELAVL4	ELAV like RNA binding protein 4
MFSD6	major facilitator superfamily domain containing 6					ELF3	E74 like ETS transcription factor 3
MGAT5	mannosyl (alpha-1,6-)-glycoprotein beta-1,6-N-acetyl-glucosaminyltransferase					EPB41	erythrocyte membrane protein band 4.1
MICAL3	microtubule associated monooxygenase, calponin and LIM domain containing 3					EPHA7	EPH receptor A7
MRPL17	mitochondrial ribosomal protein L17					ERCC6L2	ERCC excision repair 6 like 2
MTMR3	myotubularin related protein 3					EYA1	EYA transcriptional coactivator and phosphatase 1
MYOG	myogenin (myogenic factor 4)					F10	coagulation factor X
NAGA	N-acetylgalactosaminidase, alpha-					FAM234B	family with sequence similarity 234 member B
NBR1	neighbor of BRCA1 gene 1					FASLG	Fas ligand
NCOA2	nuclear receptor coactivator 2					FBH1	F-box DNA helicase 1
NDUFB9	NADH dehydrogenase (ubiquinone) 1 beta subcomplex, 9, 22kDa					FBXO28	F-box protein 28
NELL2	NEL-like 2 (chicken)					FECH	ferrochelatase
NFAM1	NFAT activating protein with ITAM motif 1					FEM1C	fem-1 homolog C
NHEJ1	nonhomologous end-joining factor 1					FGF13	fibroblast growth factor 13
NR6A1	nuclear receptor subfamily 6, group A, member 1					FYCO1	FYVE and coiled-coil domain containing 1
NSUN5	NOP2/Sun domain family, member 5					GAB2	GRB2 associated binding protein 2
NXF1	nuclear RNA export factor 1					GATA5	GATA binding protein 5
ONECUT3	one cut homeobox 3					GCNT4	glucosaminyl (N-acetyl) transferase 4
OSR1	odd-skipped related 1 (Drosophila)					GFRA1	GDNF family receptor alpha 1
OXER1	oxoeicosanoid (OXE) receptor 1					GLT1D1	glycosyltransferase 1 domain containing 1
PAK4	p21 protein (Cdc42/Rac)-activated kinase 4					GNAL	G protein subunit alpha L
PARS2	prolyl-tRNA synthetase 2, mitochondrial (putative)					GPAT4	glycerol-3-phosphate acyltransferase 4
PAX8	paired box 8					GPR173	G protein-coupled receptor 173
PCGF3	polycomb group ring finger 3					GPR39	G protein-coupled receptor 39
PDE3B	phosphodiesterase 3B, cGMP-inhibited					GPSM1	G protein signaling modulator 1
PDGFRA	platelet-derived growth factor receptor, alpha polypeptide					GRIN3A	glutamate ionotropic receptor NMDA type subunit 3A
PDK3	pyruvate dehydrogenase kinase, isozyme 3					HECW2	HECT, C2 and WW domain containing E3 ubiquitin protein ligase 2
PGS1	phosphatidylglycerophosphate synthase 1					HIF3A	hypoxia inducible factor 3 subunit alpha
PHKA2	phosphorylase kinase, alpha 2 (liver)					HMGN3	high mobility group nucleosomal binding domain 3
PIP4K2B	phosphatidylinositol-5-phosphate 4-kinase, type II, beta					HNRNPF	heterogeneous nuclear ribonucleoprotein F
PITPNA	phosphatidylinositol transfer protein, alpha					HNRNPUL1	heterogeneous nuclear ribonucleoprotein U like 1
PLAGL2	pleiomorphic adenoma gene-like 2					HS3ST3B1	heparan sulfate-glucosamine 3-sulfotransferase 3B1
PLXNB2	plexin B2					HSF1	heat shock transcription factor 1
POMT2	protein-O-mannosyltransferase 2					ICAM2	intercellular adhesion molecule 2
POU2F2	POU class 2 homeobox 2					IKZF5	IKAROS family zinc finger 5
PPM1A	protein phosphatase, Mg2+/Mn2+ dependent, 1A					IL13RA1	interleukin 13 receptor subunit alpha 1
PPTC7	PTC7 protein phosphatase homolog (S. cerevisiae)					INHBA	inhibin subunit beta A
PRPF4B	pre-mRNA processing factor 4B					IQGAP1	IQ motif containing GTPase activating protein 1
PTPRJ	protein tyrosine phosphatase, receptor type, J					IQSEC3	IQ motif and Sec7 domain 3
PWWP2A	PWWP domain containing 2A					IRGQ	immunity related GTPase Q
QTRTD1	queuine tRNA-ribosyltransferase domain containing 1					ITGA10	integrin subunit alpha 10
RAB30	RAB30, member RAS oncogene family					ITGA3	integrin subunit alpha 3
RABEP2	rabaptin, RAB GTPase binding effector protein 2					ITPR2	inositol 1,4,5-trisphosphate receptor type 2
RBM24	RNA binding motif protein 24					JAG1	jagged 1
RBM28	RNA binding motif protein 28					JRK	Jrk helix-turn-helix protein
RGAG4	retrotransposon gag domain containing 4					KANSL1L	KAT8 regulatory NSL complex subunit 1 like
RNF214	ring finger protein 214					KATNAL1	katanin catalytic subunit A1 like 1
ROCK1	Rho-associated, coiled-coil containing protein kinase 1					KATNBL1	katanin regulatory subunit B1 like 1
RORB	RAR-related orphan receptor B					KCTD10	potassium channel tetramerization domain containing 10
RP11-422N16.3	Uncharacterized protein					KCTD7	potassium channel tetramerization domain containing 7
RP11-770J1.4						KDM2A	lysine demethylase 2A
RPL9	ribosomal protein L9					KIAA0513	KIAA0513
RPS21	ribosomal protein S21					KL	klotho
RRP8	ribosomal RNA processing 8, methyltransferase, homolog (yeast)					KLF12	Kruppel like factor 12
SEMA4C	sema domain, immunoglobulin domain (Ig), transmembrane domain (TM) and short cytoplasmic domain, (semaphorin) 4C					KLF5	Kruppel like factor 5
SEPN1	selenoprotein N, 1					KLF8	Kruppel like factor 8
SERTAD4	SERTA domain containing 4					L1CAM	L1 cell adhesion molecule
SETD3	SET domain containing 3					LARP1B	La ribonucleoprotein domain family member 1B
SGSM2	small G protein signaling modulator 2					LOC100132813	uncharacterized LOC100132813
SIX1	SIX homeobox 1					LOC101928120	uncharacterized LOC101928120
SLC25A11	solute carrier family 25 (mitochondrial carrier; oxoglutarate carrier), member 11					LONRF2	LON peptidase N-terminal domain and ring finger 2
SLC29A1	solute carrier family 29 (equilibrative nucleoside transporter), member 1					LRRC75A	leucine rich repeat containing 75A
SLC43A1	solute carrier family 43 (amino acid system L transporter), member 1					LRRN1	leucine rich repeat neuronal 1
SMAD4	SMAD family member 4					LRTOMT	leucine rich transmembrane and O-methyltransferase domain containing
SMARCC2	SWI/SNF related, matrix associated, actin dependent regulator of chromatin, subfamily c, member 2					LSM8	LSM8 homolog, U6 small nuclear RNA associated
SMC1A	structural maintenance of chromosomes 1A					LUC7L3	LUC7 like 3 pre-mRNA splicing factor
SNAP25	synaptosomal-associated protein, 25kDa					LY75-CD302	LY75-CD302 readthrough
SNX11	sorting nexin 11					MAN1C1	mannosidase alpha class 1C member 1
SOX4	SRY (sex determining region Y)-box 4					MAP7D2	MAP7 domain containing 2
SPPL3	signal peptide peptidase like 3					MAPT	microtubule associated protein tau
SRGAP3	SLIT-ROBO Rho GTPase activating protein 3					MCM4	minichromosome maintenance complex component 4
ST8SIA2	ST8 alpha-N-acetyl-neuraminide alpha-2,8-sialyltransferase 2					MFSD6	major facilitator superfamily domain containing 6
STK24	serine/threonine kinase 24					MICAL3	microtubule associated monooxygenase, calponin and LIM domain containing 3
STK35	serine/threonine kinase 35					MKLN1	muskelin 1
SUZ12	SUZ12 polycomb repressive complex 2 subunit					MLF2	myeloid leukemia factor 2
TAF10	TAF10 RNA polymerase II, TATA box binding protein (TBP)-associated factor, 30kDa					MOG	myelin oligodendrocyte glycoprotein
TCEANC2	transcription elongation factor A (SII) N-terminal and central domain containing 2					MRPL43	mitochondrial ribosomal protein L43
TENM2	teneurin transmembrane protein 2					MSI2	musashi RNA binding protein 2
TERF2	telomeric repeat binding factor 2					MUC5B	mucin 5B, oligomeric mucus/gel-forming
TFDP1	transcription factor Dp-1					MXD1	MAX dimerization protein 1
THBD	thrombomodulin					MYH2	myosin heavy chain 2
TIFAB	TRAF-interacting protein with forkhead-associated domain, family member B					MYOG	myogenin
TMED7-TICAM2	TMED7-TICAM2 readthrough					NACC1	nucleus accumbens associated 1
TMEM151B	transmembrane protein 151B					NAGA	alpha-N-acetylgalactosaminidase
TMEM30A	transmembrane protein 30A					NBR1	NBR1, autophagy cargo receptor
TMEM51	transmembrane protein 51					NCKAP1L	NCK associated protein 1 like
TNFSF15	tumor necrosis factor (ligand) superfamily, member 15					NCKIPSD	NCK interacting protein with SH3 domain
TNIK	TRAF2 and NCK interacting kinase					NCOA2	nuclear receptor coactivator 2
TNMD	tenomodulin					NECTIN1	nectin cell adhesion molecule 1
TRIM44	tripartite motif containing 44					NELL2	neural EGFL like 2
TRIM71	tripartite motif containing 71, E3 ubiquitin protein ligase					NFE2L1	nuclear factor, erythroid 2 like 1
TSKU	tsukushi, small leucine rich proteoglycan					NOP9	NOP9 nucleolar protein
TTF2	transcription termination factor, RNA polymerase II					NUDT5	nudix hydrolase 5
TWIST1	twist basic helix-loop-helix transcription factor 1					NXF1	nuclear RNA export factor 1
UBXN2B	UBX domain protein 2B					OAS1	2'-5'-oligoadenylate synthetase 1
UBXN7	UBX domain protein 7					OCM	oncomodulin
UPF2	UPF2 regulator of nonsense transcripts homolog (yeast)					ORAI2	ORAI calcium release-activated calcium modulator 2
URI1	URI1, prefoldin-like chaperone					OVOL1	ovo like transcriptional repressor 1
USH1G	Usher syndrome 1G (autosomal recessive)					PARS2	prolyl-tRNA synthetase 2, mitochondrial
USP27X	ubiquitin specific peptidase 27, X-linked					PBX1	PBX homeobox 1
VPS53	vacuolar protein sorting 53 homolog (S. cerevisiae)					PDE3B	phosphodiesterase 3B
VTI1A	vesicle transport through interaction with t-SNAREs 1A					PDK3	pyruvate dehydrogenase kinase 3
WASL	Wiskott-Aldrich syndrome-like					PERM1	PPARGC1 and ESRR induced regulator, muscle 1
WIZ	widely interspaced zinc finger motifs					PGS1	phosphatidylglycerophosphate synthase 1
WSCD1	WSC domain containing 1					PHETA1	PH domain containing endocytic trafficking adaptor 1
WWC1	WW and C2 domain containing 1					PIAS2	protein inhibitor of activated STAT 2
YAF2	YY1 associated factor 2					PIAS3	protein inhibitor of activated STAT 3
ZBTB20	zinc finger and BTB domain containing 20					PIGX	phosphatidylinositol glycan anchor biosynthesis class X
ZDHHC18	zinc finger, DHHC-type containing 18					PLAUR	plasminogen activator, urokinase receptor
ZFAND5	zinc finger, AN1-type domain 5					PLEKHF1	pleckstrin homology and FYVE domain containing 1
ZG16	zymogen granule protein 16					PLEKHG4B	pleckstrin homology and RhoGEF domain containing G4B
ZNF148	zinc finger protein 148					PODN	podocan
ZNF207	zinc finger protein 207					POLH	DNA polymerase eta
						POMGNT1	protein O-linked mannose N-acetylglucosaminyltransferase 1 (beta 1,2-)
						POU3F3	POU class 3 homeobox 3
						PPL	periplakin
						PPM1A	phosphodiesterase 3B
						PPP1R3B	pyruvate dehydrogenase kinase 3
						PPTC7	PTC7 protein phosphatase homolog
						PREP	prolyl endopeptidase
						PRMT2	protein arginine methyltransferase 2
						PROCA1	protein interacting with cyclin A1
						PRPF4B	pre-mRNA processing factor 4B
						PRRG1	proline rich and Gla domain 1
						PRX	periaxin
						PSD3	pleckstrin and Sec7 domain containing 3
						PSMF1	proteasome inhibitor subunit 1
						PTBP1	polypyrimidine tract binding protein 1
						PTGDR2	prostaglandin D2 receptor 2
						PTGIS	prostaglandin I2 synthase
						QTRT2	queuine tRNA-ribosyltransferase accessory subunit 2
						RAB6B	RAB6B, member RAS oncogene family
						RAD23B	RAD23 homolog B, nucleotide excision repair protein
						RBFOX2	RNA binding fox-1 homolog 2
						RBM18	RNA binding motif protein 18
						RBM24	RNA binding motif protein 24
						RIBC1	RIB43A domain with coiled-coils 1
						RNF144A	ring finger protein 144A
						RNF186	ring finger protein 186
						RNLS	renalase, FAD dependent amine oxidase
						RPL31	ribosomal protein L31
						RPS23	ribosomal protein S23
						RPS6KC1	ribosomal protein S6 kinase C1
						RS1	retinoschisin 1
						RTL9	retrotransposon Gag like 9
						RWDD4	RWD domain containing 4
						SAE1	SUMO1 activating enzyme subunit 1
						SAP30BP	SAP30 binding protein
						SCARA3	scavenger receptor class A member 3
						SEPHS1	selenophosphate synthetase 1
						SERPINB8	serpin family B member 8
						SIAH2	siah E3 ubiquitin protein ligase 2
						SLC12A1	solute carrier family 12 member 1
						SLC1A2	solute carrier family 1 member 2
						SLC25A5	solute carrier family 25 member 5
						SLC28A3	solute carrier family 28 member 3
						SLC2A1	solute carrier family 2 member 1
						SLC30A8	solute carrier family 30 member 8
						SLC35A3	solute carrier family 35 member A3
						SLC43A1	solute carrier family 43 member 1
						SLC46A3	solute carrier family 46 member 3
						SLCO3A1	solute carrier organic anion transporter family member 3A1
						SMAD4	SMAD family member 4
						SMOC1	SPARC related modular calcium binding 1
						SNAP25	synaptosome associated protein 25
						SNAPC5	small nuclear RNA activating complex polypeptide 5
						SOX4	SRY-box 4
						SPG21	SPG21, maspardin
						SRP72	signal recognition particle 72
						ST8SIA2	ST8 alpha-N-acetyl-neuraminide alpha-2,8-sialyltransferase 2
						ST8SIA3	ST8 alpha-N-acetyl-neuraminide alpha-2,8-sialyltransferase 3
						STK32A	serine/threonine kinase 32A
						STK35	serine/threonine kinase 35
						SUZ12	SUZ12, polycomb repressive complex 2 subunit
						TAF10	TATA-box binding protein associated factor 10
						TAOK2	TAO kinase 2
						TERF2	telomeric repeat binding factor 2
						TFDP1	transcription factor Dp-1
						TIRAP	TIR domain containing adaptor protein
						TLE2	TLE family member 2, transcriptional corepressor
						TLN2	talin 2
						TMEM144	transmembrane protein 144
						TMEM151B	transmembrane protein 151B
						TMEM170A	transmembrane protein 170A
						TMEM201	transmembrane protein 201
						TMEM239	transmembrane protein 239
						TNFSF15	TNF superfamily member 15
						TNKS	tankyrase

## Sheet: Targets miR-2467-5p
TargetScan v.7.2: 4343 predicted targets for hsa-miR-2467-5p in TargetScan										miRDB: 549 predicted targets for hsa-miR-2467-5p in miRDB						485 common targets in "miRDB" and "TargetScan":
Gene Symbol	Gene name			IL7R	interleukin 7 receptor					Gene Symbol	Gene name					Gene Symbol	Gene name
AAK1	AP2 associated kinase 1			ILDR2	immunoglobulin-like domain containing receptor 2					AAK1	AP2 associated kinase 1					AAK1	AP2 associated kinase 1
AATK	apoptosis-associated tyrosine kinase			ILF3	interleukin enhancer binding factor 3, 90kDa					ABL2	ABL proto-oncogene 2, non-receptor tyrosine kinase					ABL2	ABL proto-oncogene 2, non-receptor tyrosine kinase
ABCA10	ATP-binding cassette, sub-family A (ABC1), member 10			IMPA1	inositol(myo)-1(or 4)-monophosphatase 1					ABR	ABR, RhoGEF and GTPase activating protein					ABR	ABR, RhoGEF and GTPase activating protein
ABCA5	ATP-binding cassette, sub-family A (ABC1), member 5			IMPA2	inositol(myo)-1(or 4)-monophosphatase 2					ACOD1	aconitate decarboxylase 1					ACTR3	ARP3 actin related protein 3 homolog
ABCB8	ATP-binding cassette, sub-family B (MDR/TAP), member 8			IMPG1	interphotoreceptor matrix proteoglycan 1					ACTR3	ARP3 actin related protein 3 homolog					ACVR2B	activin A receptor type 2B
ABCC1	ATP-binding cassette, sub-family C (CFTR/MRP), member 1			INADL	InaD-like (Drosophila)					ACVR2B	activin A receptor type 2B					ADAMTSL5	ADAMTS like 5
ABCD4	ATP-binding cassette, sub-family D (ALD), member 4			ING5	inhibitor of growth family, member 5					ADAM12	ADAM metallopeptidase domain 12					ADD1	adducin 1
ABCF1	ATP-binding cassette, sub-family F (GCN20), member 1			INIP	INTS3 and NABP interacting protein					ADAMTSL5	ADAMTS like 5					ADIPOR2	adiponectin receptor 2
ABCF2	ATP-binding cassette, sub-family F (GCN20), member 2			INO80	INO80 complex subunit					ADCY1	adenylate cyclase 1					AFAP1L1	actin filament associated protein 1 like 1
ABCF3	ATP-binding cassette, sub-family F (GCN20), member 3			INPP4B	inositol polyphosphate-4-phosphatase, type II, 105kDa					ADD1	adducin 1					AFF2	AF4/FMR2 family member 2
ABCG8	ATP-binding cassette, sub-family G (WHITE), member 8			INPP5A	inositol polyphosphate-5-phosphatase, 40kDa					ADIPOR2	adiponectin receptor 2					AGPS	alkylglycerone phosphate synthase
ABHD14B	abhydrolase domain containing 14B			INPP5J	inositol polyphosphate-5-phosphatase J					AFAP1L1	actin filament associated protein 1 like 1					ALDH3B2	aldehyde dehydrogenase 3 family member B2
ABHD15	abhydrolase domain containing 15			INS-IGF2	INS-IGF2 readthrough					AFF2	AF4/FMR2 family member 2					AMZ1	archaelysin family metallopeptidase 1
ABHD17A	abhydrolase domain containing 17A			INSL3	insulin-like 3 (Leydig cell)					AGPS	alkylglycerone phosphate synthase					ANGPT4	angiopoietin 4
ABHD17C	abhydrolase domain containing 17C			INSM1	insulinoma-associated 1					ALDH3B2	aldehyde dehydrogenase 3 family member B2					ANK1	ankyrin 1
ABHD4	abhydrolase domain containing 4			INSR	insulin receptor					AMZ1	archaelysin family metallopeptidase 1					ANO10	anoctamin 10
ABL1	c-abl oncogene 1, non-receptor tyrosine kinase			INSRR	insulin receptor-related receptor					ANGPT4	angiopoietin 4					ANP32E	acidic nuclear phosphoprotein 32 family member E
ABL2	c-abl oncogene 2, non-receptor tyrosine kinase			INTU	inturned planar cell polarity protein					ANK1	ankyrin 1					AP3S2	adaptor related protein complex 3 subunit sigma 2
ABLIM1	actin binding LIM protein 1			IPMK	inositol polyphosphate multikinase					ANKRD46	ankyrin repeat domain 46					AP5Z1	adaptor related protein complex 5 subunit zeta 1
ABLIM3	actin binding LIM protein family, member 3			IPO11	importin 11					ANKUB1	ankyrin repeat and ubiquitin domain containing 1					APLP2	amyloid beta precursor like protein 2
ABR	active BCR-related			IQGAP1	IQ motif containing GTPase activating protein 1					ANO10	anoctamin 10					ARL10	ADP ribosylation factor like GTPase 10
AC000003.2	CDNA FLJ25865 fis, clone CBR01927			IQSEC1	IQ motif and Sec7 domain 1					ANP32E	acidic nuclear phosphoprotein 32 family member E					ARMC8	armadillo repeat containing 8
AC002451.1	Protein LOC100996577			IRAK1	interleukin-1 receptor-associated kinase 1					AP3S2	adaptor related protein complex 3 subunit sigma 2					ASCC2	activating signal cointegrator 1 complex subunit 2
AC002472.13	Leucine-rich repeat-containing protein LOC400891			IRAK3	interleukin-1 receptor-associated kinase 3					AP5Z1	adaptor related protein complex 5 subunit zeta 1					ASCL2	achaete-scute family bHLH transcription factor 2
AC005003.1	CDNA FLJ20464 fis, clone KAT06158; HCG1777549; Uncharacterized protein			IRAK4	interleukin-1 receptor-associated kinase 4					APLP2	amyloid beta precursor like protein 2					ATCAY	ATCAY, caytaxin
AC006132.1	uncharacterized protein LOC100287177			IRF1	interferon regulatory factor 1					ARL10	ADP ribosylation factor like GTPase 10					ATG3	activating transcription factor 7
AC006455.1				IRF4	interferon regulatory factor 4					ARMC8	armadillo repeat containing 8					ATP1B2	ATPase Na+/K+ transporting subunit beta 2
AC007040.11				IRG1	immunoresponsive 1 homolog (mouse)					ARPIN-AP3S2	ARPIN-AP3S2 readthrough					ATP6V0E2	ATPase H+ transporting V0 subunit e2
AC007375.1	Uncharacterized protein; cDNA FLJ43210 fis, clone FEBRA2020582			IRGQ	immunity-related GTPase family, Q					ASCC2	activating signal cointegrator 1 complex subunit 2					ATP6V1F	ATPase H+ transporting V1 subunit F
AC007390.5	HCG1988162; Uncharacterized protein			IRS1	insulin receptor substrate 1					ASCL2	achaete-scute family bHLH transcription factor 2					ATPAF2	ATP synthase mitochondrial F1 complex assembly factor 2
AC007461.1	Uncharacterized protein			IRX5	iroquois homeobox 5					ATAT1	alpha tubulin acetyltransferase 1					B4GALT5	beta-1,4-galactosyltransferase 5
AC008132.1	Uncharacterized protein			ISCA2	iron-sulfur cluster assembly 2					ATCAY	ATCAY, caytaxin					BCAP29	B cell receptor associated protein 29
AC008443.1	CDNA: FLJ23158 fis, clone LNG09623; Uncharacterized protein			ISLR	immunoglobulin superfamily containing leucine-rich repeat					ATF7	activating transcription factor 7					BEST3	bestrophin 3
AC010327.2	Uncharacterized protein; cDNA FLJ45856 fis, clone OCBBF2025631			ISX	intestine-specific homeobox					ATG3	autophagy related 3					BICC1	BicC family RNA binding protein 1
AC010441.1				ISY1	ISY1 splicing factor homolog (S. cerevisiae)					ATP1B2	ATPase Na+/K+ transporting subunit beta 2					BTF3L4	basic transcription factor 3 like 4
AC012215.1	Uncharacterized protein			ISY1-RAB43	ISY1-RAB43 readthrough					ATP2B1	ATPase plasma membrane Ca2+ transporting 1					BTN3A2	butyrophilin subfamily 3 member A2
AC013269.5	Uncharacterized protein			ISYNA1	inositol-3-phosphate synthase 1					ATP6V0E2	ATPase H+ transporting V0 subunit e2					C10orf105	chromosome 10 open reading frame 105
AC016559.1	Uncharacterized protein			ITCH	itchy E3 ubiquitin protein ligase					ATP6V1F	ATPase H+ transporting V1 subunit F					C12orf49	chromosome 12 open reading frame 49
AC016722.1	Uncharacterized protein			ITFG3	Protein ITFG3; Uncharacterized protein; cDNA FLJ60496					ATPAF2	ATP synthase mitochondrial F1 complex assembly factor 2					C17orf100	chromosome 17 open reading frame 100
AC020907.1	Uncharacterized protein			ITGA11	integrin, alpha 11					B4GALT5	beta-1,4-galactosyltransferase 5					C1QTNF1	C1q and TNF related 1
AC022498.1	Uncharacterized protein			ITGA3	integrin, alpha 3 (antigen CD49C, alpha 3 subunit of VLA-3 receptor)					B4GAT1	beta-1,4-glucuronyltransferase 1					C22orf24	chromosome 22 open reading frame 24
AC022532.1	Uncharacterized protein			ITGA9	integrin, alpha 9					BCAP29	B cell receptor associated protein 29					C22orf46	chromosome 22 open reading frame 46
AC074091.13	Uncharacterized protein			ITGB3	integrin, beta 3 (platelet glycoprotein IIIa, antigen CD61)					BEST3	bestrophin 3					C2orf81	chromosome 2 open reading frame 81
AC079354.1	uncharacterized protein KIAA2012			ITGB4	integrin, beta 4					BICC1	BicC family RNA binding protein 1					C9orf66	chromosome 9 open reading frame 66
AC079602.1				ITGB8	integrin, beta 8					BRWD1	bromodomain and WD repeat domain containing 1					CACNA1C	calcium voltage-gated channel subunit alpha1 C
AC093802.1	Uncharacterized protein			ITGBL1	integrin, beta-like 1 (with EGF-like repeat domains)					BTF3L4	basic transcription factor 3 like 4					CAMK1D	calcium/calmodulin dependent protein kinase ID
AC110619.2	Uncharacterized protein			ITIH3	inter-alpha-trypsin inhibitor heavy chain 3					BTN3A2	butyrophilin subfamily 3 member A2					CAPZB	capping actin protein of muscle Z-line subunit beta
AC124890.1	HCG1774533, isoform CRA_a; PRO2268; Uncharacterized protein			ITK	IL2-inducible T-cell kinase					C10orf105	chromosome 10 open reading frame 105					CASZ1	castor zinc finger 1
AC127496.1	Uncharacterized protein			ITM2B	integral membrane protein 2B					C12orf49	chromosome 12 open reading frame 49					CBFA2T2	CBFA2/RUNX1 translocation partner 2
AC135178.1	HCG1985372; Uncharacterized protein; cDNA FLJ37541 fis, clone BRCAN2026340			ITPA	inosine triphosphatase (nucleoside triphosphate pyrophosphatase)					C17orf100	chromosome 17 open reading frame 100					CBLN4	cerebellin 4 precursor
AC137932.1				ITPK1	inositol-tetrakisphosphate 1-kinase					C1QTNF1	C1q and TNF related 1					CBX6	chromobox 6
AC174470.1				ITPKB	inositol-trisphosphate 3-kinase B					C22orf24	chromosome 22 open reading frame 24					CCDC69	coiled-coil domain containing 69
ACACA	acetyl-CoA carboxylase alpha			ITPKC	inositol-trisphosphate 3-kinase C					C22orf46	chromosome 22 open reading frame 46					CCDC85C	coiled-coil domain containing 85C
ACAD11	acyl-CoA dehydrogenase family, member 11			ITPR3	inositol 1,4,5-trisphosphate receptor, type 3					C2orf81	chromosome 2 open reading frame 81					CCDC97	coiled-coil domain containing 97
ACAD8	acyl-CoA dehydrogenase family, member 8			ITPRIP	inositol 1,4,5-trisphosphate receptor interacting protein					C9orf66	chromosome 9 open reading frame 66					CCNF	cyclin F
ACAD9	acyl-CoA dehydrogenase family, member 9			ITPRIPL2	inositol 1,4,5-trisphosphate receptor interacting protein-like 2					CACNA1C	calcium voltage-gated channel subunit alpha1 C					CCNT1	cyclin T1
ACAP3	ArfGAP with coiled-coil, ankyrin repeat and PH domains 3			ITSN1	intersectin 1 (SH3 domain protein)					CAMK1D	calcium/calmodulin dependent protein kinase ID					CCSER2	coiled-coil serine rich protein 2
ACCS	1-aminocyclopropane-1-carboxylate synthase homolog (Arabidopsis)(non-functional)			IVL	involucrin					CAPZB	capping actin protein of muscle Z-line subunit beta					CD300LG	CD300 molecule like family member g
ACER2	alkaline ceramidase 2			IYD	iodotyrosine deiodinase					CASTOR2	cytosolic arginine sensor for mTORC1 subunit 2					CD40LG	CD40 ligand
ACKR2	atypical chemokine receptor 2			JAK3	Janus kinase 3					CASZ1	castor zinc finger 1					CD96	CD96 molecule
ACOT13	acyl-CoA thioesterase 13			JAKMIP2	janus kinase and microtubule interacting protein 2					CBFA2T2	CBFA2/RUNX1 translocation partner 2					CDAN1	codanin 1
ACOT2	acyl-CoA thioesterase 2			JAKMIP3	Janus kinase and microtubule interacting protein 3					CBLN4	cerebellin 4 precursor					CDCP2	CUB domain containing protein 2
ACOX1	acyl-CoA oxidase 1, palmitoyl			JAM3	junctional adhesion molecule 3					CBX6	chromobox 6					CEACAM19	carcinoembryonic antigen related cell adhesion molecule 19
ACSBG1	acyl-CoA synthetase bubblegum family member 1			JDP2	Jun dimerization protein 2					CCDC69	coiled-coil domain containing 69					CHKB	choline kinase beta
ACSBG2	acyl-CoA synthetase bubblegum family member 2			JMJD1C	jumonji domain containing 1C					CCDC85C	coiled-coil domain containing 85C					CIITA	class II major histocompatibility complex transactivator
ACSL1	acyl-CoA synthetase long-chain family member 1			JMJD7-PLA2G4B	JMJD7-PLA2G4B readthrough					CCDC97	coiled-coil domain containing 97					CKS1B	CDC28 protein kinase regulatory subunit 1B
ACSM4	acyl-CoA synthetase medium-chain family member 4			JMY	junction mediating and regulatory protein, p53 cofactor					CCN2	cellular communication network factor 2					CLDN11	claudin 11
ACSS2	acyl-CoA synthetase short-chain family member 2			JPH2	junctophilin 2					CCNF	cyclin F					CLDN12	claudin 12
ACSS3	acyl-CoA synthetase short-chain family member 3			JPH3	junctophilin 3					CCNT1	cyclin T1					CLDN23	claudin 23
ACTG1	actin, gamma 1			JUND	jun D proto-oncogene					CCSER2	coiled-coil serine rich protein 2					CNDP2	carnosine dipeptidase 2
ACTR3	ARP3 actin-related protein 3 homolog (yeast)			JUP	junction plakoglobin					CD1A	CD1a molecule					CNKSR3	CNKSR family member 3
ACTR8	ARP8 actin-related protein 8 homolog (yeast)			KAL1	Kallmann syndrome 1 sequence					CD300LG	CD300 molecule like family member g					CNTD1	cyclin N-terminal domain containing 1
ACVR2B	activin A receptor, type IIB			KANSL1	KAT8 regulatory NSL complex subunit 1					CD40LG	CD40 ligand					COL12A1	collagen type XII alpha 1 chain
ADAM19	ADAM metallopeptidase domain 19			KANSL1L	KAT8 regulatory NSL complex subunit 1-like					CD96	CD96 molecule					COQ10A	coenzyme Q10A
ADAM9	ADAM metallopeptidase domain 9			KAT7	K(lysine) acetyltransferase 7					CDAN1	codanin 1					CPD	carboxypeptidase D
ADAMTS17	ADAM metallopeptidase with thrombospondin type 1 motif, 17			KAT8	K(lysine) acetyltransferase 8					CDCP2	CUB domain containing protein 2					CPXM2	carboxypeptidase X, M14 family member 2
ADAMTS19	ADAM metallopeptidase with thrombospondin type 1 motif, 19			KATNB1	katanin p80 (WD repeat containing) subunit B 1					CEACAM19	carcinoembryonic antigen related cell adhesion molecule 19					CROT	carnitine O-octanoyltransferase
ADAMTS2	ADAM metallopeptidase with thrombospondin type 1 motif, 2			KAZALD1	Kazal-type serine peptidase inhibitor domain 1					CFAP47	cilia and flagella associated protein 47					CSF3	colony stimulating factor 3
ADAMTSL2	ADAMTS-like 2			KBTBD11	kelch repeat and BTB (POZ) domain containing 11					CHKB	choline kinase beta					CTCF	CCCTC-binding factor
ADAMTSL4	ADAMTS-like 4			KBTBD12	kelch repeat and BTB (POZ) domain containing 12					CIITA	class II major histocompatibility complex transactivator					CTDNEP1	CTD nuclear envelope phosphatase 1
ADAMTSL5	ADAMTS-like 5			KCMF1	potassium channel modulatory factor 1					CKS1B	CDC28 protein kinase regulatory subunit 1B					CXADR	CXADR, Ig-like cell adhesion molecule
ADARB2	adenosine deaminase, RNA-specific, B2 (non-functional)			KCNA6	potassium voltage-gated channel, shaker-related subfamily, member 6					CLDN11	claudin 11					CXCR2	C-X-C motif chemokine receptor 2
ADAT2	adenosine deaminase, tRNA-specific 2			KCNA7	potassium voltage-gated channel, shaker-related subfamily, member 7					CLDN12	claudin 12					CYP11B1	cytochrome P450 family 11 subfamily B member 1
ADCK2	aarF domain containing kinase 2			KCNAB2	potassium voltage-gated channel, shaker-related subfamily, beta member 2					CLDN23	claudin 23					CYTH3	cytohesin 3
ADCY2	adenylate cyclase 2 (brain)			KCNB1	potassium voltage-gated channel, Shab-related subfamily, member 1					CNDP2	carnosine dipeptidase 2					DAB1	DAB1, reelin adaptor protein
ADCY6	adenylate cyclase 6			KCNC1	potassium voltage-gated channel, Shaw-related subfamily, member 1					CNKSR3	CNKSR family member 3					DAG1	dystroglycan 1
ADCYAP1R1	adenylate cyclase activating polypeptide 1 (pituitary) receptor type I			KCNC3	potassium voltage-gated channel, Shaw-related subfamily, member 3					CNTD1	cyclin N-terminal domain containing 1					DDN	dendrin
ADD1	adducin 1 (alpha)			KCND3	potassium voltage-gated channel, Shal-related subfamily, member 3					COL12A1	collagen type XII alpha 1 chain					DDX18	DEAD-box helicase 18
ADD2	adducin 2 (beta)			KCNG1	potassium voltage-gated channel, subfamily G, member 1					COQ10A	coenzyme Q10A					DERL3	derlin 3
ADH1B	alcohol dehydrogenase 1B (class I), beta polypeptide			KCNH1	potassium voltage-gated channel, subfamily H (eag-related), member 1					CPD	carboxypeptidase D					DFFA	DNA fragmentation factor subunit alpha
ADH5	alcohol dehydrogenase 5 (class III), chi polypeptide			KCNH6	potassium voltage-gated channel, subfamily H (eag-related), member 6					CPXM2	carboxypeptidase X, M14 family member 2					DHCR7	7-dehydrocholesterol reductase
ADH6	alcohol dehydrogenase 6 (class V)			KCNH8	potassium voltage-gated channel, subfamily H (eag-related), member 8					CROT	carnitine O-octanoyltransferase					DHX33	DEAH-box helicase 33
ADHFE1	alcohol dehydrogenase, iron containing, 1			KCNIP3	Kv channel interacting protein 3, calsenilin					CSF3	colony stimulating factor 3					DNAJB2	DnaJ heat shock protein family (Hsp40) member B2
ADIPOQ	adiponectin, C1Q and collagen domain containing			KCNJ10	potassium inwardly-rectifying channel, subfamily J, member 10					CSKMT	citrate synthase lysine methyltransferase					DNM1	dynamin 1
ADIPOR2	adiponectin receptor 2			KCNJ11	potassium inwardly-rectifying channel, subfamily J, member 11					CTCF	CCCTC-binding factor					DOK6	docking protein 6
ADM	adrenomedullin			KCNJ12	potassium inwardly-rectifying channel, subfamily J, member 12					CTDNEP1	CTD nuclear envelope phosphatase 1					DPF2	double PHD fingers 2
ADM2	adrenomedullin 2			KCNJ16	potassium inwardly-rectifying channel, subfamily J, member 16					CUX1	cut like homeobox 1					DPP8	dipeptidyl peptidase 8
ADORA1	adenosine A1 receptor			KCNJ4	potassium inwardly-rectifying channel, subfamily J, member 4					CXADR	CXADR, Ig-like cell adhesion molecule					DPYSL3	dihydropyrimidinase like 3
ADORA2A	adenosine A2a receptor			KCNJ6	potassium inwardly-rectifying channel, subfamily J, member 6					CXCR2	C-X-C motif chemokine receptor 2					DUSP3	dual specificity phosphatase 3
ADORA3	adenosine A3 receptor			KCNK1	potassium channel, subfamily K, member 1					CYP11B1	cytochrome P450 family 11 subfamily B member 1					DVL3	dishevelled segment polarity protein 3
ADPGK	ADP-dependent glucokinase			KCNK12	potassium channel, subfamily K, member 12					CYTH3	cytohesin 3					E2F1	E2F transcription factor 1
ADRA2B	adrenoceptor alpha 2B			KCNK13	potassium channel, subfamily K, member 13					DAB1	DAB1, reelin adaptor protein					EARS2	glutamyl-tRNA synthetase 2, mitochondrial
ADRB1	adrenoceptor beta 1			KCNK3	potassium channel, subfamily K, member 3					DAG1	dystroglycan 1					EBI3	Epstein-Barr virus induced 3
ADSL	adenylosuccinate lyase			KCNK5	potassium channel, subfamily K, member 5					DDN	dendrin					EDC3	enhancer of mRNA decapping 3
AF196779.12	Uncharacterized protein; WD repeat domain phosphoinositide-interacting protein 4			KCNK6	potassium channel, subfamily K, member 6					DDX18	DEAD-box helicase 18					EFNA1	ephrin A1
AFAP1	actin filament associated protein 1			KCNMB1	potassium large conductance calcium-activated channel, subfamily M, beta member 1					DERL3	derlin 3					EFR3B	EFR3 homolog B
AFAP1L1	actin filament associated protein 1-like 1			KCNMB4	potassium large conductance calcium-activated channel, subfamily M, beta member 4					DFFA	DNA fragmentation factor subunit alpha					EIF2AK4	eukaryotic translation initiation factor 2 alpha kinase 4
AFF1	AF4/FMR2 family, member 1			KCNN3	potassium intermediate/small conductance calcium-activated channel, subfamily N, member 3					DHCR7	7-dehydrocholesterol reductase					EIF4E1B	eukaryotic translation initiation factor 4E family member 1B
AFF2	AF4/FMR2 family, member 2			KCNQ1	potassium voltage-gated channel, KQT-like subfamily, member 1					DHX33	DEAH-box helicase 33					ELAVL2	ELAV like RNA binding protein 2
AFF3	AF4/FMR2 family, member 3			KCNS1	potassium voltage-gated channel, delayed-rectifier, subfamily S, member 1					DIPK2B	divergent protein kinase domain 2B					ELK4	ELK4, ETS transcription factor
AFG3L2	AFG3 ATPase family member 3-like 2 (S. cerevisiae)			KCNT1	potassium channel, subfamily T, member 1					DNAJB2	DnaJ heat shock protein family (Hsp40) member B2					ELL3	elongation factor for RNA polymerase II 3
AGAP1	ArfGAP with GTPase domain, ankyrin repeat and PH domain 1			KCTD12	potassium channel tetramerization domain containing 12					DNM1	dynamin 1					EMB	embigin
AGBL5	ATP/GTP binding protein-like 5			KCTD14	potassium channel tetramerization domain containing 14					DOK6	docking protein 6					ENO1	enolase 1
AGGF1	angiogenic factor with G patch and FHA domains 1			KCTD15	potassium channel tetramerization domain containing 15					DPEP2NB	DPEP2 neighbor					ENTPD1	ectonucleoside triphosphate diphosphohydrolase 1
AGMAT	agmatine ureohydrolase (agmatinase)			KCTD2	potassium channel tetramerization domain containing 2					DPF2	double PHD fingers 2					ENTPD7	ectonucleoside triphosphate diphosphohydrolase 7
AGO1	argonaute RISC catalytic component 1			KCTD7	potassium channel tetramerization domain containing 7					DPP8	dipeptidyl peptidase 8					EPHA4	EPH receptor A4
AGO3	argonaute RISC catalytic component 3			KDM2A	lysine (K)-specific demethylase 2A					DPYSL3	dihydropyrimidinase like 3					EPX	eosinophil peroxidase
AGO4	argonaute RISC catalytic component 4			KDM4B	lysine (K)-specific demethylase 4B					DUSP3	dual specificity phosphatase 3					ESRP2	epithelial splicing regulatory protein 2
AGPAT4	1-acylglycerol-3-phosphate O-acyltransferase 4			KDM5A	lysine (K)-specific demethylase 5A					DVL3	dishevelled segment polarity protein 3					ETNK1	ethanolamine kinase 1
AGPAT6	1-acylglycerol-3-phosphate O-acyltransferase 6			KDSR	3-ketodihydrosphingosine reductase					E2F1	E2F transcription factor 1					ETNK2	ethanolamine kinase 2
AGPS	alkylglycerone phosphate synthase			KHDRBS3	KH domain containing, RNA binding, signal transduction associated 3					EARS2	glutamyl-tRNA synthetase 2, mitochondrial					ETV7	ETS variant 7
AGRN	agrin			KHK	ketohexokinase (fructokinase)					EBI3	Epstein-Barr virus induced 3					EXTL1	exostosin like glycosyltransferase 1
AGTRAP	angiotensin II receptor-associated protein			KIAA0087	KIAA0087					EDC3	enhancer of mRNA decapping 3					FAM162B	family with sequence similarity 162 member B
AGXT	alanine-glyoxylate aminotransferase			KIAA0101	KIAA0101					EFNA1	ephrin A1					FAM92B	family with sequence similarity 92 member B
AHR	aryl hydrocarbon receptor			KIAA0141	KIAA0141					EFR3B	EFR3 homolog B					FBXO32	F-box protein 32
AHSA2	AHA1, activator of heat shock 90kDa protein ATPase homolog 2 (yeast)			KIAA0195	KIAA0195					EIF2AK4	eukaryotic translation initiation factor 2 alpha kinase 4					FCGRT	Fc fragment of IgG receptor and transporter
AIDA	axin interactor, dorsalization associated			KIAA0391	KIAA0391					EIF4E1B	eukaryotic translation initiation factor 4E family member 1B					FN3KRP	fructosamine 3 kinase related protein
AIFM1	apoptosis-inducing factor, mitochondrion-associated, 1			KIAA0408	KIAA0408					ELAVL2	ELAV like RNA binding protein 2					FNDC3A	fibronectin type III domain containing 3A
AIFM2	apoptosis-inducing factor, mitochondrion-associated, 2			KIAA0513	KIAA0513					ELK4	ELK4, ETS transcription factor					FNDC4	fibronectin type III domain containing 4
AIG1	androgen-induced 1			KIAA0556	KIAA0556					ELL3	elongation factor for RNA polymerase II 3					FRMPD4	FERM and PDZ domain containing 4
AIM1	absent in melanoma 1			KIAA0930	KIAA0930					ELOA	elongin A					FTO	FTO, alpha-ketoglutarate dependent dioxygenase
AIRE	autoimmune regulator			KIAA1147	KIAA1147					EMB	embigin					FUT4	fucosyltransferase 4
AJAP1	adherens junctions associated protein 1			KIAA1191	KIAA1191					ENO1	enolase 1					FUT5	fucosyltransferase 5
AK1	adenylate kinase 1			KIAA1211	KIAA1211					ENTPD1	ectonucleoside triphosphate diphosphohydrolase 1					FUT6	fucosyltransferase 6
AK2	adenylate kinase 2			KIAA1211L	KIAA1211-like					ENTPD7	ectonucleoside triphosphate diphosphohydrolase 7					FXYD3	FXYD domain containing ion transport regulator 3
AKAP12	A kinase (PRKA) anchor protein 12			KIAA1217	KIAA1217					EPHA4	EPH receptor A4					GABBR2	gamma-aminobutyric acid type B receptor subunit 2
AKAP17A	A kinase (PRKA) anchor protein 17A			KIAA1257	KIAA1257					EPX	eosinophil peroxidase					GABRB2	gamma-aminobutyric acid type A receptor beta2 subunit
AKAP6	A kinase (PRKA) anchor protein 6			KIAA1324	KIAA1324					ESRP2	epithelial splicing regulatory protein 2					GALM	galactose mutarotase
AKAP8	A kinase (PRKA) anchor protein 8			KIAA1377	KIAA1377					ETNK1	ethanolamine kinase 1					GALNT4	polypeptide N-acetylgalactosaminyltransferase 4
AKNA	AT-hook transcription factor			KIAA1462	KIAA1462					ETNK2	ethanolamine kinase 2					GDI2	GDP dissociation inhibitor 2
AKR7A2	aldo-keto reductase family 7, member A2 (aflatoxin aldehyde reductase)			KIAA1522	KIAA1522					ETV7	ETS variant 7					GDNF	glial cell derived neurotrophic factor
AKT1	v-akt murine thymoma viral oncogene homolog 1			KIAA1549L	KIAA1549-like					EXTL1	exostosin like glycosyltransferase 1					GJA4	gap junction protein alpha 4
AKT2	v-akt murine thymoma viral oncogene homolog 2			KIAA1551	KIAA1551					FAM162B	family with sequence similarity 162 member B					GJB2	gap junction protein beta 2
AL020996.1	Uncharacterized protein			KIAA1614	KIAA1614					FAM92B	family with sequence similarity 92 member B					GLIS3	GLIS family zinc finger 3
AL117190.3	Esophagus cancer-related gene-2 interaction susceptibility protein; Uncharacterized protein			KIAA1644	KIAA1644					FBXO32	F-box protein 32					GNAI2	G protein subunit alpha i2
AL161915.1	Uncharacterized protein			KIAA1671	KIAA1671					FCGRT	Fc fragment of IgG receptor and transporter					GNAL	G protein subunit alpha L
AL353791.1				KIAA1715	KIAA1715					FN3KRP	fructosamine 3 kinase related protein					GNG3	G protein subunit gamma 3
AL355390.1	Uncharacterized protein			KIAA2018	KIAA2018					FNBP1	formin binding protein 1					GNPDA1	glucosamine-6-phosphate deaminase 1
AL356356.1	Protein LOC100996516			KIF1A	kinesin family member 1A					FNDC3A	fibronectin type III domain containing 3A					GNRHR	gonadotropin releasing hormone receptor
AL359878.1	Uncharacterized protein			KIF1C	kinesin family member 1C					FNDC4	fibronectin type III domain containing 4					GOLGA7B	golgin A7 family member B
AL953854.2				KIF21B	kinesin family member 21B					FRMPD4	FERM and PDZ domain containing 4					GOPC	golgi associated PDZ and coiled-coil motif containing
ALDH16A1	aldehyde dehydrogenase 16 family, member A1			KIF24	kinesin family member 24					FTO	FTO, alpha-ketoglutarate dependent dioxygenase					GPI	glucose-6-phosphate isomerase
ALDH1L2	aldehyde dehydrogenase 1 family, member L2			KIF26B	kinesin family member 26B					FUT4	fucosyltransferase 4					GPR155	G protein-coupled receptor 155
ALDH3B2	aldehyde dehydrogenase 3 family, member B2			KIF3B	kinesin family member 3B					FUT5	fucosyltransferase 5					GPR55	G protein-coupled receptor 55
ALDOA	aldolase A, fructose-bisphosphate			KIF3C	kinesin family member 3C					FUT6	fucosyltransferase 6					GRIN3A	glutamate ionotropic receptor NMDA type subunit 3A
ALG1	ALG1, chitobiosyldiphosphodolichol beta-mannosyltransferase			KIF5C	kinesin family member 5C					FXYD3	FXYD domain containing ion transport regulator 3					GRK5	G protein-coupled receptor kinase 5
ALG12	ALG12, alpha-1,6-mannosyltransferase			KIF6	kinesin family member 6					GABBR2	gamma-aminobutyric acid type B receptor subunit 2					GRM4	glutamate metabotropic receptor 4
ALG14	ALG14, UDP-N-acetylglucosaminyltransferase subunit			KIFC3	kinesin family member C3					GABRB2	gamma-aminobutyric acid type A receptor beta2 subunit					H2AFX	H2A histone family member X
ALG9	ALG9, alpha-1,2-mannosyltransferase			KIRREL	kin of IRRE like (Drosophila)					GALM	galactose mutarotase					H2AFY2	H2A histone family member Y2
ALKBH4	alkB, alkylation repair homolog 4 (E. coli)			KIRREL3	kin of IRRE like 3 (Drosophila)					GALNT4	polypeptide N-acetylgalactosaminyltransferase 4					HDAC1	histone deacetylase 1
ALKBH5	alkB, alkylation repair homolog 5 (E. coli)			KITLG	KIT ligand					GDI2	GDP dissociation inhibitor 2					HDDC2	HD domain containing 2
ALOX15	arachidonate 15-lipoxygenase			KLB	klotho beta					GDNF	glial cell derived neurotrophic factor					HHAT	hedgehog acyltransferase
ALOX15B	arachidonate 15-lipoxygenase, type B			KLF1	Kruppel-like factor 1 (erythroid)					GJA4	gap junction protein alpha 4					HIC2	HIC ZBTB transcriptional repressor 2
ALPI	alkaline phosphatase, intestinal			KLF10	Kruppel-like factor 10					GJB2	gap junction protein beta 2					HIF1AN	hypoxia inducible factor 1 subunit alpha inhibitor
ALPK1	alpha-kinase 1			KLF12	Kruppel-like factor 12					GLIS3	GLIS family zinc finger 3					HOXB6	homeobox B6
ALPK3	alpha-kinase 3			KLF13	Kruppel-like factor 13					GNAI2	G protein subunit alpha i2					HOXC4	homeobox C4
ALS2CL	ALS2 C-terminal like			KLF15	Kruppel-like factor 15					GNAL	G protein subunit alpha L					HRH1	histamine receptor H1
ALX1	ALX homeobox 1			KLF16	Kruppel-like factor 16					GNAO1	G protein subunit alpha o1					HSD11B2	hydroxysteroid 11-beta dehydrogenase 2
ALX4	ALX homeobox 4			KLF17	Kruppel-like factor 17					GNG3	G protein subunit gamma 3					HTR1E	5-hydroxytryptamine receptor 1E
AMBRA1	autophagy/beclin-1 regulator 1			KLF2	Kruppel-like factor 2 (lung)					GNPDA1	glucosamine-6-phosphate deaminase 1					HTT	huntingtin
AMER2	APC membrane recruitment protein 2			KLF3	Kruppel-like factor 3 (basic)					GNRHR	gonadotropin releasing hormone receptor					HYOU1	hypoxia up-regulated 1
AMER3	APC membrane recruitment protein 3			KLF6	Kruppel-like factor 6					GOLGA7B	golgin A7 family member B					IBA57	IBA57, iron-sulfur cluster assembly
AMFR	autocrine motility factor receptor, E3 ubiquitin protein ligase			KLF7	Kruppel-like factor 7 (ubiquitous)					GOPC	golgi associated PDZ and coiled-coil motif containing					ICA1L	islet cell autoantigen 1 like
AMIGO1	adhesion molecule with Ig-like domain 1			KLF9	Kruppel-like factor 9					GPI	glucose-6-phosphate isomerase					IFNLR1	interferon lambda receptor 1
AMIGO3	adhesion molecule with Ig-like domain 3			KLHDC3	kelch domain containing 3					GPR155	G protein-coupled receptor 155					IGF2BP2	insulin like growth factor 2 mRNA binding protein 2
AMOTL1	angiomotin like 1			KLHDC7A	kelch domain containing 7A					GPR55	G protein-coupled receptor 55					IGF2BP3	insulin like growth factor 2 mRNA binding protein 3
AMOTL2	angiomotin like 2			KLHDC8A	kelch domain containing 8A					GRIA3	glutamate ionotropic receptor AMPA type subunit 3					IGHMBP2	immunoglobulin mu DNA binding protein 2
AMZ1	archaelysin family metallopeptidase 1			KLHL21	kelch-like family member 21					GRIN3A	glutamate ionotropic receptor NMDA type subunit 3A					IL10RA	interleukin 10 receptor subunit alpha
ANG	angiogenin, ribonuclease, RNase A family, 5			KLHL23	kelch-like family member 23					GRK5	G protein-coupled receptor kinase 5					IL12RB1	interleukin 12 receptor subunit beta 1
ANGEL2	angel homolog 2 (Drosophila)			KLHL26	kelch-like family member 26					GRM4	glutamate metabotropic receptor 4					IL5RA	interleukin 5 receptor subunit alpha
ANGPT4	angiopoietin 4			KLHL3	kelch-like family member 3					H2AFX	H2A histone family member X					ILDR2	immunoglobulin like domain containing receptor 2
ANGPTL2	angiopoietin-like 2			KLHL30	kelch-like family member 30					H2AFY2	H2A histone family member Y2					INSR	insulin receptor
ANK1	ankyrin 1, erythrocytic			KLHL31	kelch-like family member 31					HDAC1	histone deacetylase 1					IRGQ	immunity related GTPase Q
ANK2	ankyrin 2, neuronal			KLHL4	kelch-like family member 4					HDDC2	HD domain containing 2					ISX	intestine specific homeobox
ANK3	ankyrin 3, node of Ranvier (ankyrin G)			KLHL6	kelch-like family member 6					HHAT	hedgehog acyltransferase					ITIH3	inter-alpha-trypsin inhibitor heavy chain 3
ANKDD1B	ankyrin repeat and death domain containing 1B			KLHL9	kelch-like family member 9					HIC2	HIC ZBTB transcriptional repressor 2					ITPA	inosine triphosphatase
ANKFY1	ankyrin repeat and FYVE domain containing 1			KLK2	kallikrein-related peptidase 2					HIF1AN	hypoxia inducible factor 1 subunit alpha inhibitor					IYD	iodotyrosine deiodinase
ANKHD1-EIF4EBP3	ANKHD1-EIF4EBP3 readthrough			KLK3	kallikrein-related peptidase 3					HOXB6	homeobox B6					JAKMIP2	janus kinase and microtubule interacting protein 2
ANKRD11	ankyrin repeat domain 11			KLK9	kallikrein-related peptidase 9					HOXC4	homeobox C4					JAKMIP3	Janus kinase and microtubule interacting protein 3
ANKRD12	ankyrin repeat domain 12			KLRF1	killer cell lectin-like receptor subfamily F, member 1					HRH1	histamine receptor H1					KATNB1	katanin regulatory subunit B1
ANKRD13A	ankyrin repeat domain 13A			KNOP1	lysine-rich nucleolar protein 1					HSD11B2	hydroxysteroid 11-beta dehydrogenase 2					KCNA6	potassium voltage-gated channel subfamily A member 6
ANKRD33B	ankyrin repeat domain 33B			KNSTRN	kinetochore-localized astrin/SPAG5 binding protein					HTR1E	5-hydroxytryptamine receptor 1E					KCNAB2	potassium voltage-gated channel subfamily A regulatory beta subunit 2
ANKRD34A	ankyrin repeat domain 34A			KPNA3	karyopherin alpha 3 (importin alpha 4)					HTT	huntingtin					KCNH6	potassium voltage-gated channel subfamily H member 6
ANKRD45	ankyrin repeat domain 45			KPRP	keratinocyte proline-rich protein					HYDIN	HYDIN, axonemal central pair apparatus protein					KCNJ4	potassium voltage-gated channel subfamily J member 4
ANKRD6	ankyrin repeat domain 6			KRBA1	KRAB-A domain containing 1					HYOU1	hypoxia up-regulated 1					KCNN3	potassium calcium-activated channel subfamily N member 3
ANKRD9	ankyrin repeat domain 9			KRIT1	KRIT1, ankyrin repeat containing					IBA57	IBA57, iron-sulfur cluster assembly					KCTD7	potassium channel tetramerization domain containing 7
ANKS6	ankyrin repeat and sterile alpha motif domain containing 6			KRT17	keratin 17					ICA1L	islet cell autoantigen 1 like					KIAA1191	KIAA1191
ANLN	anillin, actin binding protein			KRT7	keratin 7					IFNLR1	interferon lambda receptor 1					KIF3C	kinesin family member 3C
ANO10	anoctamin 10			KRT77	keratin 77					IGF2BP2	insulin like growth factor 2 mRNA binding protein 2					KLF6	Kruppel like factor 6
ANP32B	acidic (leucine-rich) nuclear phosphoprotein 32 family, member B			KRT78	keratin 78					IGF2BP3	insulin like growth factor 2 mRNA binding protein 3					KLF7	Kruppel like factor 7
ANP32E	acidic (leucine-rich) nuclear phosphoprotein 32 family, member E			KRT80	keratin 80					IGHMBP2	immunoglobulin mu DNA binding protein 2					KLHDC3	kelch domain containing 3
ANXA11	annexin A11			KRT9	keratin 9					IL10RA	interleukin 10 receptor subunit alpha					KNSTRN	kinetochore localized astrin (SPAG5) binding protein
ANXA13	annexin A13			KRTAP10-1	keratin associated protein 10-1					IL12RB1	interleukin 12 receptor subunit beta 1					KPNA3	karyopherin subunit alpha 3
AOC1	amine oxidase, copper containing 1			KRTAP10-2	keratin associated protein 10-2					IL5RA	interleukin 5 receptor subunit alpha					KRT9	keratin 9
AOC3	amine oxidase, copper containing 3			KRTAP10-9	keratin associated protein 10-9					ILDR2	immunoglobulin like domain containing receptor 2					KRTAP17-1	keratin associated protein 17-1
AP000867.1				KRTAP17-1	keratin associated protein 17-1					INSR	insulin receptor					LAPTM4B	lysosomal protein transmembrane 4 beta
AP001652.1	Uncharacterized protein; cDNA FLJ60524			KRTAP20-2	keratin associated protein 20-2					IRGQ	immunity related GTPase Q					LARS2	leucyl-tRNA synthetase 2, mitochondrial
AP003068.23	Uncharacterized protein			KRTAP24-1	keratin associated protein 24-1					ISX	intestine specific homeobox					LCOR	ligand dependent nuclear receptor corepressor
AP1M1	adaptor-related protein complex 1, mu 1 subunit			KRTAP9-6	keratin associated protein 9-6					ITIH3	inter-alpha-trypsin inhibitor heavy chain 3					LENEP	lens epithelial protein
AP1S3	adaptor-related protein complex 1, sigma 3 subunit			KSR1	kinase suppressor of ras 1					ITPA	inosine triphosphatase					LEPROT	leptin receptor overlapping transcript
AP2A2	adaptor-related protein complex 2, alpha 2 subunit			KSR2	kinase suppressor of ras 2					IYD	iodotyrosine deiodinase					LINGO4	leucine rich repeat and Ig domain containing 4
AP3B1	adaptor-related protein complex 3, beta 1 subunit			KY	kyphoscoliosis peptidase					JAKMIP2	janus kinase and microtubule interacting protein 2					LIPG	lipase G, endothelial type
AP3B2	adaptor-related protein complex 3, beta 2 subunit			L3MBTL2	l(3)mbt-like 2 (Drosophila)					JAKMIP3	Janus kinase and microtubule interacting protein 3					LMX1B	LIM homeobox transcription factor 1 beta
AP3S2	adaptor-related protein complex 3, sigma 2 subunit			L3MBTL4	l(3)mbt-like 4 (Drosophila)					JRK	Jrk helix-turn-helix protein					LRCH2	leucine rich repeats and calponin homology domain containing 2
AP4S1	adaptor-related protein complex 4, sigma 1 subunit			LAD1	ladinin 1					KATNB1	katanin regulatory subunit B1					LRP4	LDL receptor related protein 4
AP5B1	adaptor-related protein complex 5, beta 1 subunit			LAIR1	leukocyte-associated immunoglobulin-like receptor 1					KCNA6	potassium voltage-gated channel subfamily A member 6					LRP8	LDL receptor related protein 8
AP5S1	adaptor-related protein complex 5, sigma 1 subunit			LAMTOR1	late endosomal/lysosomal adaptor, MAPK and MTOR activator 1					KCNAB2	potassium voltage-gated channel subfamily A regulatory beta subunit 2					LRPPRC	leucine rich pentatricopeptide repeat containing
AP5Z1	adaptor-related protein complex 5, zeta 1 subunit			LANCL2	LanC lantibiotic synthetase component C-like 2 (bacterial)					KCNH6	potassium voltage-gated channel subfamily H member 6					LRRC1	leucine rich repeat containing 1
APAF1	apoptotic peptidase activating factor 1			LANCL3	LanC lantibiotic synthetase component C-like 3 (bacterial)					KCNJ4	potassium voltage-gated channel subfamily J member 4					LRRC6	leucine rich repeat containing 6
APBA1	amyloid beta (A4) precursor protein-binding, family A, member 1			LAPTM4B	lysosomal protein transmembrane 4 beta					KCNN3	potassium calcium-activated channel subfamily N member 3					LUC7L	LUC7 like
APH1A	APH1A gamma secretase subunit			LARP1	La ribonucleoprotein domain family, member 1					KCTD7	potassium channel tetramerization domain containing 7					LUZP1	leucine zipper protein 1
APLNR	apelin receptor			LARP4B	La ribonucleoprotein domain family, member 4B					KIAA1191	KIAA1191					LZIC	leucine zipper and CTNNBIP1 domain containing
APLP2	amyloid beta (A4) precursor-like protein 2			LARS2	leucyl-tRNA synthetase 2, mitochondrial					KIAA1328	KIAA1328					MAGEE1	MAGE family member E1
APOA5	apolipoprotein A-V			LAS1L	LAS1-like (S. cerevisiae)					KIF3C	kinesin family member 3C					MAGI3	membrane associated guanylate kinase, WW and PDZ domain containing 3
APOB	apolipoprotein B			LAT2	linker for activation of T cells family, member 2					KLF6	Kruppel like factor 6					MAP10	microtubule associated protein 10
APOBEC2	apolipoprotein B mRNA editing enzyme, catalytic polypeptide-like 2			LBP	lipopolysaccharide binding protein					KLF7	Kruppel like factor 7					MAP6D1	MAP6 domain containing 1
APOBEC3G	apolipoprotein B mRNA editing enzyme, catalytic polypeptide-like 3G			LCE1A	late cornified envelope 1A					KLHDC3	kelch domain containing 3					MAPT	microtubule associated protein tau
APOC3	apolipoprotein C-III			LCLAT1	lysocardiolipin acyltransferase 1					KNSTRN	kinetochore localized astrin (SPAG5) binding protein					MAZ	MYC associated zinc finger protein
APOE	apolipoprotein E			LCN15	lipocalin 15					KPNA3	karyopherin subunit alpha 3					MBD6	methyl-CpG binding domain protein 6
APOF	apolipoprotein F			LCN6	lipocalin 6					KRT9	keratin 9					MED20	mediator complex subunit 20
APOL3	apolipoprotein L, 3			LCOR	ligand dependent nuclear receptor corepressor					KRTAP17-1	keratin associated protein 17-1					MGST3	microsomal glutathione S-transferase 3
APOL6	apolipoprotein L, 6			LCP1	lymphocyte cytosolic protein 1 (L-plastin)					LAPTM4B	lysosomal protein transmembrane 4 beta					MIP	major intrinsic protein of lens fiber
APOLD1	apolipoprotein L domain containing 1			LDB3	LIM domain binding 3					LARS2	leucyl-tRNA synthetase 2, mitochondrial					MLX	MLX, MAX dimerization protein
APPBP2	amyloid beta precursor protein (cytoplasmic tail) binding protein 2			LDHAL6A	lactate dehydrogenase A-like 6A					LCOR	ligand dependent nuclear receptor corepressor					MMP15	matrix metallopeptidase 15
AQP10	aquaporin 10			LDLRAD3	low density lipoprotein receptor class A domain containing 3					LENEP	lens epithelial protein					MN1	MN1 proto-oncogene, transcriptional regulator
AQP11	aquaporin 11			LDLRAP1	low density lipoprotein receptor adaptor protein 1					LEPROT	leptin receptor overlapping transcript					MON1A	MON1 homolog A, secretory trafficking associated
AQR	aquarius intron-binding spliceosomal factor			LDOC1	leucine zipper, down-regulated in cancer 1					LINGO4	leucine rich repeat and Ig domain containing 4					MPZ	myelin protein zero
ARAP1	ArfGAP with RhoGAP domain, ankyrin repeat and PH domain 1			LEMD2	LEM domain containing 2					LIPG	lipase G, endothelial type					MR1	major histocompatibility complex, class I-related
ARC	activity-regulated cytoskeleton-associated protein			LENEP	lens epithelial protein					LMX1B	LIM homeobox transcription factor 1 beta					MRC2	mannose receptor C type 2
ARFGEF1	ADP-ribosylation factor guanine nucleotide-exchange factor 1 (brefeldin A-inhibited)			LEPREL1	leprecan-like 1					LOC101927503	uncharacterized LOC101927503					MRPL11	mitochondrial ribosomal protein L11
ARFIP2	ADP-ribosylation factor interacting protein 2			LEPROT	leptin receptor overlapping transcript					LOC101928841	collagen alpha-1(II) chain-like					MRPL22	mitochondrial ribosomal protein L22
ARHGAP17	Rho GTPase activating protein 17			LGI2	leucine-rich repeat LGI family, member 2					LRCH1	leucine rich repeats and calponin homology domain containing 1					MRPL46	mitochondrial ribosomal protein L46
ARHGAP18	Rho GTPase activating protein 18			LHFPL4	lipoma HMGIC fusion partner-like 4					LRCH2	leucine rich repeats and calponin homology domain containing 2					MRPS36	mitochondrial ribosomal protein S36
ARHGAP19-SLIT1	ARHGAP19-SLIT1 readthrough (NMD candidate)			LHX3	LIM homeobox 3					LRP4	LDL receptor related protein 4					MS4A4A	membrane spanning 4-domains A4A
ARHGAP25	Rho GTPase activating protein 25			LHX5	LIM homeobox 5					LRP8	LDL receptor related protein 8					MUC2	mucin 2, oligomeric mucus/gel-forming
ARHGAP27	Rho GTPase activating protein 27			LHX6	LIM homeobox 6					LRPPRC	leucine rich pentatricopeptide repeat containing					MUL1	mitochondrial E3 ubiquitin protein ligase 1
ARHGAP29	Rho GTPase activating protein 29			LIG3	ligase III, DNA, ATP-dependent					LRRC1	leucine rich repeat containing 1					NAV3	neuron navigator 3
ARHGAP31	Rho GTPase activating protein 31			LILRA1	leukocyte immunoglobulin-like receptor, subfamily A (with TM domain), member 1					LRRC6	leucine rich repeat containing 6					NCKIPSD	NCK interacting protein with SH3 domain
ARHGAP32	Rho GTPase activating protein 32			LILRA2	leukocyte immunoglobulin-like receptor, subfamily A (with TM domain), member 2					LRTOMT	leucine rich transmembrane and O-methyltransferase domain containing					NEK9	NIMA related kinase 9
ARHGDIA	Rho GDP dissociation inhibitor (GDI) alpha			LILRA6	leukocyte immunoglobulin-like receptor, subfamily A (with TM domain), member 6					LUC7L	LUC7 like					NFASC	neurofascin
ARHGEF1	Rho guanine nucleotide exchange factor (GEF) 1			LILRB2	leukocyte immunoglobulin-like receptor, subfamily B (with TM and ITIM domains), member 2					LUZP1	leucine zipper protein 1					NFATC4	nuclear factor of activated T cells 4
ARHGEF15	Rho guanine nucleotide exchange factor (GEF) 15			LILRB5	leukocyte immunoglobulin-like receptor, subfamily B (with TM and ITIM domains), member 5					LZIC	leucine zipper and CTNNBIP1 domain containing					NOD1	nucleotide binding oligomerization domain containing 1
ARHGEF7	Rho guanine nucleotide exchange factor (GEF) 7			LIMD1	LIM domains containing 1					MAGEE1	MAGE family member E1					NOS2	nitric oxide synthase 2
ARID2	AT rich interactive domain 2 (ARID, RFX-like)			LIMD2	LIM domain containing 2					MAGI3	membrane associated guanylate kinase, WW and PDZ domain containing 3					NPAS3	neuronal PAS domain protein 3
ARID3B	AT rich interactive domain 3B (BRIGHT-like)			LIMK1	LIM domain kinase 1					MAP10	microtubule associated protein 10					NPY1R	neuropeptide Y receptor Y1
ARL10	ADP-ribosylation factor-like 10			LIN7C	lin-7 homolog C (C. elegans)					MAP6D1	MAP6 domain containing 1					NR1D1	nuclear receptor subfamily 1 group D member 1
ARL14EP	ADP-ribosylation factor-like 14 effector protein			LINC00998	long intergenic non-protein coding RNA 998					MAPT	microtubule associated protein tau					NR4A3	nuclear receptor subfamily 4 group A member 3
ARL14EPL	ADP-ribosylation factor-like 14 effector protein-like			LINC00999	long intergenic non-protein coding RNA 999					MAZ	MYC associated zinc finger protein					NSUN5	NOP2/Sun RNA methyltransferase family member 5
ARL2BP	ADP-ribosylation factor-like 2 binding protein			LINGO4	leucine rich repeat and Ig domain containing 4					MBD6	methyl-CpG binding domain protein 6					NUDT3	nudix hydrolase 3
ARL5A	ADP-ribosylation factor-like 5A			LINS	lines homolog (Drosophila)					MED20	mediator complex subunit 20					NXF1	nuclear RNA export factor 1
ARL8B	ADP-ribosylation factor-like 8B			LIPG	lipase, endothelial					MGST3	microsomal glutathione S-transferase 3					NXPH3	neurexophilin 3
ARMC1	armadillo repeat containing 1			LIPH	lipase, member H					MIP	major intrinsic protein of lens fiber					OGT	O-linked N-acetylglucosamine (GlcNAc) transferase
ARMC5	armadillo repeat containing 5			LIPN	lipase, family member N					MLX	MLX, MAX dimerization protein					OLFML2A	olfactomedin like 2A
ARMC8	armadillo repeat containing 8			LIPT2	lipoyl(octanoyl) transferase 2 (putative)					MMP15	matrix metallopeptidase 15					ONECUT2	one cut homeobox 2
ARMCX5	armadillo repeat containing, X-linked 5			LIX1	Lix1 homolog (chicken)					MN1	MN1 proto-oncogene, transcriptional regulator					OPCML	opioid binding protein/cell adhesion molecule like
ARNT2	aryl-hydrocarbon receptor nuclear translocator 2			LL22NC03-63E9.3	Uncharacterized protein					MON1A	MON1 homolog A, secretory trafficking associated					OPN1MW	opsin 1, medium wave sensitive
ARNTL	aryl hydrocarbon receptor nuclear translocator-like			LLPH	LLP homolog, long-term synaptic facilitation (Aplysia)					MPZ	myelin protein zero					OPN4	opsin 4
ARNTL2	aryl hydrocarbon receptor nuclear translocator-like 2			LMAN2L	lectin, mannose-binding 2-like					MR1	major histocompatibility complex, class I-related					ORMDL3	ORMDL sphingolipid biosynthesis regulator 3
ARPC2	actin related protein 2/3 complex, subunit 2, 34kDa			LMBR1	limb development membrane protein 1					MRC2	mannose receptor C type 2					OSBP	oxysterol binding protein
ARPP19	cAMP-regulated phosphoprotein, 19kDa			LMCD1	LIM and cysteine-rich domains 1					MRPL11	mitochondrial ribosomal protein L11					OSBPL10	oxysterol binding protein like 10
ARRB1	arrestin, beta 1			LMF1	lipase maturation factor 1					MRPL22	mitochondrial ribosomal protein L22					OTOP3	otopetrin 3
ARRDC2	arrestin domain containing 2			LMF2	lipase maturation factor 2					MRPL46	mitochondrial ribosomal protein L46					PADI2	peptidyl arginine deiminase 2
ARSA	arylsulfatase A			LMNB2	lamin B2					MRPS36	mitochondrial ribosomal protein S36					PAK1	p21 (RAC1) activated kinase 1
ARSB	arylsulfatase B			LMOD2	leiomodin 2 (cardiac)					MS4A4A	membrane spanning 4-domains A4A					PBXIP1	PBX homeobox interacting protein 1
ARSD	arylsulfatase D			LMX1B	LIM homeobox transcription factor 1, beta					MST1L	macrophage stimulating 1 like					PCDHB6	protocadherin beta 6
ARSI	arylsulfatase family, member I			LOH12CR1	loss of heterozygosity, 12, chromosomal region 1					MUC2	mucin 2, oligomeric mucus/gel-forming					PCGF3	polycomb group ring finger 3
ARSK	arylsulfatase family, member K			LONRF2	LON peptidase N-terminal domain and ring finger 2					MUL1	mitochondrial E3 ubiquitin protein ligase 1					PEX12	peroxisomal biogenesis factor 12
AS3MT	arsenic (+3 oxidation state) methyltransferase			LONRF3	LON peptidase N-terminal domain and ring finger 3					NAV3	neuron navigator 3					PGS1	phosphatidylglycerophosphate synthase 1
ASAP1	ArfGAP with SH3 domain, ankyrin repeat and PH domain 1			LOXL3	lysyl oxidase-like 3					NCKIPSD	NCK interacting protein with SH3 domain					PHF23	PHD finger protein 23
ASB1	ankyrin repeat and SOCS box containing 1			LPAR2	lysophosphatidic acid receptor 2					NEK9	NIMA related kinase 9					PHKG2	phosphorylase kinase catalytic subunit gamma 2
ASB12	ankyrin repeat and SOCS box containing 12			LPCAT1	lysophosphatidylcholine acyltransferase 1					NFASC	neurofascin					PHTF2	putative homeodomain transcription factor 2
ASB13	ankyrin repeat and SOCS box containing 13			LPHN3	latrophilin 3					NFATC4	nuclear factor of activated T cells 4					PIEZO2	piezo type mechanosensitive ion channel component 2
ASB14	ankyrin repeat and SOCS box containing 14			LPIN3	lipin 3					NLRP1	NLR family pyrin domain containing 1					PIGS	phosphatidylinositol glycan anchor biosynthesis class S
ASB15	ankyrin repeat and SOCS box containing 15			LRCH2	leucine-rich repeats and calponin homology (CH) domain containing 2					NOD1	nucleotide binding oligomerization domain containing 1					PIP4K2B	phosphatidylinositol-5-phosphate 4-kinase type 2 beta
ASB16	ankyrin repeat and SOCS box containing 16			LRCH3	leucine-rich repeats and calponin homology (CH) domain containing 3					NOS2	nitric oxide synthase 2					PKMYT1	protein kinase, membrane associated tyrosine/threonine 1
ASB6	ankyrin repeat and SOCS box containing 6			LRFN4	leucine rich repeat and fibronectin type III domain containing 4					NPAS3	neuronal PAS domain protein 3					PLA2G4C	phospholipase A2 group IVC
ASCC1	activating signal cointegrator 1 complex subunit 1			LRP2	low density lipoprotein receptor-related protein 2					NPY1R	neuropeptide Y receptor Y1					PLEKHO2	pleckstrin homology domain containing O2
ASCC2	activating signal cointegrator 1 complex subunit 2			LRP2BP	LRP2 binding protein					NR1D1	nuclear receptor subfamily 1 group D member 1					PLIN3	perilipin 3
ASCL2	achaete-scute complex homolog 2 (Drosophila)			LRP3	low density lipoprotein receptor-related protein 3					NR4A3	nuclear receptor subfamily 4 group A member 3					PLXNA1	plexin A1
ASGR2	asialoglycoprotein receptor 2			LRP4	low density lipoprotein receptor-related protein 4					NSD2	nuclear receptor binding SET domain protein 2					PLXNA4	plexin A4
ASTN1	astrotactin 1			LRP8	low density lipoprotein receptor-related protein 8, apolipoprotein e receptor					NSUN5	NOP2/Sun RNA methyltransferase family member 5					PML	promyelocytic leukemia
ASTN2	astrotactin 2			LRPAP1	low density lipoprotein receptor-related protein associated protein 1					NUDT3	nudix hydrolase 3					POC1B-GALNT4	POC1B-GALNT4 readthrough
ATCAY	ataxia, cerebellar, Cayman type			LRPPRC	leucine-rich pentatricopeptide repeat containing					NXF1	nuclear RNA export factor 1					POLE	DNA polymerase epsilon, catalytic subunit
ATF2	activating transcription factor 2			LRRC1	leucine rich repeat containing 1					NXPH3	neurexophilin 3					POLR3A	RNA polymerase III subunit A
ATG13	autophagy related 13			LRRC14	leucine rich repeat containing 14					OAS1	2'-5'-oligoadenylate synthetase 1					POLR3D	RNA polymerase III subunit D
ATG2A	autophagy related 2A			LRRC27	leucine rich repeat containing 27					OGT	O-linked N-acetylglucosamine (GlcNAc) transferase					POPDC2	popeye domain containing 2
ATG2B	autophagy related 2B			LRRC28	leucine rich repeat containing 28					OLFML2A	olfactomedin like 2A					PPARA	peroxisome proliferator activated receptor alpha
ATG3	autophagy related 3			LRRC29	leucine rich repeat containing 29					ONECUT2	one cut homeobox 2					PPARGC1A	PPARG coactivator 1 alpha
ATG4D	autophagy related 4D, cysteine peptidase			LRRC3	leucine rich repeat containing 3					OPCML	opioid binding protein/cell adhesion molecule like					PPP1R12B	protein phosphatase 1 regulatory subunit 12B
ATG7	autophagy related 7			LRRC32	leucine rich repeat containing 32					OPN1MW	opsin 1, medium wave sensitive					PPP1R13B	protein phosphatase 1 regulatory subunit 13B
ATG9A	autophagy related 9A			LRRC3C	leucine rich repeat containing 3C					OPN4	opsin 4					PPP3R1	protein phosphatase 3 regulatory subunit B, alpha
ATG9B	autophagy related 9B			LRRC3DN	LRRC3 downstream neighbor (non-protein coding)					ORMDL3	ORMDL sphingolipid biosynthesis regulator 3					PRKAR2A	protein kinase cAMP-dependent type II regulatory subunit alpha
ATOH7	atonal homolog 7 (Drosophila)			LRRC40	leucine rich repeat containing 40					OSBP	oxysterol binding protein					PRKRIP1	PRKR interacting protein 1
ATOH8	atonal homolog 8 (Drosophila)			LRRC4B	leucine rich repeat containing 4B					OSBPL10	oxysterol binding protein like 10					PRMT3	protein arginine methyltransferase 3
ATP10A	ATPase, class V, type 10A			LRRC6	leucine rich repeat containing 6					OTOP3	otopetrin 3					PRR13	proline rich 13
ATP10D	ATPase, class V, type 10D			LRRC69	leucine rich repeat containing 69					PADI2	peptidyl arginine deiminase 2					PSAPL1	prosaposin like 1 (gene/pseudogene)
ATP11B	ATPase, class VI, type 11B			LRRD1	leucine-rich repeats and death domain containing 1					PAK1	p21 (RAC1) activated kinase 1					PSD2	pleckstrin and Sec7 domain containing 2
ATP1A2	ATPase, Na+/K+ transporting, alpha 2 polypeptide			LRRN2	leucine rich repeat neuronal 2					PBXIP1	PBX homeobox interacting protein 1					PSKH1	protein serine kinase H1
ATP1A3	ATPase, Na+/K+ transporting, alpha 3 polypeptide			LRTM2	leucine-rich repeats and transmembrane domains 2					PCDHB6	protocadherin beta 6					PTAFR	platelet activating factor receptor
ATP1B2	ATPase, Na+/K+ transporting, beta 2 polypeptide			LSAMP	limbic system-associated membrane protein					PCGF3	polycomb group ring finger 3					PTDSS2	phosphatidylserine synthase 2
ATP1B4	ATPase, Na+/K+ transporting, beta 4 polypeptide			LSM10	LSM10, U7 small nuclear RNA associated					PDSS2	decaprenyl diphosphate synthase subunit 2					PTP4A1	protein tyrosine phosphatase type IVA, member 1
ATP2B3	ATPase, Ca++ transporting, plasma membrane 3			LSM4	LSM4 homolog, U6 small nuclear RNA associated (S. cerevisiae)					PEX12	peroxisomal biogenesis factor 12					PXMP4	peroxisomal membrane protein 4
ATP5J2-PTCD1	ATP5J2-PTCD1 readthrough			LSMEM2	leucine-rich single-pass membrane protein 2					PGS1	phosphatidylglycerophosphate synthase 1					QSOX1	quiescin sulfhydryl oxidase 1
ATP6V0D1	ATPase, H+ transporting, lysosomal 38kDa, V0 subunit d1			LSS	lanosterol synthase (2,3-oxidosqualene-lanosterol cyclase)					PHF19	PHD finger protein 19					RAB11A	RAB11A, member RAS oncogene family
ATP6V0E1	ATPase, H+ transporting, lysosomal 9kDa, V0 subunit e1			LST1	leukocyte specific transcript 1					PHF23	PHD finger protein 23					RAB3B	RAB3B, member RAS oncogene family
ATP6V0E2	ATPase, H+ transporting V0 subunit e2			LTBP4	latent transforming growth factor beta binding protein 4					PHKG2	phosphorylase kinase catalytic subunit gamma 2					RAB8B	RAB8B, member RAS oncogene family
ATP6V1C1	ATPase, H+ transporting, lysosomal 42kDa, V1 subunit C1			LTBR	lymphotoxin beta receptor (TNFR superfamily, member 3)					PHTF2	putative homeodomain transcription factor 2					RAD9A	RAD9 checkpoint clamp component A
ATP6V1F	ATPase, H+ transporting, lysosomal 14kDa, V1 subunit F			LTC4S	leukotriene C4 synthase					PIAS2	protein inhibitor of activated STAT 2					RAPH1	Ras association (RalGDS/AF-6) and pleckstrin homology domains 1
ATP7A	ATPase, Cu++ transporting, alpha polypeptide			LTF	lactotransferrin					PIEZO2	piezo type mechanosensitive ion channel component 2					RASGRF2	Ras protein specific guanine nucleotide releasing factor 2
ATP7B	ATPase, Cu++ transporting, beta polypeptide			LTN1	listerin E3 ubiquitin protein ligase 1					PIGS	phosphatidylinositol glycan anchor biosynthesis class S					RASL10B	RAS like family 10 member B
ATP8A1	ATPase, aminophospholipid transporter (APLT), class I, type 8A, member 1			LUC7L	LUC7-like (S. cerevisiae)					PIP4K2B	phosphatidylinositol-5-phosphate 4-kinase type 2 beta					RBM47	RNA binding motif protein 47
ATP8A2	ATPase, aminophospholipid transporter, class I, type 8A, member 2			LUM	lumican					PKMYT1	protein kinase, membrane associated tyrosine/threonine 1					RCN3	reticulocalbin 3
ATP9A	ATPase, class II, type 9A			LUZP1	leucine zipper protein 1					PLA2G4C	phospholipase A2 group IVC					REEP2	receptor accessory protein 2
ATPAF2	ATP synthase mitochondrial F1 complex assembly factor 2			LXN	latexin					PLEKHO2	pleckstrin homology domain containing O2					RETSAT	retinol saturase
ATRNL1	attractin-like 1			LY6E	lymphocyte antigen 6 complex, locus E					PLIN3	perilipin 3					RHBDF1	rhomboid 5 homolog 1
ATXN1	ataxin 1			LY6G6C	lymphocyte antigen 6 complex, locus G6C					PLXNA1	plexin A1					RICTOR	RPTOR independent companion of MTOR complex 2
ATXN1L	ataxin 1-like			LY86	lymphocyte antigen 86					PLXNA4	plexin A4					RIMKLA	ribosomal modification protein rimK like family member A
ATXN7L3	ataxin 7-like 3			LYG1	lysozyme G-like 1					PML	promyelocytic leukemia					RNF183	ring finger protein 183
ATXN7L3B	ataxin 7-like 3B			LYN	v-yes-1 Yamaguchi sarcoma viral related oncogene homolog					POC1B-GALNT4	POC1B-GALNT4 readthrough					RNF24	ring finger protein 24
AVIL	advillin			LYNX1	Ly6/neurotoxin 1					POLE	DNA polymerase epsilon, catalytic subunit					RPH3A	rabphilin 3A
AVL9	AVL9 homolog (S. cerevisiase)			LYPD6	LY6/PLAUR domain containing 6					POLR3A	RNA polymerase III subunit A					RPL32	ribosomal protein L32
AVPR2	arginine vasopressin receptor 2			LYPLA1	lysophospholipase I					POLR3D	RNA polymerase III subunit D					RPP25L	ribonuclease P/MRP subunit p25 like
AWAT2	acyl-CoA wax alcohol acyltransferase 2			LYRM2	LYR motif containing 2					POPDC2	popeye domain containing 2					RRAS	RAS related
AXDND1	axonemal dynein light chain domain containing 1			LYRM4	LYR motif containing 4					PPARA	peroxisome proliferator activated receptor alpha					RTP1	receptor transporter protein 1
AXL	AXL receptor tyrosine kinase			LYVE1	lymphatic vessel endothelial hyaluronan receptor 1					PPARGC1A	PPARG coactivator 1 alpha					SART1	spliceosome associated factor 1, recruiter of U4/U6.U5 tri-snRNP
B3GALT1	UDP-Gal:betaGlcNAc beta 1,3-galactosyltransferase, polypeptide 1			LZIC	leucine zipper and CTNNBIP1 domain containing					PPP1R12B	protein phosphatase 1 regulatory subunit 12B					SATB1	SATB homeobox 1
B3GALT5	UDP-Gal:betaGlcNAc beta 1,3-galactosyltransferase, polypeptide 5			LZTR1	leucine-zipper-like transcription regulator 1					PPP1R13B	protein phosphatase 1 regulatory subunit 13B					SCN1B	sodium voltage-gated channel beta subunit 1
B3GAT1	beta-1,3-glucuronyltransferase 1 (glucuronosyltransferase P)			LZTS1	leucine zipper, putative tumor suppressor 1					PPP3R1	protein phosphatase 3 regulatory subunit B, alpha					SCN4A	sodium voltage-gated channel alpha subunit 4
B3GNT1	UDP-GlcNAc:betaGal beta-1,3-N-acetylglucosaminyltransferase 1			M1AP	meiosis 1 associated protein					PRKAR2A	protein kinase cAMP-dependent type II regulatory subunit alpha					SDC3	syndecan 3
B4GALNT1	beta-1,4-N-acetyl-galactosaminyl transferase 1			MACC1	metastasis associated in colon cancer 1					PRKRIP1	PRKR interacting protein 1					SDCBP2	syndecan binding protein 2
B4GALNT3	beta-1,4-N-acetyl-galactosaminyl transferase 3			MACROD2	MACRO domain containing 2					PRMT3	protein arginine methyltransferase 3					SDHAF2	succinate dehydrogenase complex assembly factor 2
B4GALT1	UDP-Gal:betaGlcNAc beta 1,4- galactosyltransferase, polypeptide 1			MAD2L1BP	MAD2L1 binding protein					PRR13	proline rich 13					SECISBP2	SECIS binding protein 2
B4GALT5	UDP-Gal:betaGlcNAc beta 1,4- galactosyltransferase, polypeptide 5			MAGEB10	melanoma antigen family B, 10					PSAPL1	prosaposin like 1 (gene/pseudogene)					SERPINA6	serpin family A member 6
B9D1	B9 protein domain 1			MAGED1	melanoma antigen family D, 1					PSD2	pleckstrin and Sec7 domain containing 2					SETD1A	SET domain containing 1A, histone lysine methyltransferase
BACE1	beta-site APP-cleaving enzyme 1			MAGEE1	melanoma antigen family E, 1					PSKH1	protein serine kinase H1					SETD9	SET domain containing 9
BACE2	beta-site APP-cleaving enzyme 2			MAGI2	membrane associated guanylate kinase, WW and PDZ domain containing 2					PTAFR	platelet activating factor receptor					SETX	senataxin
BAHD1	bromo adjacent homology domain containing 1			MAGI3	membrane associated guanylate kinase, WW and PDZ domain containing 3					PTDSS2	phosphatidylserine synthase 2					SGPL1	sphingosine-1-phosphate lyase 1
BAIAP2	BAI1-associated protein 2			MAGT1	magnesium transporter 1					PTP4A1	protein tyrosine phosphatase type IVA, member 1					SH3GLB1	SH3 domain containing GRB2 like, endophilin B1
BAIAP3	BAI1-associated protein 3			MAL	mal, T-cell differentiation protein					PUS10	pseudouridine synthase 10					SHC2	SHC adaptor protein 2
BAK1	BCL2-antagonist/killer 1			MALSU1	mitochondrial assembly of ribosomal large subunit 1					PXMP4	peroxisomal membrane protein 4					SHISA6	shisa family member 6
BAP1	BRCA1 associated protein-1 (ubiquitin carboxy-terminal hydrolase)			MALT1	mucosa associated lymphoid tissue lymphoma translocation gene 1					QSOX1	quiescin sulfhydryl oxidase 1					SIX1	SIX homeobox 1
BARHL1	BarH-like homeobox 1			MAML3	mastermind-like 3 (Drosophila)					RAB11A	RAB11A, member RAS oncogene family					SLC12A6	solute carrier family 12 member 6
BARHL2	BarH-like homeobox 2			MAMLD1	mastermind-like domain containing 1					RAB3B	RAB3B, member RAS oncogene family					SLC13A5	solute carrier family 13 member 5
BARX1	BARX homeobox 1			MAN1B1	mannosidase, alpha, class 1B, member 1					RAB8B	RAB8B, member RAS oncogene family					SLC19A2	solute carrier family 19 member 2
BATF	basic leucine zipper transcription factor, ATF-like			MAN2A2	mannosidase, alpha, class 2A, member 2					RAD9A	RAD9 checkpoint clamp component A					SLC1A2	solute carrier family 1 member 2
BAX	BCL2-associated X protein			MANBAL	mannosidase, beta A, lysosomal-like					RAPH1	Ras association (RalGDS/AF-6) and pleckstrin homology domains 1					SLC25A42	solute carrier family 25 member 42
BAZ2A	bromodomain adjacent to zinc finger domain, 2A			MAOB	monoamine oxidase B					RASGRF2	Ras protein specific guanine nucleotide releasing factor 2					SLC26A6	solute carrier family 26 member 6
BBS1	Bardet-Biedl syndrome 1			MAP10	microtubule-associated protein 10					RASL10B	RAS like family 10 member B					SLC26A9	solute carrier family 26 member 9
BCAP29	B-cell receptor-associated protein 29			MAP2K2	mitogen-activated protein kinase kinase 2					RBM4	RNA binding motif protein 4					SLC30A2	solute carrier family 30 member 2
BCAS1	breast carcinoma amplified sequence 1			MAP2K6	mitogen-activated protein kinase kinase 6					RBM41	RNA binding motif protein 41					SLC36A1	solute carrier family 36 member 1
BCAS3	breast carcinoma amplified sequence 3			MAP3K2	mitogen-activated protein kinase kinase kinase 2					RBM47	RNA binding motif protein 47					SLC36A3	solute carrier family 36 member 3
BCAS4	breast carcinoma amplified sequence 4			MAP3K3	mitogen-activated protein kinase kinase kinase 3					RCN3	reticulocalbin 3					SLC39A3	solute carrier family 39 member 3
BCKDK	branched chain ketoacid dehydrogenase kinase			MAP3K7CL	MAP3K7 C-terminal like					REEP2	receptor accessory protein 2					SLC46A1	solute carrier family 46 member 1
BCL2	B-cell CLL/lymphoma 2			MAP3K9	mitogen-activated protein kinase kinase kinase 9					RETSAT	retinol saturase					SLC6A17	solute carrier family 6 member 17
BCL2L10	BCL2-like 10 (apoptosis facilitator)			MAP4	microtubule-associated protein 4					RGS8	regulator of G protein signaling 8					SLC6A6	solute carrier family 6 member 6
BCL2L13	BCL2-like 13 (apoptosis facilitator)			MAP4K4	mitogen-activated protein kinase kinase kinase kinase 4					RHBDF1	rhomboid 5 homolog 1					SLC9A8	solute carrier family 9 member A8
BCL9L	B-cell CLL/lymphoma 9-like			MAP6D1	MAP6 domain containing 1					RICTOR	RPTOR independent companion of MTOR complex 2					SMAD2	SMAD family member 2
BCORL1	BCL6 corepressor-like 1			MAP9	microtubule-associated protein 9					RIMKLA	ribosomal modification protein rimK like family member A					SMARCD1	SWI/SNF related, matrix associated, actin dependent regulator of chromatin, subfamily d, member 1
BCR	breakpoint cluster region			MAPK4	mitogen-activated protein kinase 4					RNF183	ring finger protein 183					SMG1	SMG1, nonsense mediated mRNA decay associated PI3K related kinase
BDH2	3-hydroxybutyrate dehydrogenase, type 2			MAPK8IP2	mitogen-activated protein kinase 8 interacting protein 2					RNF24	ring finger protein 24					SNX2	sorting nexin 2
BDP1	B double prime 1, subunit of RNA polymerase III transcription initiation factor IIIB			MAPK8IP3	mitogen-activated protein kinase 8 interacting protein 3					RPH3A	rabphilin 3A					SNX3	sorting nexin 3
BEND4	BEN domain containing 4			MAPKBP1	mitogen-activated protein kinase binding protein 1					RPL32	ribosomal protein L32					SNX30	sorting nexin family member 30
BEND6	BEN domain containing 6			MAPT	microtubule-associated protein tau					RPP25L	ribonuclease P/MRP subunit p25 like					SOBP	sine oculis binding protein homolog
BEST3	bestrophin 3			MARCH1	membrane-associated ring finger (C3HC4) 1, E3 ubiquitin protein ligase					RPS10-NUDT3	RPS10-NUDT3 readthrough					SOX5	SRY-box 5
BHLHA15	basic helix-loop-helix family, member a15			MARCH6	membrane-associated ring finger (C3HC4) 6, E3 ubiquitin protein ligase					RPS3A	ribosomal protein S3A					SP140L	SP140 nuclear body protein
BICC1	bicaudal C homolog 1 (Drosophila)			MARCH7	membrane-associated ring finger (C3HC4) 7, E3 ubiquitin protein ligase					RRAS	RAS related					SPOCK1	SPARC (osteonectin), cwcv and kazal like domains proteoglycan 1
BIN3	bridging integrator 3			MARCH8	membrane-associated ring finger (C3HC4) 8, E3 ubiquitin protein ligase					RTP1	receptor transporter protein 1					SPOCK2	SPARC (osteonectin), cwcv and kazal like domains proteoglycan 2
BLCAP	bladder cancer associated protein			MARCH9	membrane-associated ring finger (C3HC4) 9					SART1	spliceosome associated factor 1, recruiter of U4/U6.U5 tri-snRNP					SPRY4	sprouty RTK signaling antagonist 4
BMF	Bcl2 modifying factor			MARCKS	myristoylated alanine-rich protein kinase C substrate					SATB1	SATB homeobox 1					SPSB1	splA/ryanodine receptor domain and SOCS box containing 1
BMP8A	bone morphogenetic protein 8a			MARK4	MAP/microtubule affinity-regulating kinase 4					SAXO1	stabilizer of axonemal microtubules 1					SRGAP1	SLIT-ROBO Rho GTPase activating protein 1
BMP8B	bone morphogenetic protein 8b			MARVELD1	MARVEL domain containing 1					SAXO2	stabilizer of axonemal microtubules 2					SRRM4	serine/arginine repetitive matrix 4
BMPR1A	bone morphogenetic protein receptor, type IA			MAST3	microtubule associated serine/threonine kinase 3					SCN1B	sodium voltage-gated channel beta subunit 1					SSBP2	single stranded DNA binding protein 2
BNC2	basonuclin 2			MAST4	microtubule associated serine/threonine kinase family member 4					SCN4A	sodium voltage-gated channel alpha subunit 4					SSR2	signal sequence receptor subunit 2
BNIPL	BCL2/adenovirus E1B 19kD interacting protein like			MAT1A	methionine adenosyltransferase I, alpha					SDC3	syndecan 3					ST3GAL1	ST3 beta-galactoside alpha-2,3-sialyltransferase 1
BRAF	v-raf murine sarcoma viral oncogene homolog B			MAU2	MAU2 sister chromatid cohesion factor					SDCBP2	syndecan binding protein 2					STRADB	STE20 related adaptor beta
BRD1	bromodomain containing 1			MAX	MYC associated factor X					SDHAF2	succinate dehydrogenase complex assembly factor 2					STX2	syntaxin 2
BRD3	bromodomain containing 3			MAZ	MYC-associated zinc finger protein (purine-binding transcription factor)					SECISBP2	SECIS binding protein 2					STYXL1	serine/threonine/tyrosine interacting like 1
BRD7	bromodomain containing 7			MB	myoglobin					SELENOF	selenoprotein F					SUN2	Sad1 and UNC84 domain containing 2
BRE	brain and reproductive organ-expressed (TNFRSF1A modulator)			MBD1	methyl-CpG binding domain protein 1					SERPINA6	serpin family A member 6					SUSD2	sushi domain containing 2
BRF1	BRF1, RNA polymerase III transcription initiation factor 90 kDa subunit			MBD3	methyl-CpG binding domain protein 3					SETD1A	SET domain containing 1A, histone lysine methyltransferase					SYNGR2	synaptogyrin 2
BRI3BP	BRI3 binding protein			MBD5	methyl-CpG binding domain protein 5					SETD9	SET domain containing 9					SYT2	synaptotagmin 2
BRINP2	bone morphogenetic protein/retinoic acid inducible neural-specific 2			MBD6	methyl-CpG binding domain protein 6					SETX	senataxin					SYT7	synaptotagmin 7
BRMS1L	breast cancer metastasis-suppressor 1-like			MBL2	mannose-binding lectin (protein C) 2, soluble					SGPL1	sphingosine-1-phosphate lyase 1					SZT2	SZT2, KICSTOR complex subunit
BRSK2	BR serine/threonine kinase 2			MBLAC2	metallo-beta-lactamase domain containing 2					SH3GLB1	SH3 domain containing GRB2 like, endophilin B1					TARBP2	TARBP2, RISC loading complex RNA binding subunit
BSG	basigin			MBNL3	muscleblind-like splicing regulator 3					SHC2	SHC adaptor protein 2					TBC1D16	TBC1 domain family member 16
BSND	Bartter syndrome, infantile, with sensorineural deafness (Barttin)			MBOAT7	membrane bound O-acyltransferase domain containing 7					SHISA6	shisa family member 6					TBC1D24	TBC1 domain family member 24
BST2	bone marrow stromal cell antigen 2			MCAM	melanoma cell adhesion molecule					SHISAL1	shisa like 1					TBCK	TBC1 domain containing kinase
BTBD18	BTB (POZ) domain containing 18			MCC	mutated in colorectal cancers					SIX1	SIX homeobox 1					TBRG1	transforming growth factor beta regulator 1
BTBD19	BTB (POZ) domain containing 19			MCF2L	MCF.2 cell line derived transforming sequence-like					SLC12A6	solute carrier family 12 member 6					TCL1B	T cell leukemia/lymphoma 1B
BTBD9	BTB (POZ) domain containing 9			MCF2L2	MCF.2 cell line derived transforming sequence-like 2					SLC13A5	solute carrier family 13 member 5					TDRP	testis development related protein
BTD	biotinidase			MCL1	myeloid cell leukemia sequence 1 (BCL2-related)					SLC19A2	solute carrier family 19 member 2					TGM2	transglutaminase 2
BTF3L4	basic transcription factor 3-like 4			MCM4	minichromosome maintenance complex component 4					SLC1A2	solute carrier family 1 member 2					THEM4	thioesterase superfamily member 4
BTG2	BTG family, member 2			MCM5	minichromosome maintenance complex component 5					SLC25A42	solute carrier family 25 member 42					TIAM1	T cell lymphoma invasion and metastasis 1
BTN3A1	butyrophilin, subfamily 3, member A1			MCMBP	minichromosome maintenance complex binding protein					SLC26A6	solute carrier family 26 member 6					TLL1	TP53 induced glycolysis regulatory phosphatase
BTN3A2	butyrophilin, subfamily 3, member A2			MCMDC2	minichromosome maintenance domain containing 2					SLC26A9	solute carrier family 26 member 9					TLN2	tolloid like 1
BTNL9	butyrophilin-like 9			MCRS1	microspherule protein 1					SLC30A2	solute carrier family 30 member 2					TLX2	talin 2
BX255923.1	HDCMB45P; Uncharacterized protein			MCTP1	multiple C2 domains, transmembrane 1					SLC36A1	solute carrier family 36 member 1					TMBIM6	T cell leukemia homeobox 2
C10orf105	chromosome 10 open reading frame 105			MDGA1	MAM domain containing glycosylphosphatidylinositol anchor 1					SLC36A3	solute carrier family 36 member 3					TMCC2	transmembrane and coiled-coil domain family 2
C10orf11	chromosome 10 open reading frame 11			MDK	midkine (neurite growth-promoting factor 2)					SLC39A3	solute carrier family 39 member 3					TMEM104	transmembrane protein 104
C10orf12	chromosome 10 open reading frame 12			MDM2	MDM2 oncogene, E3 ubiquitin protein ligase					SLC46A1	solute carrier family 46 member 1					TMEM132D	transmembrane protein 132D
C10orf126	chromosome 10 open reading frame 126			MDM4	Mdm4 p53 binding protein homolog (mouse)					SLC6A17	solute carrier family 6 member 17					TMEM170B	transmembrane protein 170B
C10orf53	chromosome 10 open reading frame 53			MECP2	methyl CpG binding protein 2 (Rett syndrome)					SLC6A6	solute carrier family 6 member 6					TMEM184B	transmembrane protein 184B
C10orf71	chromosome 10 open reading frame 71			MED15	mediator complex subunit 15					SLC9A8	solute carrier family 9 member A8					TMEM19	transmembrane protein 19
C10orf76	chromosome 10 open reading frame 76			MED16	mediator complex subunit 16					SMAD2	SMAD family member 2					TMEM216	transmembrane protein 216
C11orf21	chromosome 11 open reading frame 21			MED20	mediator complex subunit 20					SMARCD1	SWI/SNF related, matrix associated, actin dependent regulator of chromatin, subfamily d, member 1					TMEM239	transmembrane protein 239
C11orf44	chromosome 11 open reading frame 44			MED22	mediator complex subunit 22					SMG1	SMG1, nonsense mediated mRNA decay associated PI3K related kinase					TMEM86A	transmembrane protein 86A
C11orf45	chromosome 11 open reading frame 45			MED24	mediator complex subunit 24					SMIM25	small integral membrane protein 25					TMEM99	transmembrane protein 99
C11orf53	chromosome 11 open reading frame 53			MED27	mediator complex subunit 27					SNX2	sorting nexin 2					TMPRSS4	transmembrane serine protease 4
C11orf54	chromosome 11 open reading frame 54			MED28	mediator complex subunit 28					SNX3	sorting nexin 3					TNF	tumor necrosis factor
C11orf70	chromosome 11 open reading frame 70			MED29	mediator complex subunit 29					SNX30	sorting nexin family member 30					TNFRSF10D	TNF receptor superfamily member 10d
C12orf4	chromosome 12 open reading frame 4			MED31	mediator complex subunit 31					SOBP	sine oculis binding protein homolog					TNFRSF12A	TNF receptor superfamily member 12A
C12orf44	chromosome 12 open reading frame 44			MED9	mediator complex subunit 9					SOGA1	suppressor of glucose, autophagy associated 1					TNIP1	TNFAIP3 interacting protein 1
C12orf49	chromosome 12 open reading frame 49			MEF2B	myocyte enhancer factor 2B					SOX5	SRY-box 5					TNRC6B	trinucleotide repeat containing 6B
C12orf5	chromosome 12 open reading frame 5			MEF2D	myocyte enhancer factor 2D					SP140	SP140 nuclear body protein					TOP1	DNA topoisomerase I
C12orf66	chromosome 12 open reading frame 66			MEFV	Mediterranean fever					SP140L	SP140 nuclear body protein like					TPD52L2	TPD52 like 2
C12orf79	chromosome 12 open reading frame 79			MEGF8	multiple EGF-like-domains 8					SPOCK1	SPARC (osteonectin), cwcv and kazal like domains proteoglycan 1					TRABD2B	TraB domain containing 2B
C14orf1	chromosome 14 open reading frame 1			METTL12	methyltransferase like 12					SPOCK2	SPARC (osteonectin), cwcv and kazal like domains proteoglycan 2					TRAF3	TNF receptor associated factor 3
C14orf105	chromosome 14 open reading frame 105			METTL14	methyltransferase like 14					SPRY4	sprouty RTK signaling antagonist 4					TRAPPC2L	trafficking protein particle complex 2 like
C14orf144	chromosome 14 open reading frame 144			METTL15	methyltransferase like 15					SPSB1	splA/ryanodine receptor domain and SOCS box containing 1					TRIM41	tripartite motif containing 41
C14orf164	chromosome 14 open reading frame 164			METTL20	methyltransferase like 20					SRGAP1	SLIT-ROBO Rho GTPase activating protein 1					TRIM7	tripartite motif containing 7
C14orf2	chromosome 14 open reading frame 2			METTL21B	methyltransferase like 21B					SRRM4	serine/arginine repetitive matrix 4					TRIOBP	TRIO and F-actin binding protein
C14orf23	chromosome 14 open reading frame 23			METTL22	methyltransferase like 22					SSBP2	single stranded DNA binding protein 2					TRIT1	tRNA isopentenyltransferase 1
C14orf79	chromosome 14 open reading frame 79			METTL8	methyltransferase like 8					SSR2	signal sequence receptor subunit 2					TRMT61A	tRNA methyltransferase 61A
C15ORF37	C15orf37 protein; Uncharacterized protein			METTL9	methyltransferase like 9					ST3GAL1	ST3 beta-galactoside alpha-2,3-sialyltransferase 1					TRPM6	transient receptor potential cation channel subfamily M member 6
C15orf37	chromosome 15 open reading frame 37			MEX3A	mex-3 RNA binding family member A					STMN1	stathmin 1					TSHZ1	teashirt zinc finger homeobox 1
C15orf38	chromosome 15 open reading frame 38			MEX3B	mex-3 RNA binding family member B					STRADB	STE20 related adaptor beta					TSKU	tsukushi, small leucine rich proteoglycan
C15orf38-AP3S2	C15orf38-AP3S2 readthrough			MFAP3	microfibrillar-associated protein 3					STX2	syntaxin 2					TSSK1B	testis specific serine kinase 1B
C15orf40	chromosome 15 open reading frame 40			MFHAS1	malignant fibrous histiocytoma amplified sequence 1					STYXL1	serine/threonine/tyrosine interacting like 1					TTBK1	tau tubulin kinase 1
C15orf52	chromosome 15 open reading frame 52			MFN1	mitofusin 1					SUN2	Sad1 and UNC84 domain containing 2					TTC31	tetratricopeptide repeat domain 31
C15orf54	chromosome 15 open reading frame 54			MFN2	mitofusin 2					SUSD2	sushi domain containing 2					TTC39C	tetratricopeptide repeat domain 39C
C16orf59	chromosome 16 open reading frame 59			MFNG	MFNG O-fucosylpeptide 3-beta-N-acetylglucosaminyltransferase					SUSD4	sushi domain containing 4					TTC9C	tetratricopeptide repeat domain 9C
C16orf70	chromosome 16 open reading frame 70			MFSD12	major facilitator superfamily domain containing 12					SYNGR2	synaptogyrin 2					TWF1	twinfilin actin binding protein 1
C16orf72	chromosome 16 open reading frame 72			MFSD2B	major facilitator superfamily domain containing 2B					SYT2	synaptotagmin 2					TXNDC5	thioredoxin domain containing 5
C17orf100	chromosome 17 open reading frame 100			MGAM	maltase-glucoamylase (alpha-glucosidase)					SYT7	synaptotagmin 7					UBE2I	ubiquitin conjugating enzyme E2 I
C17orf102	chromosome 17 open reading frame 102			MGAT1	mannosyl (alpha-1,3-)-glycoprotein beta-1,2-N-acetylglucosaminyltransferase					SZT2	SZT2, KICSTOR complex subunit					UBE2Q1	ubiquitin conjugating enzyme E2 Q1
C17orf103	chromosome 17 open reading frame 103			MGAT5	mannosyl (alpha-1,6-)-glycoprotein beta-1,6-N-acetyl-glucosaminyltransferase					TARBP2	TARBP2, RISC loading complex RNA binding subunit					UBL4B	ubiquitin like 4B
C17orf47	chromosome 17 open reading frame 47			MGAT5B	mannosyl (alpha-1,6-)-glycoprotein beta-1,6-N-acetyl-glucosaminyltransferase, isozyme B					TBC1D16	TBC1 domain family member 16					UBQLN1	ubiquilin 1
C17orf50	chromosome 17 open reading frame 50			MGME1	mitochondrial genome maintenance exonuclease 1					TBC1D24	TBC1 domain family member 24					UCN2	urocortin 2
C17orf51	chromosome 17 open reading frame 51			MGRN1	mahogunin ring finger 1, E3 ubiquitin protein ligase					TBCK	TBC1 domain containing kinase					UPRT	uracil phosphoribosyltransferase homolog
C17orf72	chromosome 17 open reading frame 72			MGST3	microsomal glutathione S-transferase 3					TBRG1	transforming growth factor beta regulator 1					USP2	ubiquitin specific peptidase 2
C17orf75	chromosome 17 open reading frame 75			MIB1	mindbomb E3 ubiquitin protein ligase 1					TCL1B	T cell leukemia/lymphoma 1B					VPS9D1	VPS9 domain containing 1
C17orf82	chromosome 17 open reading frame 82			MICAL2	microtubule associated monooxygenase, calponin and LIM domain containing 2					TDRP	testis development related protein					VRK2	VRK serine/threonine kinase 2
C17orf85	chromosome 17 open reading frame 85			MICALCL	MICAL C-terminal like					TENT4B	terminal nucleotidyltransferase 4B					VSIG10L	V-set and immunoglobulin domain containing 10 like
C17orf96	chromosome 17 open reading frame 96			MICALL1	MICAL-like 1					TGM2	transglutaminase 2					VWA3A	von Willebrand factor A domain containing 3A
C18orf42	chromosome 18 open reading frame 42			MICU1	mitochondrial calcium uptake 1					THEM4	thioesterase superfamily member 4					WDR25	WD repeat domain 25
C18orf56	chromosome 18 open reading frame 56			MID2	midline 2					TIAM1	T cell lymphoma invasion and metastasis 1					WDR5	WD repeat domain 5
C19orf10	chromosome 19 open reading frame 10			MIER2	mesoderm induction early response 1, family member 2					TIGAR	TP53 induced glycolysis regulatory phosphatase					WDR72	WD repeat domain 72
C19orf24	chromosome 19 open reading frame 24			MINA	MYC induced nuclear antigen					TLL1	tolloid like 1					WIZ	WIZ zinc finger
C19orf35	chromosome 19 open reading frame 35			MINOS1-NBL1	MINOS1-NBL1 readthrough					TLN2	talin 2					WNT10B	Wnt family member 10B
C19orf48	chromosome 19 open reading frame 48			MIP	major intrinsic protein of lens fiber					TLX2	T cell leukemia homeobox 2					XK	X-linked Kx blood group
C19orf54	chromosome 19 open reading frame 54			MITF	microphthalmia-associated transcription factor					TMBIM6	transmembrane BAX inhibitor motif containing 6					YBX2	Y-box binding protein 2
C19orf69	chromosome 19 open reading frame 69			MKI67IP	MKI67 (FHA domain) interacting nucleolar phosphoprotein					TMCC2	transmembrane and coiled-coil domain family 2					YWHAG	tyrosine 3-monooxygenase/tryptophan 5-monooxygenase activation protein gamma
C1orf106	chromosome 1 open reading frame 106			MKKS	McKusick-Kaufman syndrome					TMEM104	transmembrane protein 104					ZBED2	zinc finger BED-type containing 2
C1orf112	chromosome 1 open reading frame 112			MKL2	MKL/myocardin-like 2					TMEM132D	transmembrane protein 132D					ZBED4	zinc finger BED-type containing 4
C1orf147	chromosome 1 open reading frame 147			MKLN1	muskelin 1, intracellular mediator containing kelch motifs					TMEM170B	transmembrane protein 170B					ZBTB24	zinc finger and BTB domain containing 24
C1orf158	chromosome 1 open reading frame 158			MKNK1	MAP kinase interacting serine/threonine kinase 1					TMEM184B	transmembrane protein 184B					ZBTB39	zinc finger and BTB domain containing 39
C1orf198	chromosome 1 open reading frame 198			MKS1	Meckel syndrome, type 1					TMEM19	transmembrane protein 19					ZCCHC14	zinc finger CCHC-type containing 14
C1orf200	chromosome 1 open reading frame 200			MLLT3	myeloid/lymphoid or mixed-lineage leukemia (trithorax homolog, Drosophila); translocated to, 3					TMEM216	transmembrane protein 216					ZCCHC2	zinc finger CCHC-type containing 2
C1orf21	chromosome 1 open reading frame 21			MLX	MLX, MAX dimerization protein					TMEM239	transmembrane protein 239					ZDHHC3	zinc finger DHHC-type containing 3
C1ORF220				MLXIP	MLX interacting protein					TMEM35A	transmembrane protein 35A					ZER1	zyg-11 related cell cycle regulator
C1orf220	chromosome 1 open reading frame 220			MMAA	methylmalonic aciduria (cobalamin deficiency) cblA type					TMEM86A	transmembrane protein 86A					ZFP41	ZFP41 zinc finger protein
C1orf226	chromosome 1 open reading frame 226			MMGT1	membrane magnesium transporter 1					TMEM99	transmembrane protein 99					ZHX3	zinc fingers and homeoboxes 3
C1orf233	chromosome 1 open reading frame 233			MMP15	matrix metallopeptidase 15 (membrane-inserted)					TMPRSS4	transmembrane serine protease 4					ZNF175	zinc finger protein 175
C1orf35	chromosome 1 open reading frame 35			MMP17	matrix metallopeptidase 17 (membrane-inserted)					TNF	tumor necrosis factor					ZNF24	zinc finger protein 24
C1orf50	chromosome 1 open reading frame 50			MMP24	matrix metallopeptidase 24 (membrane-inserted)					TNFRSF10D	TNF receptor superfamily member 10d					ZNF282	zinc finger protein 282
C1orf64	chromosome 1 open reading frame 64			MMP25	matrix metallopeptidase 25					TNFRSF12A	TNF receptor superfamily member 12A					ZNF451	zinc finger protein 451
C1orf95	chromosome 1 open reading frame 95			MMS22L	MMS22-like, DNA repair protein					TNIP1	TNFAIP3 interacting protein 1					ZNF474	zinc finger protein 474
C1QL3	complement component 1, q subcomponent-like 3			MN1	meningioma (disrupted in balanced translocation) 1					TNRC6B	trinucleotide repeat containing 6B					ZNF501	zinc finger protein 501
C1QTNF1	C1q and tumor necrosis factor related protein 1			MNAT1	MNAT CDK-activating kinase assembly factor 1					TOP1	DNA topoisomerase I					ZNF585A	zinc finger protein 585A
C1QTNF2	C1q and tumor necrosis factor related protein 2			MNT	MNT, MAX dimerization protein					TPD52L2	TPD52 like 2					ZNF623	zinc finger protein 623
C1QTNF8	C1q and tumor necrosis factor related protein 8			MOAP1	modulator of apoptosis 1					TRABD2B	TraB domain containing 2B					ZNF70	zinc finger protein 70
C20orf194	chromosome 20 open reading frame 194			MOB3A	MOB kinase activator 3A					TRAF3	TNF receptor associated factor 3					ZNF71	zinc finger protein 71
C20orf196	chromosome 20 open reading frame 196			MOB3C	MOB kinase activator 3C					TRAPPC2L	trafficking protein particle complex 2 like					ZNF784	zinc finger protein 784
C21orf54	chromosome 21 open reading frame 54			MOCOS	molybdenum cofactor sulfurase					TRIM41	tripartite motif containing 41					ZSCAN25	zinc finger and SCAN domain containing 25
C21orf58	chromosome 21 open reading frame 58			MOCS1	molybdenum cofactor synthesis 1					TRIM7	tripartite motif containing 7					ZSWIM6	zinc finger SWIM-type containing 6
C21orf90	chromosome 21 open reading frame 90			MOCS2	molybdenum cofactor synthesis 2					TRIOBP	TRIO and F-actin binding protein
C21orf91	chromosome 21 open reading frame 91			MON1A	MON1 secretory trafficking family member A					TRIT1	tRNA isopentenyltransferase 1
C22orf23	chromosome 22 open reading frame 23			MON1B	MON1 secretory trafficking family member B					TRMT61A	tRNA methyltransferase 61A
C22orf24	chromosome 22 open reading frame 24			MON2	MON2 homolog (S. cerevisiae)					TRPM6	transient receptor potential cation channel subfamily M member 6
C22orf26	chromosome 22 open reading frame 26			MORN4	MORN repeat containing 4					TSHZ1	teashirt zinc finger homeobox 1
C22orf46	chromosome 22 open reading frame 46			MPLKIP	M-phase specific PLK1 interacting protein					TSKU	tsukushi, small leucine rich proteoglycan
C2orf15	chromosome 2 open reading frame 15			MPND	MPN domain containing					TSSK1B	testis specific serine kinase 1B
C2ORF15	Uncharacterized protein C2orf15			MPP6	membrane protein, palmitoylated 6 (MAGUK p55 subfamily member 6)					TSTD3	thiosulfate sulfurtransferase like domain containing 3
C2orf71	chromosome 2 open reading frame 71			MPRIP	myosin phosphatase Rho interacting protein					TTBK1	tau tubulin kinase 1
C2orf72	chromosome 2 open reading frame 72			MPZ	myelin protein zero					TTC22	tetratricopeptide repeat domain 22
C2orf81	chromosome 2 open reading frame 81			MPZL1	myelin protein zero-like 1					TTC31	tetratricopeptide repeat domain 31
C2orf82	chromosome 2 open reading frame 82			MPZL2	myelin protein zero-like 2					TTC39C	tetratricopeptide repeat domain 39C
C2orf88	chromosome 2 open reading frame 88			MR1	major histocompatibility complex, class I-related					TTC9C	tetratricopeptide repeat domain 9C
C2orf91	chromosome 2 open reading frame 91			MRAS	muscle RAS oncogene homolog					TTLL11	tubulin tyrosine ligase like 11
C3	complement component 3			MRC2	mannose receptor, C type 2					TWF1	twinfilin actin binding protein 1
C3orf18	chromosome 3 open reading frame 18			MRGBP	MRG/MORF4L binding protein					TXNDC5	thioredoxin domain containing 5
C3orf33	chromosome 3 open reading frame 33			MRGPRF	MAS-related GPR, member F					UBE2I	ubiquitin conjugating enzyme E2 I
C3orf67	chromosome 3 open reading frame 67			MRM1	mitochondrial rRNA methyltransferase 1 homolog (S. cerevisiae)					UBE2Q1	ubiquitin conjugating enzyme E2 Q1
C3orf72	chromosome 3 open reading frame 72			MRO	maestro					UBL4B	ubiquitin like 4B
C4orf3	chromosome 4 open reading frame 3			MRPL11	mitochondrial ribosomal protein L11					UBQLN1	ubiquilin 1
C4orf50	chromosome 4 open reading frame 50			MRPL12	mitochondrial ribosomal protein L12					UCN2	urocortin 2
C5orf45	chromosome 5 open reading frame 45			MRPL15	mitochondrial ribosomal protein L15					UPRT	uracil phosphoribosyltransferase homolog
C5orf49	chromosome 5 open reading frame 49			MRPL19	mitochondrial ribosomal protein L19					USF3	upstream transcription factor family member 3
C5orf51	chromosome 5 open reading frame 51			MRPL20	mitochondrial ribosomal protein L20					USP2	ubiquitin specific peptidase 2
C5orf63	chromosome 5 open reading frame 63			MRPL22	mitochondrial ribosomal protein L22					VPS9D1	VPS9 domain containing 1
C6orf120	chromosome 6 open reading frame 120			MRPL3	mitochondrial ribosomal protein L3					VRK2	VRK serine/threonine kinase 2
C6orf132	chromosome 6 open reading frame 132			MRPL30	mitochondrial ribosomal protein L30					VSIG10L	V-set and immunoglobulin domain containing 10 like
C6orf141	chromosome 6 open reading frame 141			MRPL35	mitochondrial ribosomal protein L35					VWA3A	von Willebrand factor A domain containing 3A
C6orf211	chromosome 6 open reading frame 211			MRPL36	mitochondrial ribosomal protein L36					WDR25	WD repeat domain 25
C6orf223	chromosome 6 open reading frame 223			MRPL37	mitochondrial ribosomal protein L37					WDR5	WD repeat domain 5
C6orf25	chromosome 6 open reading frame 25			MRPL4	mitochondrial ribosomal protein L4					WDR72	WD repeat domain 72
C6orf89	chromosome 6 open reading frame 89			MRPL46	mitochondrial ribosomal protein L46					WIZ	WIZ zinc finger
C7orf26	chromosome 7 open reading frame 26			MRPS11	mitochondrial ribosomal protein S11					WNT10B	Wnt family member 10B
C7orf50	chromosome 7 open reading frame 50			MRPS14	mitochondrial ribosomal protein S14					XK	X-linked Kx blood group
C7orf73	chromosome 7 open reading frame 73			MRPS25	mitochondrial ribosomal protein S25					YBX2	Y-box binding protein 2
C8A	complement component 8, alpha polypeptide			MRPS26	mitochondrial ribosomal protein S26					YWHAG	tyrosine 3-monooxygenase/tryptophan 5-monooxygenase activation protein gamma
C8G	complement component 8, gamma polypeptide			MRPS27	mitochondrial ribosomal protein S27					ZBED2	zinc finger BED-type containing 2
C8orf33	chromosome 8 open reading frame 33			MRPS36	mitochondrial ribosomal protein S36					ZBED4	zinc finger BED-type containing 4
C9orf170	chromosome 9 open reading frame 170			MRRF	mitochondrial ribosome recycling factor					ZBTB24	zinc finger and BTB domain containing 24
C9orf171	chromosome 9 open reading frame 171			MRS2	MRS2 magnesium transporter					ZBTB39	zinc finger and BTB domain containing 39
C9orf3	chromosome 9 open reading frame 3			MRTO4	mRNA turnover 4 homolog (S. cerevisiae)					ZC3H13	zinc finger CCCH-type containing 13
C9orf40	chromosome 9 open reading frame 40			MRVI1	murine retrovirus integration site 1 homolog					ZCCHC14	zinc finger CCHC-type containing 14
C9orf47	chromosome 9 open reading frame 47			MS4A4A	membrane-spanning 4-domains, subfamily A, member 4A					ZCCHC2	zinc finger CCHC-type containing 2
C9orf64	chromosome 9 open reading frame 64			MS4A7	membrane-spanning 4-domains, subfamily A, member 7					ZDHHC3	zinc finger DHHC-type containing 3
C9orf66	chromosome 9 open reading frame 66			MSANTD4	Myb/SANT-like DNA-binding domain containing 4 with coiled-coils					ZER1	zyg-11 related cell cycle regulator
C9orf96	chromosome 9 open reading frame 96			MSH2	mutS homolog 2					ZFP41	ZFP41 zinc finger protein
CA10	carbonic anhydrase X			MSH5	mutS homolog 5					ZHX3	zinc fingers and homeoboxes 3
CAB39	calcium binding protein 39			MSI2	musashi RNA-binding protein 2					ZNF175	zinc finger protein 175
CABP4	calcium binding protein 4			MSN	moesin					ZNF24	zinc finger protein 24
CABP7	calcium binding protein 7			MSRA	methionine sulfoxide reductase A					ZNF282	zinc finger protein 282
CACNA1A	calcium channel, voltage-dependent, P/Q type, alpha 1A subunit			MSX2	msh homeobox 2					ZNF451	zinc finger protein 451
CACNA1C	calcium channel, voltage-dependent, L type, alpha 1C subunit			MT1A	metallothionein 1A					ZNF474	zinc finger protein 474
CACNA1D	calcium channel, voltage-dependent, L type, alpha 1D subunit			MTA3	metastasis associated 1 family, member 3					ZNF501	zinc finger protein 501
CACNA1E	calcium channel, voltage-dependent, R type, alpha 1E subunit			MTAP	methylthioadenosine phosphorylase					ZNF585A	zinc finger protein 585A
CACNA1H	calcium channel, voltage-dependent, T type, alpha 1H subunit			MT-ATP6	mitochondrially encoded ATP synthase 6					ZNF599	zinc finger protein 599
CACNA1I	calcium channel, voltage-dependent, T type, alpha 1I subunit			MTCH2	mitochondrial carrier 2					ZNF623	zinc finger protein 623
CACNA2D1	calcium channel, voltage-dependent, alpha 2/delta subunit 1			MTDH	metadherin					ZNF664-RFLNA	ZNF664-RFLNA readthrough
CACNA2D2	calcium channel, voltage-dependent, alpha 2/delta subunit 2			MTF1	metal-regulatory transcription factor 1					ZNF70	zinc finger protein 70
CACNG2	calcium channel, voltage-dependent, gamma subunit 2			MTFMT	mitochondrial methionyl-tRNA formyltransferase					ZNF71	zinc finger protein 71
CACNG3	calcium channel, voltage-dependent, gamma subunit 3			MTG2	mitochondrial ribosome-associated GTPase 2					ZNF773	zinc finger protein 773
CACNG8	calcium channel, voltage-dependent, gamma subunit 8			MTHFD1	methylenetetrahydrofolate dehydrogenase (NADP+ dependent) 1, methenyltetrahydrofolate cyclohydrolase, formyltetrahydrofolate synthetase					ZNF784	zinc finger protein 784
CACUL1	CDK2-associated, cullin domain 1			MTHFD1L	methylenetetrahydrofolate dehydrogenase (NADP+ dependent) 1-like					ZNF814	zinc finger protein 814
CAD	carbamoyl-phosphate synthetase 2, aspartate transcarbamylase, and dihydroorotase			MTHFS	5,10-methenyltetrahydrofolate synthetase (5-formyltetrahydrofolate cyclo-ligase)					ZSCAN25	zinc finger and SCAN domain containing 25
CADM1	cell adhesion molecule 1			MTL5	metallothionein-like 5, testis-specific (tesmin)					ZSWIM6	zinc finger SWIM-type containing 6
CADM2	cell adhesion molecule 2			MTMR11	myotubularin related protein 11
CALCOCO1	calcium binding and coiled-coil domain 1			MTMR3	myotubularin related protein 3
CALCOCO2	calcium binding and coiled-coil domain 2			MTMR9	myotubularin related protein 9
CALD1	caldesmon 1			MTO1	mitochondrial tRNA translation optimization 1
CALHM1	calcium homeostasis modulator 1			MTOR	mechanistic target of rapamycin (serine/threonine kinase)
CALM3	calmodulin 3 (phosphorylase kinase, delta)			MTR	5-methyltetrahydrofolate-homocysteine methyltransferase
CALML4	calmodulin-like 4			MTSS1L	metastasis suppressor 1-like
CALU	calumenin			MUC13	mucin 13, cell surface associated
CAMK1D	calcium/calmodulin-dependent protein kinase ID			MUC19	mucin 19, oligomeric
CAMK2A	calcium/calmodulin-dependent protein kinase II alpha			MUC2	mucin 2, oligomeric mucus/gel-forming					SRD5A3	steroid 5 alpha-reductase 3
CAMK2D	calcium/calmodulin-dependent protein kinase II delta			MUC20	mucin 20, cell surface associated					SRFBP1	serum response factor binding protein 1
CAMK2N2	calcium/calmodulin-dependent protein kinase II inhibitor 2			MUC3A	mucin 3A, cell surface associated					SRGAP1	SLIT-ROBO Rho GTPase activating protein 1
CAMK4	calcium/calmodulin-dependent protein kinase IV			MUL1	mitochondrial E3 ubiquitin protein ligase 1					SRI	sorcin
CAMKK1	calcium/calmodulin-dependent protein kinase kinase 1, alpha			MURC	muscle-related coiled-coil protein					SRMS	src-related kinase lacking C-terminal regulatory tyrosine and N-terminal myristylation sites
CAMKK2	calcium/calmodulin-dependent protein kinase kinase 2, beta			MVD	mevalonate (diphospho) decarboxylase					SRPK1	SRSF protein kinase 1
CAMKV	CaM kinase-like vesicle-associated			MXD4	MAX dimerization protein 4					SRPX2	sushi-repeat containing protein, X-linked 2
CAND1	cullin-associated and neddylation-dissociated 1			MXI1	MAX interactor 1, dimerization protein					SRRD	SRR1 domain containing
CANX	calnexin			MXRA7	matrix-remodelling associated 7					SRRM1	serine/arginine repetitive matrix 1
CAPN14	calpain 14			MXRA8	matrix-remodelling associated 8					SRRM3	serine/arginine repetitive matrix 3
CAPN5	calpain 5			MYADML2	myeloid-associated differentiation marker-like 2					SRRM4	serine/arginine repetitive matrix 4
CAPNS1	calpain, small subunit 1			MYCBP2	MYC binding protein 2, E3 ubiquitin protein ligase					SRSF4	serine/arginine-rich splicing factor 4
CAPRIN1	cell cycle associated protein 1			MYCL	v-myc avian myelocytomatosis viral oncogene lung carcinoma derived homolog					SRSF6	serine/arginine-rich splicing factor 6
CAPZA1	capping protein (actin filament) muscle Z-line, alpha 1			MYCN	v-myc avian myelocytomatosis viral oncogene neuroblastoma derived homolog					SRXN1	sulfiredoxin 1
CAPZA2	capping protein (actin filament) muscle Z-line, alpha 2			MYCT1	myc target 1					SSBP2	single-stranded DNA binding protein 2
CAPZB	capping protein (actin filament) muscle Z-line, beta			MYEOV	myeloma overexpressed					SSH1	slingshot protein phosphatase 1
CASP10	caspase 10, apoptosis-related cysteine peptidase			MYF6	myogenic factor 6 (herculin)					SSH2	slingshot protein phosphatase 2
CASP16	caspase 16, apoptosis-related cysteine peptidase (putative)			MYH10	myosin, heavy chain 10, non-muscle					SSH3	slingshot protein phosphatase 3
CASP2	caspase 2, apoptosis-related cysteine peptidase			MYL9	myosin, light chain 9, regulatory					SSR1	signal sequence receptor, alpha
CASZ1	castor zinc finger 1			MYLIP	myosin regulatory light chain interacting protein					SSR2	signal sequence receptor, beta (translocon-associated protein beta)
CATSPERG	catsper channel auxiliary subunit gamma			MYO10	myosin X					SSSCA1	Sjogren syndrome/scleroderma autoantigen 1
CAV2	caveolin 2			MYO18A	myosin XVIIIA					SSTR2	somatostatin receptor 2
CBFA2T2	core-binding factor, runt domain, alpha subunit 2; translocated to, 2			MYO1F	myosin IF					SSUH2	ssu-2 homolog (C. elegans)
CBL	Cbl proto-oncogene, E3 ubiquitin protein ligase			MYO1G	myosin IG					ST20-MTHFS	ST20-MTHFS readthrough
CBLL1	Cbl proto-oncogene-like 1, E3 ubiquitin protein ligase			MYO1H	myosin IH					ST3GAL1	ST3 beta-galactoside alpha-2,3-sialyltransferase 1
CBLN3	cerebellin 3 precursor			MYO6	myosin VI					ST3GAL3	ST3 beta-galactoside alpha-2,3-sialyltransferase 3
CBLN4	cerebellin 4 precursor			MYO9A	myosin IXA					ST5	suppression of tumorigenicity 5
CBX2	chromobox homolog 2			MYOCD	myocardin					ST6GAL1	ST6 beta-galactosamide alpha-2,6-sialyltranferase 1
CBX5	chromobox homolog 5			MYOZ3	myozenin 3					ST6GAL2	ST6 beta-galactosamide alpha-2,6-sialyltranferase 2
CBX6	chromobox homolog 6			MYPN	myopalladin					ST6GALNAC3	ST6 (alpha-N-acetyl-neuraminyl-2,3-beta-galactosyl-1,3)-N-acetylgalactosaminide alpha-2,6-sialyltransferase 3
CC2D1A	coiled-coil and C2 domain containing 1A			MYRF	myelin regulatory factor					ST8SIA1	ST8 alpha-N-acetyl-neuraminide alpha-2,8-sialyltransferase 1
CC2D1B	coiled-coil and C2 domain containing 1B			MYT1L	myelin transcription factor 1-like					ST8SIA2	ST8 alpha-N-acetyl-neuraminide alpha-2,8-sialyltransferase 2
CCBE1	collagen and calcium binding EGF domains 1			MZB1	marginal zone B and B1 cell-specific protein					ST8SIA5	ST8 alpha-N-acetyl-neuraminide alpha-2,8-sialyltransferase 5
CCDC115	coiled-coil domain containing 115			MZF1	myeloid zinc finger 1					STAC2	SH3 and cysteine rich domain 2
CCDC120	coiled-coil domain containing 120			N4BP1	NEDD4 binding protein 1					STAG1	stromal antigen 1
CCDC124	coiled-coil domain containing 124			N6AMT1	N-6 adenine-specific DNA methyltransferase 1 (putative)					STAMBP	STAM binding protein
CCDC127	coiled-coil domain containing 127			NAA15	N(alpha)-acetyltransferase 15, NatA auxiliary subunit					STARD10	StAR-related lipid transfer (START) domain containing 10
CCDC13	coiled-coil domain containing 13			NAA30	N(alpha)-acetyltransferase 30, NatC catalytic subunit					STARD5	StAR-related lipid transfer (START) domain containing 5
CCDC134	coiled-coil domain containing 134			NAA50	N(alpha)-acetyltransferase 50, NatE catalytic subunit					STAT2	signal transducer and activator of transcription 2, 113kDa
CCDC136	coiled-coil domain containing 136			NAA60	N-alpha-acetyltransferase 60					STAT5A	signal transducer and activator of transcription 5A
CCDC140	coiled-coil domain containing 140			NAALAD2	N-acetylated alpha-linked acidic dipeptidase 2					STIM1	stromal interaction molecule 1
CCDC141	coiled-coil domain containing 141			NAALADL2	N-acetylated alpha-linked acidic dipeptidase-like 2					STIP1	stress-induced-phosphoprotein 1
CCDC149	coiled-coil domain containing 149			NAGS	N-acetylglutamate synthase					STK10	serine/threonine kinase 10
CCDC153	coiled-coil domain containing 153			NANOS1	nanos homolog 1 (Drosophila)					STK25	serine/threonine kinase 25
CCDC155	coiled-coil domain containing 155			NAPA	N-ethylmaleimide-sensitive factor attachment protein, alpha					STK35	serine/threonine kinase 35
CCDC167	coiled-coil domain containing 167			NARF	nuclear prelamin A recognition factor					STK38	serine/threonine kinase 38
CCDC171	coiled-coil domain containing 171			NAT10	N-acetyltransferase 10 (GCN5-related)					STK40	serine/threonine kinase 40
CCDC22	coiled-coil domain containing 22			NAT16	N-acetyltransferase 16 (GCN5-related, putative)					STMN3	stathmin-like 3
CCDC30	coiled-coil domain containing 30			NAT6	N-acetyltransferase 6 (GCN5-related)					STOM	stomatin
CCDC42B	coiled-coil domain containing 42B			NAT8L	N-acetyltransferase 8-like (GCN5-related, putative)					STOML1	stomatin (EPB72)-like 1
CCDC58	coiled-coil domain containing 58			NAT9	N-acetyltransferase 9 (GCN5-related, putative)					STON2	stonin 2
CCDC59	coiled-coil domain containing 59			NAV1	neuron navigator 1					STRA6	stimulated by retinoic acid 6
CCDC64	coiled-coil domain containing 64			NAV3	neuron navigator 3					STRADA	STE20-related kinase adaptor alpha
CCDC69	coiled-coil domain containing 69			NBL1	neuroblastoma 1, DAN family BMP antagonist					STRADB	STE20-related kinase adaptor beta
CCDC71L	coiled-coil domain containing 71-like			NCKAP1	NCK-associated protein 1					STRIP1	striatin interacting protein 1
CCDC74A	coiled-coil domain containing 74A			NCKIPSD	NCK interacting protein with SH3 domain					STRN	striatin, calmodulin binding protein
CCDC77	coiled-coil domain containing 77			NCMAP	noncompact myelin associated protein					STRN4	striatin, calmodulin binding protein 4
CCDC8	coiled-coil domain containing 8			NCOA1	nuclear receptor coactivator 1					STT3A	STT3A, subunit of the oligosaccharyltransferase complex (catalytic)
CCDC80	coiled-coil domain containing 80			NCR3LG1	natural killer cell cytotoxicity receptor 3 ligand 1					STX17	syntaxin 17
CCDC85A	coiled-coil domain containing 85A			NCS1	neuronal calcium sensor 1					STX1B	syntaxin 1B
CCDC85C	coiled-coil domain containing 85C			NDEL1	nudE neurodevelopment protein 1-like 1					STX2	syntaxin 2
CCDC92	coiled-coil domain containing 92			NDFIP1	Nedd4 family interacting protein 1					STX3	syntaxin 3
CCDC97	coiled-coil domain containing 97			NDRG3	NDRG family member 3					STX4	syntaxin 4
CCL21	chemokine (C-C motif) ligand 21			NDST1	N-deacetylase/N-sulfotransferase (heparan glucosaminyl) 1					STX5	syntaxin 5
CCL28	chemokine (C-C motif) ligand 28			NDUFA10	NADH dehydrogenase (ubiquinone) 1 alpha subcomplex, 10, 42kDa					STX7	syntaxin 7
CCM2	cerebral cavernous malformation 2			NDUFA3	NADH dehydrogenase (ubiquinone) 1 alpha subcomplex, 3, 9kDa					STXBP4	syntaxin binding protein 4
CCM2L	cerebral cavernous malformation 2-like			NDUFAF3	NADH dehydrogenase (ubiquinone) complex I, assembly factor 3					STYX	serine/threonine/tyrosine interacting protein
CCNE2	cyclin E2			NDUFAF5	NADH dehydrogenase (ubiquinone) complex I, assembly factor 5					STYXL1	serine/threonine/tyrosine interacting-like 1
CCNF	cyclin F			NDUFB5	NADH dehydrogenase (ubiquinone) 1 beta subcomplex, 5, 16kDa					SUCLA2	succinate-CoA ligase, ADP-forming, beta subunit
CCNG1	cyclin G1			NDUFC1	NADH dehydrogenase (ubiquinone) 1, subcomplex unknown, 1, 6kDa					SUFU	suppressor of fused homolog (Drosophila)
CCNK	cyclin K			NDUFC2-KCTD14	NDUFC2-KCTD14 readthrough					SUGT1	SGT1, suppressor of G2 allele of SKP1 (S. cerevisiae)
CCNO	cyclin O			NDUFS1	NADH dehydrogenase (ubiquinone) Fe-S protein 1, 75kDa (NADH-coenzyme Q reductase)					SULF1	sulfatase 1
CCNT1	cyclin T1			NDUFV3	NADH dehydrogenase (ubiquinone) flavoprotein 3, 10kDa					SULT1E1	sulfotransferase family 1E, estrogen-preferring, member 1
CCNT2	cyclin T2			NECAB3	N-terminal EF-hand calcium binding protein 3					SUMF2	sulfatase modifying factor 2
CCNYL1	cyclin Y-like 1			NEGR1	neuronal growth regulator 1					SUMO1	small ubiquitin-like modifier 1
CCR5	chemokine (C-C motif) receptor 5 (gene/pseudogene)			NEK4	NIMA-related kinase 4					SUN1	Sad1 and UNC84 domain containing 1
CCR7	chemokine (C-C motif) receptor 7			NEK6	NIMA-related kinase 6					SUN2	Sad1 and UNC84 domain containing 2
CCS	copper chaperone for superoxide dismutase			NEK9	NIMA-related kinase 9					SUOX	sulfite oxidase
CCSER2	coiled-coil serine-rich protein 2			NELFB	negative elongation factor complex member B					SURF2	surfeit 2
CCZ1B	CCZ1 vacuolar protein trafficking and biogenesis associated homolog B (S. cerevisiae)			NELFCD	negative elongation factor complex member C/D					SUSD1	sushi domain containing 1
CD1D	CD1d molecule			NET1	neuroepithelial cell transforming 1					SUSD2	sushi domain containing 2
CD200	CD200 molecule			NEU1	sialidase 1 (lysosomal sialidase)					SUV420H2	suppressor of variegation 4-20 homolog 2 (Drosophila)
CD209	CD209 molecule			NEURL	neuralized homolog (Drosophila)					SV2A	synaptic vesicle glycoprotein 2A
CD247	CD247 molecule			NEURL4	neuralized homolog 4 (Drosophila)					SVIL	supervillin
CD248	CD248 molecule, endosialin			NEUROD2	neuronal differentiation 2					SYK	spleen tyrosine kinase
CD274	CD274 molecule			NEUROD4	neuronal differentiation 4					SYN3	synapsin III
CD28	CD28 molecule			NF1	neurofibromin 1					SYNC	syncoilin, intermediate filament protein
CD2AP	CD2-associated protein			NF2	neurofibromin 2 (merlin)					SYNDIG1	synapse differentiation inducing 1
CD2BP2	CD2 (cytoplasmic tail) binding protein 2			NFAM1	NFAT activating protein with ITAM motif 1					SYNDIG1L	synapse differentiation inducing 1-like
CD300C	CD300c molecule			NFASC	neurofascin					SYNGR2	synaptogyrin 2
CD300LB	CD300 molecule-like family member b			NFAT5	nuclear factor of activated T-cells 5, tonicity-responsive					SYPL2	synaptophysin-like 2
CD300LF	CD300 molecule-like family member f			NFATC3	nuclear factor of activated T-cells, cytoplasmic, calcineurin-dependent 3					SYT11	synaptotagmin XI
CD300LG	CD300 molecule-like family member g			NFATC4	nuclear factor of activated T-cells, cytoplasmic, calcineurin-dependent 4					SYT14	synaptotagmin XIV
CD34	CD34 molecule			NFE2L1	nuclear factor, erythroid 2-like 1					SYT16	synaptotagmin XVI
CD3D	CD3d molecule, delta (CD3-TCR complex)			NFE2L3	nuclear factor, erythroid 2-like 3					SYT2	synaptotagmin II
CD3E	CD3e molecule, epsilon (CD3-TCR complex)			NFIB	nuclear factor I/B					SYT4	synaptotagmin IV
CD40LG	CD40 ligand			NFIC	nuclear factor I/C (CCAAT-binding transcription factor)					SYT5	synaptotagmin V
CD5	CD5 molecule			NFKBIA	nuclear factor of kappa light polypeptide gene enhancer in B-cells inhibitor, alpha					SYT6	synaptotagmin VI
CD59	CD59 molecule, complement regulatory protein			NFKBIB	nuclear factor of kappa light polypeptide gene enhancer in B-cells inhibitor, beta					SYT7	synaptotagmin VII
CD84	CD84 molecule			NFKBIL1	nuclear factor of kappa light polypeptide gene enhancer in B-cells inhibitor-like 1					SYT9	synaptotagmin IX
CD8A	CD8a molecule			NFX1	nuclear transcription factor, X-box binding 1					SYTL2	synaptotagmin-like 2
CD93	CD93 molecule			NFYA	nuclear transcription factor Y, alpha					SZT2	seizure threshold 2 homolog (mouse)
CD96	CD96 molecule			NGRN	neugrin, neurite outgrowth associated					T	T, brachyury homolog (mouse)
CDAN1	codanin 1			NHLRC4	NHL repeat containing 4					TAB1	TGF-beta activated kinase 1/MAP3K7 binding protein 1
CDC14B	cell division cycle 14B			NIN	ninein (GSK3B interacting protein)					TACC1	transforming, acidic coiled-coil containing protein 1
CDC42BPA	CDC42 binding protein kinase alpha (DMPK-like)			NIPA1	non imprinted in Prader-Willi/Angelman syndrome 1					TACO1	translational activator of mitochondrially encoded cytochrome c oxidase I
CDC42BPB	CDC42 binding protein kinase beta (DMPK-like)			NIPAL4	NIPA-like domain containing 4					TACR1	tachykinin receptor 1
CDC42EP1	CDC42 effector protein (Rho GTPase binding) 1			NIT2	nitrilase family, member 2					TACR2	tachykinin receptor 2
CDC42EP3	CDC42 effector protein (Rho GTPase binding) 3			NKAIN1	Na+/K+ transporting ATPase interacting 1					TACSTD2	tumor-associated calcium signal transducer 2
CDC42EP4	CDC42 effector protein (Rho GTPase binding) 4			NKAIN2	Na+/K+ transporting ATPase interacting 2					TADA2B	transcriptional adaptor 2B
CDCP2	CUB domain containing protein 2			NKAIN3	Na+/K+ transporting ATPase interacting 3					TAGLN	transgelin
CDH1	cadherin 1, type 1, E-cadherin (epithelial)			NKAIN4	Na+/K+ transporting ATPase interacting 4					TAL1	T-cell acute lymphocytic leukemia 1
CDH19	cadherin 19, type 2			NKD1	naked cuticle homolog 1 (Drosophila)					TAL2	T-cell acute lymphocytic leukemia 2
CDH22	cadherin 22, type 2			NKG7	natural killer cell group 7 sequence					TANC2	tetratricopeptide repeat, ankyrin repeat and coiled-coil containing 2
CDH24	cadherin 24, type 2			NKTR	natural killer-tumor recognition sequence					TANGO2	transport and golgi organization 2 homolog (Drosophila)
CDH4	cadherin 4, type 1, R-cadherin (retinal)			NKX3-2	NK3 homeobox 2					TAOK1	TAO kinase 1
CDH6	cadherin 6, type 2, K-cadherin (fetal kidney)			NLGN3	neuroligin 3					TAP2	transporter 2, ATP-binding cassette, sub-family B (MDR/TAP)
CDHR1	cadherin-related family member 1			NLRC3	NLR family, CARD domain containing 3					TARBP2	TAR (HIV-1) RNA binding protein 2
CDK19	cyclin-dependent kinase 19			NLRC5	NLR family, CARD domain containing 5					TATDN2	TatD DNase domain containing 2
CDK2AP2	cyclin-dependent kinase 2 associated protein 2			NLRP9	NLR family, pyrin domain containing 9					TBC1D10A	TBC1 domain family, member 10A
CDK6	cyclin-dependent kinase 6			NLRX1	NLR family member X1					TBC1D10B	TBC1 domain family, member 10B
CDKAL1	CDK5 regulatory subunit associated protein 1-like 1			NMNAT1	nicotinamide nucleotide adenylyltransferase 1					TBC1D13	TBC1 domain family, member 13
CDKL1	cyclin-dependent kinase-like 1 (CDC2-related kinase)			NMNAT2	nicotinamide nucleotide adenylyltransferase 2					TBC1D16	TBC1 domain family, member 16
CDKL2	cyclin-dependent kinase-like 2 (CDC2-related kinase)			NMNAT3	nicotinamide nucleotide adenylyltransferase 3					TBC1D24	TBC1 domain family, member 24
CDKN2A	cyclin-dependent kinase inhibitor 2A			NNT	nicotinamide nucleotide transhydrogenase					TBC1D28	TBC1 domain family, member 28
CDKN2AIP	CDKN2A interacting protein			NOA1	nitric oxide associated 1					TBC1D2B	TBC1 domain family, member 2B
CDKN2AIPNL	CDKN2A interacting protein N-terminal like			NOD1	nucleotide-binding oligomerization domain containing 1					TBC1D5	TBC1 domain family, member 5
CDR2L	cerebellar degeneration-related protein 2-like			NOL12	nucleolar protein 12					TBCK	TBC1 domain containing kinase
CDS1	CDP-diacylglycerol synthase (phosphatidate cytidylyltransferase) 1			NOL9	nucleolar protein 9					TBL1X	transducin (beta)-like 1X-linked
CDS2	CDP-diacylglycerol synthase (phosphatidate cytidylyltransferase) 2			NOP14	NOP14 nucleolar protein					TBL3	transducin (beta)-like 3
CDT1	chromatin licensing and DNA replication factor 1			NOS1AP	nitric oxide synthase 1 (neuronal) adaptor protein					TBPL1	TBP-like 1
CDX1	caudal type homeobox 1			NOS2	nitric oxide synthase 2, inducible					TBRG1	transforming growth factor beta regulator 1
CDX2	caudal type homeobox 2			NOTCH3	notch 3					TBRG4	transforming growth factor beta regulator 4
CEACAM1	carcinoembryonic antigen-related cell adhesion molecule 1 (biliary glycoprotein)			NOTO	notochord homeobox					TBX15	T-box 15
CEACAM19	carcinoembryonic antigen-related cell adhesion molecule 19			NOVA2	neuro-oncological ventral antigen 2					TBX19	T-box 19
CEACAM7	carcinoembryonic antigen-related cell adhesion molecule 7			NOX5	NADPH oxidase, EF-hand calcium binding domain 5					TBX2	T-box 2
CECR2	cat eye syndrome chromosome region, candidate 2			NPAP1	nuclear pore associated protein 1					TBX20	T-box 20
CECR6	cat eye syndrome chromosome region, candidate 6			NPAS1	neuronal PAS domain protein 1					TBXA2R	thromboxane A2 receptor
CEL	carboxyl ester lipase			NPAS3	neuronal PAS domain protein 3					TC2N	tandem C2 domains, nuclear
CELF1	CUGBP, Elav-like family member 1			NPEPPS	aminopeptidase puromycin sensitive					TCEA3	transcription elongation factor A (SII), 3
CELF5	CUGBP, Elav-like family member 5			NPR1	natriuretic peptide receptor A/guanylate cyclase A (atrionatriuretic peptide receptor A)					TCEB2	transcription elongation factor B (SIII), polypeptide 2 (18kDa, elongin B)
CEND1	cell cycle exit and neuronal differentiation 1			NPTXR	neuronal pentraxin receptor					TCEB3	transcription elongation factor B (SIII), polypeptide 3 (110kDa, elongin A)
CENPA	centromere protein A			NPY1R	neuropeptide Y receptor Y1					TCERG1	transcription elongation regulator 1
CENPB	centromere protein B, 80kDa			NPY4R	neuropeptide Y receptor Y4					TCERG1L	transcription elongation regulator 1-like
CENPBD1	CENPB DNA-binding domains containing 1			NQO2	NAD(P)H dehydrogenase, quinone 2					TCF21	transcription factor 21
CENPI	centromere protein I			NR1D1	nuclear receptor subfamily 1, group D, member 1					TCF23	transcription factor 23
CENPJ	centromere protein J			NR1H2	nuclear receptor subfamily 1, group H, member 2					TCL1B	T-cell leukemia/lymphoma 1B
CENPM	centromere protein M			NR2E1	nuclear receptor subfamily 2, group E, member 1					TCOF1	Treacher Collins-Franceschetti syndrome 1
CENPO	centromere protein O			NR2F6	nuclear receptor subfamily 2, group F, member 6					TCP10	t-complex 10
CENPP	centromere protein P			NR4A3	nuclear receptor subfamily 4, group A, member 3					TCP10L	t-complex 10-like
CEP128	centrosomal protein 128kDa			NR5A1	nuclear receptor subfamily 5, group A, member 1					TCP10L2	t-complex 10-like 2
CEP164	centrosomal protein 164kDa			NRG2	neuregulin 2					TCTA	T-cell leukemia translocation altered
CEP170B	centrosomal protein 170B			NRG3	neuregulin 3					TCTE1	t-complex-associated-testis-expressed 1
CEP57L1	centrosomal protein 57kDa-like 1			NRGN	neurogranin (protein kinase C substrate, RC3)					TDG	thymine-DNA glycosylase
CEP85	centrosomal protein 85kDa			NRP1	neuropilin 1					TDRKH	tudor and KH domain containing
CEP85L	centrosomal protein 85kDa-like			NSD1	nuclear receptor binding SET domain protein 1					TDRP	testis development related protein
CEP89	centrosomal protein 89kDa			NSG2	Neuron-specific protein family member 2					TEAD1	TEA domain family member 1 (SV40 transcriptional enhancer factor)
CERCAM	cerebral endothelial cell adhesion molecule			NSL1	NSL1, MIS12 kinetochore complex component					TEAD3	TEA domain family member 3
CERS3	ceramide synthase 3			NSMCE1	non-SMC element 1 homolog (S. cerevisiae)					TECPR2	tectonin beta-propeller repeat containing 2
CES3	carboxylesterase 3			NSMF	NMDA receptor synaptonuclear signaling and neuronal migration factor					TECTB	tectorin beta
CES4A	carboxylesterase 4A			NSUN5	NOP2/Sun domain family, member 5					TEDDM1	transmembrane epididymal protein 1
CFL2	cofilin 2 (muscle)			NT5C1A	5'-nucleotidase, cytosolic IA					TEKT1	tektin 1
CGNL1	cingulin-like 1			NT5DC1	5'-nucleotidase domain containing 1					TENM4	teneurin transmembrane protein 4
CHAC1	ChaC, cation transport regulator homolog 1 (E. coli)			NT5DC3	5'-nucleotidase domain containing 3					TET3	tet methylcytosine dioxygenase 3
CHAD	chondroadherin			NTM	neurotrimin					TEX13B	testis expressed 13B
CHCHD1	coiled-coil-helix-coiled-coil-helix domain containing 1			NTMT1	N-terminal Xaa-Pro-Lys N-methyltransferase 1					TEX19	testis expressed 19
CHD3	chromodomain helicase DNA binding protein 3			NTNG2	netrin G2					TEX22	testis expressed 22
CHD5	chromodomain helicase DNA binding protein 5			NTPCR	nucleoside-triphosphatase, cancer-related					TEX35	testis expressed 35
CHD7	chromodomain helicase DNA binding protein 7			NTSR1	neurotensin receptor 1 (high affinity)					TFCP2	transcription factor CP2
CHEK1	checkpoint kinase 1			NTSR2	neurotensin receptor 2					TFCP2L1	transcription factor CP2-like 1
CHI3L1	chitinase 3-like 1 (cartilage glycoprotein-39)			NUAK2	NUAK family, SNF1-like kinase, 2					TFDP2	transcription factor Dp-2 (E2F dimerization partner 2)
CHKB	choline kinase beta			NUCB1	nucleobindin 1					TFE3	transcription factor binding to IGHM enhancer 3
CHMP3	charged multivesicular body protein 3			NUCKS1	nuclear casein kinase and cyclin-dependent kinase substrate 1					TFEC	transcription factor EC
CHP1	calcineurin-like EF-hand protein 1			NUDCD2	NudC domain containing 2					TFRC	transferrin receptor
CHRDL1	chordin-like 1			NUDCD3	NudC domain containing 3					TGFBI	transforming growth factor, beta-induced, 68kDa
CHRFAM7A	CHRNA7 (cholinergic receptor, nicotinic, alpha 7, exons 5-10) and FAM7A (family with sequence similarity 7A, exons A-E) fusion			NUDT16	nudix (nucleoside diphosphate linked moiety X)-type motif 16					TGFBR2	transforming growth factor, beta receptor II (70/80kDa)
CHRM1	cholinergic receptor, muscarinic 1			NUDT16L1	nudix (nucleoside diphosphate linked moiety X)-type motif 16-like 1					TGFBR3	transforming growth factor, beta receptor III
CHRM2	cholinergic receptor, muscarinic 2			NUDT17	nudix (nucleoside diphosphate linked moiety X)-type motif 17					TGFBRAP1	transforming growth factor, beta receptor associated protein 1
CHRNA2	cholinergic receptor, nicotinic, alpha 2 (neuronal)			NUDT3	nudix (nucleoside diphosphate linked moiety X)-type motif 3					TGIF2	TGFB-induced factor homeobox 2
CHRNA3	cholinergic receptor, nicotinic, alpha 3 (neuronal)			NUDT4	nudix (nucleoside diphosphate linked moiety X)-type motif 4					TGM2	transglutaminase 2
CHRNA4	cholinergic receptor, nicotinic, alpha 4 (neuronal)			NUF2	NUF2, NDC80 kinetochore complex component					TGS1	trimethylguanosine synthase 1
CHRNA7	cholinergic receptor, nicotinic, alpha 7 (neuronal)			NUGGC	nuclear GTPase, germinal center associated					THAP4	THAP domain containing 4
CHRNB2	cholinergic receptor, nicotinic, beta 2 (neuronal)			NUP133	nucleoporin 133kDa					THAP8	THAP domain containing 8
CHRNB3	cholinergic receptor, nicotinic, beta 3 (neuronal)			NUP210	nucleoporin 210kDa					THBD	thrombomodulin
CHRNG	cholinergic receptor, nicotinic, gamma (muscle)			NUP214	nucleoporin 214kDa					THBS2	thrombospondin 2
CHST12	carbohydrate (chondroitin 4) sulfotransferase 12			NUP62	nucleoporin 62kDa					THEM4	thioesterase superfamily member 4
CHST14	carbohydrate (N-acetylgalactosamine 4-0) sulfotransferase 14			NUP93	nucleoporin 93kDa					THEM6	thioesterase superfamily member 6
CHST15	carbohydrate (N-acetylgalactosamine 4-sulfate 6-O) sulfotransferase 15			NWD1	NACHT and WD repeat domain containing 1					THEMIS2	thymocyte selection associated family member 2
CHST4	carbohydrate (N-acetylglucosamine 6-O) sulfotransferase 4			NXF1	nuclear RNA export factor 1					THNSL1	threonine synthase-like 1 (S. cerevisiae)
CHST6	carbohydrate (N-acetylglucosamine 6-O) sulfotransferase 6			NXN	nucleoredoxin					THPO	thrombopoietin
CHSY1	chondroitin sulfate synthase 1			NXPH3	neurexophilin 3					THRB	thyroid hormone receptor, beta
CHTF8	CTF8, chromosome transmission fidelity factor 8 homolog (S. cerevisiae)			NXPH4	neurexophilin 4					THUMPD3	THUMP domain containing 3
CHURC1-FNTB	CHURC1-FNTB readthrough			NYAP1	neuronal tyrosine-phosphorylated phosphoinositide-3-kinase adaptor 1					THY1	Thy-1 cell surface antigen
CIAO1	cytosolic iron-sulfur protein assembly 1			NYNRIN	NYN domain and retroviral integrase containing					TIAF1	TGFB1-induced anti-apoptotic factor 1
CIB1	calcium and integrin binding 1 (calmyrin)			OBFC1	oligonucleotide/oligosaccharide-binding fold containing 1					TIAM1	T-cell lymphoma invasion and metastasis 1
CIITA	class II, major histocompatibility complex, transactivator			OBSCN	obscurin, cytoskeletal calmodulin and titin-interacting RhoGEF					TICRR	TOPBP1-interacting checkpoint and replication regulator
CISD2	CDGSH iron sulfur domain 2			ODC1	ornithine decarboxylase 1					TIFAB	TRAF-interacting protein with forkhead-associated domain, family member B
CISH	cytokine inducible SH2-containing protein			OGFOD1	2-oxoglutarate and iron-dependent oxygenase domain containing 1					TIGD2	tigger transposable element derived 2
CITED4	Cbp/p300-interacting transactivator, with Glu/Asp-rich carboxy-terminal domain, 4			OGFOD2	2-oxoglutarate and iron-dependent oxygenase domain containing 2					TIGD5	tigger transposable element derived 5
CKAP2L	cytoskeleton associated protein 2-like			OGT	O-linked N-acetylglucosamine (GlcNAc) transferase					TIMD4	T-cell immunoglobulin and mucin domain containing 4
CKAP5	cytoskeleton associated protein 5			OLA1	Obg-like ATPase 1					TIMM10B	translocase of inner mitochondrial membrane 10 homolog B (yeast)
CKS1B	CDC28 protein kinase regulatory subunit 1B			OLFML2A	olfactomedin-like 2A					TIMM13	translocase of inner mitochondrial membrane 13 homolog (yeast)
CLCC1	chloride channel CLIC-like 1			OMP	olfactory marker protein					TIMM50	translocase of inner mitochondrial membrane 50 homolog (S. cerevisiae)
CLCF1	cardiotrophin-like cytokine factor 1			ONECUT2	one cut homeobox 2					TIMM8A	translocase of inner mitochondrial membrane 8 homolog A (yeast)
CLCN2	chloride channel, voltage-sensitive 2			ONECUT3	one cut homeobox 3					TIMP2	TIMP metallopeptidase inhibitor 2
CLCN3	chloride channel, voltage-sensitive 3			OPA1	optic atrophy 1 (autosomal dominant)					TIRAP	toll-interleukin 1 receptor (TIR) domain containing adaptor protein
CLCN5	chloride channel, voltage-sensitive 5			OPA3	optic atrophy 3 (autosomal recessive, with chorea and spastic paraplegia)					TK2	thymidine kinase 2, mitochondrial
CLCN6	chloride channel, voltage-sensitive 6			OPALIN	oligodendrocytic myelin paranodal and inner loop protein					TKTL1	transketolase-like 1
CLCN7	chloride channel, voltage-sensitive 7			OPCML	opioid binding protein/cell adhesion molecule-like					TLDC2	TBC/LysM-associated domain containing 2
CLDN11	claudin 11			OPN1MW	opsin 1 (cone pigments), medium-wave-sensitive					TLL1	tolloid-like 1
CLDN12	claudin 12			OPN1MW2	opsin 1 (cone pigments), medium-wave-sensitive 2					TLN1	talin 1
CLDN18	claudin 18			OPN4	opsin 4					TLN2	talin 2
CLDN2	claudin 2			OPRK1	opioid receptor, kappa 1					TLR4	toll-like receptor 4
CLDN23	claudin 23			OPRL1	opiate receptor-like 1					TLR8	toll-like receptor 8
CLEC12B	C-type lectin domain family 12, member B			OR2A4	olfactory receptor, family 2, subfamily A, member 4					TLX1	T-cell leukemia homeobox 1
CLEC16A	C-type lectin domain family 16, member A			OR9A2	olfactory receptor, family 9, subfamily A, member 2					TLX2	T-cell leukemia homeobox 2
CLEC17A	C-type lectin domain family 17, member A			OR9Q1	olfactory receptor, family 9, subfamily Q, member 1					TM2D1	TM2 domain containing 1
CLEC1A	C-type lectin domain family 1, member A			ORAI1	ORAI calcium release-activated calcium modulator 1					TM4SF20	transmembrane 4 L six family member 20
CLEC3B	C-type lectin domain family 3, member B			ORAI2	ORAI calcium release-activated calcium modulator 2					TM6SF2	transmembrane 6 superfamily member 2
CLEC4F	C-type lectin domain family 4, member F			ORAOV1	oral cancer overexpressed 1					TM7SF2	transmembrane 7 superfamily member 2
CLEC4M	C-type lectin domain family 4, member M			ORC4	origin recognition complex, subunit 4					TM9SF4	transmembrane 9 superfamily protein member 4
CLEC5A	C-type lectin domain family 5, member A			ORC5	origin recognition complex, subunit 5					TMBIM6	transmembrane BAX inhibitor motif containing 6
CLHC1	clathrin heavy chain linker domain containing 1			ORMDL3	ORM1-like 3 (S. cerevisiae)					TMC2	transmembrane channel-like 2
CLIC5	chloride intracellular channel 5			OSBP	oxysterol binding protein					TMC6	transmembrane channel-like 6
CLMN	calmin (calponin-like, transmembrane)			OSBP2	oxysterol binding protein 2					TMC8	transmembrane channel-like 8
CLOCK	clock circadian regulator			OSBPL10	oxysterol binding protein-like 10					TMCC1	transmembrane and coiled-coil domain family 1
CLPB	ClpB caseinolytic peptidase B homolog (E. coli)			OSBPL2	oxysterol binding protein-like 2					TMCC2	transmembrane and coiled-coil domain family 2
CLPP	caseinolytic mitochondrial matrix peptidase proteolytic subunit			OSBPL3	oxysterol binding protein-like 3					TMCO1	transmembrane and coiled-coil domains 1
CLPSL1	colipase-like 1			OSBPL5	oxysterol binding protein-like 5					TMED1	transmembrane emp24 protein transport domain containing 1
CLSTN2	calsyntenin 2			OSBPL8	oxysterol binding protein-like 8					TMED3	transmembrane emp24 protein transport domain containing 3
CLTA	clathrin, light chain A			OSGIN2	oxidative stress induced growth inhibitor family member 2					TMED8	transmembrane emp24 protein transport domain containing 8
CLYBL	citrate lyase beta like			OSTF1	osteoclast stimulating factor 1					TMEM104	transmembrane protein 104
CMBL	carboxymethylenebutenolidase homolog (Pseudomonas)			OTOP3	otopetrin 3					TMEM106A	transmembrane protein 106A
CMC1	COX assembly mitochondrial protein 1 homolog (S. cerevisiae)			OTUB2	OTU domain, ubiquitin aldehyde binding 2					TMEM106C	transmembrane protein 106C
CMKLR1	chemokine-like receptor 1			OTUD3	OTU domain containing 3					TMEM110	transmembrane protein 110
CMPK2	cytidine monophosphate (UMP-CMP) kinase 2, mitochondrial			OTX1	orthodenticle homeobox 1					TMEM115	transmembrane protein 115
CMTM3	CKLF-like MARVEL transmembrane domain containing 3			OXNAD1	oxidoreductase NAD-binding domain containing 1					TMEM120B	transmembrane protein 120B
CMTM4	CKLF-like MARVEL transmembrane domain containing 4			OXSR1	oxidative stress responsive 1					TMEM132A	transmembrane protein 132A
CNDP2	CNDP dipeptidase 2 (metallopeptidase M20 family)			P2RX1	purinergic receptor P2X, ligand-gated ion channel, 1					TMEM132B	transmembrane protein 132B
CNGA3	cyclic nucleotide gated channel alpha 3			P2RX6	purinergic receptor P2X, ligand-gated ion channel, 6					TMEM132D	transmembrane protein 132D
CNIH1	cornichon family AMPA receptor auxiliary protein 1			P2RX7	purinergic receptor P2X, ligand-gated ion channel, 7					TMEM14E	transmembrane protein 14E
CNKSR3	CNKSR family member 3			P2RY8	purinergic receptor P2Y, G-protein coupled, 8					TMEM150C	transmembrane protein 150C
CNN2	calponin 2			PABPN1	poly(A) binding protein, nuclear 1					TMEM151B	transmembrane protein 151B
CNNM2	cyclin M2			PACRGL	PARK2 co-regulated-like					TMEM154	transmembrane protein 154
CNOT8	CCR4-NOT transcription complex, subunit 8			PACS1	phosphofurin acidic cluster sorting protein 1					TMEM159	transmembrane protein 159
CNPPD1	cyclin Pas1/PHO80 domain containing 1			PACS2	phosphofurin acidic cluster sorting protein 2					TMEM164	transmembrane protein 164
CNR2	cannabinoid receptor 2 (macrophage)			PACSIN1	protein kinase C and casein kinase substrate in neurons 1					TMEM167A	transmembrane protein 167A
CNTD1	cyclin N-terminal domain containing 1			PACSIN2	protein kinase C and casein kinase substrate in neurons 2					TMEM168	transmembrane protein 168
CNTD2	cyclin N-terminal domain containing 2			PADI2	peptidyl arginine deiminase, type II					TMEM170A	transmembrane protein 170A
CNTFR	ciliary neurotrophic factor receptor			PAGR1	PAXIP1-associated glutamate-rich protein 1					TMEM170B	transmembrane protein 170B
CNTN2	contactin 2 (axonal)			PAICS	phosphoribosylaminoimidazole carboxylase, phosphoribosylaminoimidazole succinocarboxamide synthetase					TMEM173	transmembrane protein 173
CNTNAP1	contactin associated protein 1			PAIP2B	poly(A) binding protein interacting protein 2B					TMEM180	transmembrane protein 180
CNTNAP3	contactin associated protein-like 3			PAK1	p21 protein (Cdc42/Rac)-activated kinase 1					TMEM181	transmembrane protein 181
CNTNAP3B	contactin associated protein-like 3B			PAK4	p21 protein (Cdc42/Rac)-activated kinase 4					TMEM184A	transmembrane protein 184A
CNTNAP5	contactin associated protein-like 5			PALM	paralemmin					TMEM184B	transmembrane protein 184B
CNTROB	centrobin, centrosomal BRCA2 interacting protein			PANK2	pantothenate kinase 2					TMEM185B	transmembrane protein 185B
COA4	cytochrome c oxidase assembly factor 4 homolog (S. cerevisiae)			PANK4	pantothenate kinase 4					TMEM189	transmembrane protein 189
COA5	cytochrome c oxidase assembly factor 5			PANX1	pannexin 1					TMEM189-UBE2V1	TMEM189-UBE2V1 readthrough
COG6	component of oligomeric golgi complex 6			PAOX	polyamine oxidase (exo-N4-amino)					TMEM19	transmembrane protein 19
COG8	component of oligomeric golgi complex 8			PAPD5	PAP associated domain containing 5					TMEM194A	transmembrane protein 194A
COL12A1	collagen, type XII, alpha 1			PAPLN	papilin, proteoglycan-like sulfated glycoprotein					TMEM201	transmembrane protein 201
COL20A1	collagen, type XX, alpha 1			PAPPA	pregnancy-associated plasma protein A, pappalysin 1					TMEM207	transmembrane protein 207
COL23A1	collagen, type XXIII, alpha 1			PAPPA2	pappalysin 2					TMEM209	transmembrane protein 209
COL5A3	collagen, type V, alpha 3			PAQR4	progestin and adipoQ receptor family member IV					TMEM213	transmembrane protein 213
COLEC10	collectin sub-family member 10 (C-type lectin)			PARD3B	par-3 family cell polarity regulator beta					TMEM214	transmembrane protein 214
COLGALT2	collagen beta(1-O)galactosyltransferase 2			PARD6B	par-6 family cell polarity regulator beta					TMEM216	transmembrane protein 216
COMT	catechol-O-methyltransferase			PARD6G	par-6 family cell polarity regulator gamma					TMEM229B	transmembrane protein 229B
COMTD1	catechol-O-methyltransferase domain containing 1			PARL	presenilin associated, rhomboid-like					TMEM233	transmembrane protein 233
COQ10A	coenzyme Q10 homolog A (S. cerevisiae)			PARP11	poly (ADP-ribose) polymerase family, member 11					TMEM239	transmembrane protein 239
COQ7	coenzyme Q7 homolog, ubiquinone (yeast)			PARP16	poly (ADP-ribose) polymerase family, member 16					TMEM242	transmembrane protein 242
CORO1B	coronin, actin binding protein, 1B			PARVB	parvin, beta					TMEM252	transmembrane protein 252
CORO1C	coronin, actin binding protein, 1C			PATE4	prostate and testis expressed 4					TMEM256-PLSCR3	TMEM256-PLSCR3 readthrough (NMD candidate)
CORO2A	coronin, actin binding protein, 2A			PAWR	PRKC, apoptosis, WT1, regulator					TMEM259	transmembrane protein 259
CORO2B	coronin, actin binding protein, 2B			PAX2	paired box 2					TMEM261	transmembrane protein 261
CORO6	coronin 6			PAX3	paired box 3					TMEM30A	transmembrane protein 30A
CORO7	coronin 7			PAX5	paired box 5					TMEM33	transmembrane protein 33
COX10	cytochrome c oxidase assembly homolog 10 (yeast)			PAXIP1-AS2	PAXIP1 antisense RNA 2					TMEM35	transmembrane protein 35
COX15	cytochrome c oxidase assembly homolog 15 (yeast)			PBRM1	polybromo 1					TMEM37	transmembrane protein 37
COX4I2	cytochrome c oxidase subunit IV isoform 2 (lung)			PBXIP1	pre-B-cell leukemia homeobox interacting protein 1					TMEM52	transmembrane protein 52
COX6B2	cytochrome c oxidase subunit VIb polypeptide 2 (testis)			PCBD2	pterin-4 alpha-carbinolamine dehydratase/dimerization cofactor of hepatocyte nuclear factor 1 alpha (TCF1) 2					TMEM53	transmembrane protein 53
COX7B	cytochrome c oxidase subunit VIIb			PCDH1	protocadherin 1					TMEM59	transmembrane protein 59
CPD	carboxypeptidase D			PCDH11X	protocadherin 11 X-linked					TMEM63B	transmembrane protein 63B
CPEB2	cytoplasmic polyadenylation element binding protein 2			PCDH11Y	protocadherin 11 Y-linked					TMEM63C	transmembrane protein 63C
CPLX3	complexin 3			PCDHB16	protocadherin beta 16					TMEM75	transmembrane protein 75
CPNE2	copine II			PCDHB17	Protocadherin-psi1; Uncharacterized protein					TMEM79	transmembrane protein 79
CPSF2	cleavage and polyadenylation specific factor 2, 100kDa			PCDHB2	protocadherin beta 2					TMEM80	transmembrane protein 80
CPXM2	carboxypeptidase X (M14 family), member 2			PCDHB3	protocadherin beta 3					TMEM82	transmembrane protein 82
CR2	complement component (3d/Epstein Barr virus) receptor 2			PCDHB6	protocadherin beta 6					TMEM86A	transmembrane protein 86A
CRCP	CGRP receptor component			PCDHGA1	protocadherin gamma subfamily A, 1					TMEM99	transmembrane protein 99
CREB5	cAMP responsive element binding protein 5			PCDHGA10	protocadherin gamma subfamily A, 10					TMEM9B	TMEM9 domain family, member B
CREBZF	CREB/ATF bZIP transcription factor			PCDHGA11	protocadherin gamma subfamily A, 11					TMPPE	transmembrane protein with metallophosphoesterase domain
CRELD1	cysteine-rich with EGF-like domains 1			PCDHGA12	protocadherin gamma subfamily A, 12					TMPRSS11BNL	TMPRSS11B N-terminal like
CRIPT	cysteine-rich PDZ-binding protein			PCDHGA2	protocadherin gamma subfamily A, 2					TMPRSS3	transmembrane protease, serine 3
CRISPLD2	cysteine-rich secretory protein LCCL domain containing 2			PCDHGA3	protocadherin gamma subfamily A, 3					TMPRSS4	transmembrane protease, serine 4
CRKL	v-crk avian sarcoma virus CT10 oncogene homolog-like			PCDHGA4	protocadherin gamma subfamily A, 4					TMPRSS6	transmembrane protease, serine 6
CRLS1	cardiolipin synthase 1			PCDHGA5	protocadherin gamma subfamily A, 5					TMTC4	transmembrane and tetratricopeptide repeat containing 4
CRMP1	collapsin response mediator protein 1			PCDHGA6	protocadherin gamma subfamily A, 6					TMUB2	transmembrane and ubiquitin-like domain containing 2
CROT	carnitine O-octanoyltransferase			PCDHGA7	protocadherin gamma subfamily A, 7					TMX4	thioredoxin-related transmembrane protein 4
CRP	C-reactive protein, pentraxin-related			PCDHGA8	protocadherin gamma subfamily A, 8					TNF	tumor necrosis factor
CRTAP	cartilage associated protein			PCDHGA9	protocadherin gamma subfamily A, 9					TNFAIP2	tumor necrosis factor, alpha-induced protein 2
CRTC1	CREB regulated transcription coactivator 1			PCDHGB1	protocadherin gamma subfamily B, 1					TNFAIP8L3	tumor necrosis factor, alpha-induced protein 8-like 3
CRX	cone-rod homeobox			PCDHGB2	protocadherin gamma subfamily B, 2					TNFRSF10B	tumor necrosis factor receptor superfamily, member 10b
CRY2	cryptochrome 2 (photolyase-like)			PCDHGB3	protocadherin gamma subfamily B, 3					TNFRSF10D	tumor necrosis factor receptor superfamily, member 10d, decoy with truncated death domain
CSDC2	cold shock domain containing C2, RNA binding			PCDHGB4	protocadherin gamma subfamily B, 4					TNFRSF12A	tumor necrosis factor receptor superfamily, member 12A
CSE1L	CSE1 chromosome segregation 1-like (yeast)			PCDHGB6	protocadherin gamma subfamily B, 6					TNFRSF13C	tumor necrosis factor receptor superfamily, member 13C
CSF1R	colony stimulating factor 1 receptor			PCDHGB7	protocadherin gamma subfamily B, 7					TNFSF12-TNFSF13	TNFSF12-TNFSF13 readthrough
CSF3	colony stimulating factor 3 (granulocyte)			PCDHGC3	protocadherin gamma subfamily C, 3					TNFSF13	tumor necrosis factor (ligand) superfamily, member 13
CSK	c-src tyrosine kinase			PCDHGC4	protocadherin gamma subfamily C, 4					TNFSF4	tumor necrosis factor (ligand) superfamily, member 4
CSNK1D	casein kinase 1, delta			PCDHGC5	protocadherin gamma subfamily C, 5					TNFSF8	tumor necrosis factor (ligand) superfamily, member 8
CSNK2A1	casein kinase 2, alpha 1 polypeptide			PCGF3	polycomb group ring finger 3					TNIP1	TNFAIP3 interacting protein 1
CSRNP2	cysteine-serine-rich nuclear protein 2			PCLO	piccolo presynaptic cytomatrix protein					TNKS	tankyrase, TRF1-interacting ankyrin-related ADP-ribose polymerase
CST3	cystatin C			PCNP	PEST proteolytic signal containing nuclear protein					TNMD	tenomodulin
CST7	cystatin F (leukocystatin)			PCNT	pericentrin					TNNI1	troponin I type 1 (skeletal, slow)
CST9	cystatin 9 (testatin)			PCNX	pecanex homolog (Drosophila)					TNPO1	transportin 1
CSTB	cystatin B (stefin B)			PCNXL2	pecanex-like 2 (Drosophila)					TNPO2	transportin 2
CSTF2	cleavage stimulation factor, 3' pre-RNA, subunit 2, 64kDa			PCP4L1	Purkinje cell protein 4 like 1					TNPO3	transportin 3
CTB-167G5.5	Uncharacterized protein			PCSK2	proprotein convertase subtilisin/kexin type 2					TNR	tenascin R
CTB-54O9.9	Uncharacterized protein			PCSK7	proprotein convertase subtilisin/kexin type 7					TNRC6A	trinucleotide repeat containing 6A
CTC-349C3.1	Homo sapiens uncharacterized LOC100996485 (LOC100996485), mRNA.			PCYT1A	phosphate cytidylyltransferase 1, choline, alpha					TNRC6B	trinucleotide repeat containing 6B
CTC-432M15.3	Folliculin-interacting protein 1			PDCD1	programmed cell death 1					TNRC6C	trinucleotide repeat containing 6C
CTCF	CCCTC-binding factor (zinc finger protein)			PDCD11	programmed cell death 11					TNS1	tensin 1
CTD-2207O23.12	Uncharacterized protein			PDDC1	Parkinson disease 7 domain containing 1					TNS4	tensin 4
CTD-2210P24.4	Uncharacterized protein			PDE10A	phosphodiesterase 10A					TOLLIP	toll interacting protein
CTD-2267D19.3	Uncharacterized protein			PDE11A	phosphodiesterase 11A					TOM1	target of myb1 (chicken)
CTD-3074O7.11	Bardet-Biedl syndrome 1 protein			PDE12	phosphodiesterase 12					TOM1L2	target of myb1-like 2 (chicken)
CTDNEP1	CTD nuclear envelope phosphatase 1			PDE3A	phosphodiesterase 3A, cGMP-inhibited					TOMM40	translocase of outer mitochondrial membrane 40 homolog (yeast)
CTDSP2	CTD (carboxy-terminal domain, RNA polymerase II, polypeptide A) small phosphatase 2			PDE4C	phosphodiesterase 4C, cAMP-specific					TOMM40L	translocase of outer mitochondrial membrane 40 homolog (yeast)-like
CTF1	cardiotrophin 1			PDE4D	phosphodiesterase 4D, cAMP-specific					TOP1	topoisomerase (DNA) I
CTGF	connective tissue growth factor			PDE7B	phosphodiesterase 7B					TOR2A	torsin family 2, member A
CTH	cystathionase (cystathionine gamma-lyase)			PDF	peptide deformylase (mitochondrial)					TP53BP2	tumor protein p53 binding protein, 2
CTIF	CBP80/20-dependent translation initiation factor			PDGFB	platelet-derived growth factor beta polypeptide					TP53I11	tumor protein p53 inducible protein 11
CTNNBL1	catenin, beta like 1			PDHB	pyruvate dehydrogenase (lipoamide) beta					TP53RK	TP53 regulating kinase
CTNND1	catenin (cadherin-associated protein), delta 1			PDIK1L	PDLIM1 interacting kinase 1 like					TP63	tumor protein p63
CTNS	cystinosin, lysosomal cystine transporter			PDK1	pyruvate dehydrogenase kinase, isozyme 1					TPBG	trophoblast glycoprotein
CTPS2	CTP synthase 2			PDK3	pyruvate dehydrogenase kinase, isozyme 3					TPCN1	two pore segment channel 1
CTRB1	chymotrypsinogen B1			PDK4	pyruvate dehydrogenase kinase, isozyme 4					TPD52L2	tumor protein D52-like 2
CTRC	chymotrypsin C (caldecrin)			PDLIM4	PDZ and LIM domain 4					TPD52L3	tumor protein D52-like 3
CTSO	cathepsin O			PDPK1	3-phosphoinositide dependent protein kinase-1					TPGS1	tubulin polyglutamylase complex subunit 1
CTSV	cathepsin V			PDPN	podoplanin					TPGS2	tubulin polyglutamylase complex subunit 2
CTTN	cortactin			PDPR	pyruvate dehydrogenase phosphatase regulatory subunit					TPPP	tubulin polymerization promoting protein
CTTNBP2NL	CTTNBP2 N-terminal like			PDS5A	PDS5, regulator of cohesion maintenance, homolog A (S. cerevisiae)					TPPP3	tubulin polymerization-promoting protein family member 3
CUL3	cullin 3			PDXK	pyridoxal (pyridoxine, vitamin B6) kinase					TPRA1	transmembrane protein, adipocyte asscociated 1
CUL5	cullin 5			PDZD4	PDZ domain containing 4					TPRG1	tumor protein p63 regulated 1
CWF19L1	CWF19-like 1, cell cycle control (S. pombe)			PEAK1	pseudopodium-enriched atypical kinase 1					TPST2	tyrosylprotein sulfotransferase 2
CX3CL1	chemokine (C-X3-C motif) ligand 1			PEAR1	platelet endothelial aggregation receptor 1					TPX2	TPX2, microtubule-associated
CXADR	coxsackie virus and adenovirus receptor			PEG10	paternally expressed 10					TRABD2B	TraB domain containing 2B
CXCL13	chemokine (C-X-C motif) ligand 13			PELI1	pellino E3 ubiquitin protein ligase 1					TRADD	TNFRSF1A-associated via death domain
CXCL14	chemokine (C-X-C motif) ligand 14			PELI3	pellino E3 ubiquitin protein ligase family member 3					TRAF1	TNF receptor-associated factor 1
CXCL9	chemokine (C-X-C motif) ligand 9			PELO	pelota homolog (Drosophila)					TRAF3	TNF receptor-associated factor 3
CXCR2	chemokine (C-X-C motif) receptor 2			PER2	period circadian clock 2					TRAF7	TNF receptor-associated factor 7, E3 ubiquitin protein ligase
CXorf22	chromosome X open reading frame 22			PER3	period circadian clock 3					TRAIP	TRAF interacting protein
CXorf36	chromosome X open reading frame 36			PERP	PERP, TP53 apoptosis effector					TRAPPC2L	trafficking protein particle complex 2-like
CXorf57	chromosome X open reading frame 57			PEX11A	peroxisomal biogenesis factor 11 alpha					TRDMT1	tRNA aspartic acid methyltransferase 1
CXXC1	CXXC finger protein 1			PEX11B	peroxisomal biogenesis factor 11 beta					TREML2	triggering receptor expressed on myeloid cells-like 2
CYB561A3	cytochrome b561 family, member A3			PEX12	peroxisomal biogenesis factor 12					TRIM11	tripartite motif containing 11
CYB561D1	cytochrome b561 family, member D1			PEX2	peroxisomal biogenesis factor 2					TRIM15	tripartite motif containing 15
CYB5D1	cytochrome b5 domain containing 1			PEX26	peroxisomal biogenesis factor 26					TRIM24	tripartite motif containing 24
CYB5R3	cytochrome b5 reductase 3			PEX5L	peroxisomal biogenesis factor 5-like					TRIM25	tripartite motif containing 25
CYB5R4	cytochrome b5 reductase 4			PFDN1	prefoldin subunit 1					TRIM35	tripartite motif containing 35
CYP11B1	cytochrome P450, family 11, subfamily B, polypeptide 1			PFKFB3	6-phosphofructo-2-kinase/fructose-2,6-biphosphatase 3					TRIM41	tripartite motif containing 41
CYP11B2	cytochrome P450, family 11, subfamily B, polypeptide 2			PGAP2	post-GPI attachment to proteins 2					TRIM44	tripartite motif containing 44
CYP1A2	cytochrome P450, family 1, subfamily A, polypeptide 2			PGAP3	post-GPI attachment to proteins 3					TRIM66	tripartite motif containing 66
CYP1B1	cytochrome P450, family 1, subfamily B, polypeptide 1			PGBD4	piggyBac transposable element derived 4					TRIM67	tripartite motif containing 67
CYP20A1	cytochrome P450, family 20, subfamily A, polypeptide 1			PGLS	6-phosphogluconolactonase					TRIM7	tripartite motif containing 7
CYP26B1	cytochrome P450, family 26, subfamily B, polypeptide 1			PGLYRP2	peptidoglycan recognition protein 2					TRIM72	tripartite motif containing 72
CYP2C19	cytochrome P450, family 2, subfamily C, polypeptide 19			PGM2	phosphoglucomutase 2					TRIM8	tripartite motif containing 8
CYP2S1	cytochrome P450, family 2, subfamily S, polypeptide 1			PGP	phosphoglycolate phosphatase					TRIOBP	TRIO and F-actin binding protein
CYP4F11	cytochrome P450, family 4, subfamily F, polypeptide 11			PGR	progesterone receptor					TRIP12	thyroid hormone receptor interactor 12
CYP4F12	cytochrome P450, family 4, subfamily F, polypeptide 12			PGS1	phosphatidylglycerophosphate synthase 1					TRIP13	thyroid hormone receptor interactor 13
CYP4F31P	cytochrome P450, family 4, subfamily F, polypeptide 31, pseudogene			PHACTR2	phosphatase and actin regulator 2					TRIP4	thyroid hormone receptor interactor 4
CYP51A1	cytochrome P450, family 51, subfamily A, polypeptide 1			PHB2	prohibitin 2					TRIT1	tRNA isopentenyltransferase 1
CYSLTR2	cysteinyl leukotriene receptor 2			PHC2	polyhomeotic homolog 2 (Drosophila)					TRMT10A	tRNA methyltransferase 10 homolog A (S. cerevisiae)
CYTH1	cytohesin 1			PHF15	PHD finger protein 15					TRMT10B	tRNA methyltransferase 10 homolog B (S. cerevisiae)
CYTH2	cytohesin 2			PHF17	PHD finger protein 17					TRMT12	tRNA methyltransferase 12 homolog (S. cerevisiae)
CYTH3	cytohesin 3			PHF21A	PHD finger protein 21A					TRMT61A	tRNA methyltransferase 61 homolog A (S. cerevisiae)
DAB1	Dab, reelin signal transducer, homolog 1 (Drosophila)			PHF23	PHD finger protein 23					TRMU	tRNA 5-methylaminomethyl-2-thiouridylate methyltransferase
DAB2	Dab, mitogen-responsive phosphoprotein, homolog 2 (Drosophila)			PHF8	PHD finger protein 8					TROAP	trophinin associated protein
DAB2IP	DAB2 interacting protein			PHIP	pleckstrin homology domain interacting protein					TRPC4AP	transient receptor potential cation channel, subfamily C, member 4 associated protein
DAG1	dystroglycan 1 (dystrophin-associated glycoprotein 1)			PHKA2	phosphorylase kinase, alpha 2 (liver)					TRPC5	transient receptor potential cation channel, subfamily C, member 5
DAGLA	diacylglycerol lipase, alpha			PHKG2	phosphorylase kinase, gamma 2 (testis)					TRPM6	transient receptor potential cation channel, subfamily M, member 6
DAK	dihydroxyacetone kinase 2 homolog (S. cerevisiae)			PHLDA1	pleckstrin homology-like domain, family A, member 1					TRPM7	transient receptor potential cation channel, subfamily M, member 7
DAP	death-associated protein			PHLDA3	pleckstrin homology-like domain, family A, member 3					TRPS1	trichorhinophalangeal syndrome I
DBNL	drebrin-like			PHTF2	putative homeodomain transcription factor 2					TRPV1	transient receptor potential cation channel, subfamily V, member 1
DBP	D site of albumin promoter (albumin D-box) binding protein			PHYHIP	phytanoyl-CoA 2-hydroxylase interacting protein					TRPV3	transient receptor potential cation channel, subfamily V, member 3
DCAF10	DDB1 and CUL4 associated factor 10			PIAS3	protein inhibitor of activated STAT, 3					TRPV4	transient receptor potential cation channel, subfamily V, member 4
DCAF11	DDB1 and CUL4 associated factor 11			PIAS4	protein inhibitor of activated STAT, 4					TRUB2	TruB pseudouridine (psi) synthase family member 2
DCAF7	DDB1 and CUL4 associated factor 7			PIEZO2	piezo-type mechanosensitive ion channel component 2					TSC22D3	TSC22 domain family, member 3
DCDC2	doublecortin domain containing 2			PIGA	phosphatidylinositol glycan anchor biosynthesis, class A					TSEN2	TSEN2 tRNA splicing endonuclease subunit
DCLRE1C	DNA cross-link repair 1C			PIGF	phosphatidylinositol glycan anchor biosynthesis, class F					TSFM	Ts translation elongation factor, mitochondrial
DCN	decorin			PIGG	phosphatidylinositol glycan anchor biosynthesis, class G					TSHR	thyroid stimulating hormone receptor
DCP1A	decapping mRNA 1A			PIGP	phosphatidylinositol glycan anchor biosynthesis, class P					TSHZ1	teashirt zinc finger homeobox 1
DCPS	decapping enzyme, scavenger			PIGQ	phosphatidylinositol glycan anchor biosynthesis, class Q					TSKU	tsukushi, small leucine rich proteoglycan
DCSTAMP	dendrocyte expressed seven transmembrane protein			PIGS	phosphatidylinositol glycan anchor biosynthesis, class S					TSNARE1	t-SNARE domain containing 1
DCT	dopachrome tautomerase			PIGV	phosphatidylinositol glycan anchor biosynthesis, class V					TSNAX	translin-associated factor X
DCTD	dCMP deaminase			PIK3C2A	phosphatidylinositol-4-phosphate 3-kinase, catalytic subunit type 2 alpha					TSPAN1	tetraspanin 1
DCTN5	dynactin 5 (p25)			PIK3C3	phosphatidylinositol 3-kinase, catalytic subunit type 3					TSPAN14	tetraspanin 14
DCTN6	dynactin 6			PIK3CA	phosphatidylinositol-4,5-bisphosphate 3-kinase, catalytic subunit alpha					TSPAN17	tetraspanin 17
DCX	doublecortin			PIK3CB	phosphatidylinositol-4,5-bisphosphate 3-kinase, catalytic subunit beta					TSPAN18	tetraspanin 18
DDAH2	dimethylarginine dimethylaminohydrolase 2			PIK3CD	phosphatidylinositol-4,5-bisphosphate 3-kinase, catalytic subunit delta					TSPAN31	tetraspanin 31
DDC	dopa decarboxylase (aromatic L-amino acid decarboxylase)			PIN1	peptidylprolyl cis/trans isomerase, NIMA-interacting 1					TSPAN33	tetraspanin 33
DDI1	DNA-damage inducible 1 homolog 1 (S. cerevisiae)			PIP4K2B	phosphatidylinositol-5-phosphate 4-kinase, type II, beta					TSPAN9	tetraspanin 9
DDN	dendrin			PITPNM2	phosphatidylinositol transfer protein, membrane-associated 2					TSPEAR	thrombospondin-type laminin G domain and EAR repeats
DDRGK1	DDRGK domain containing 1			PITPNM3	PITPNM family member 3					TSPO2	translocator protein 2
DDX11	DEAD/H (Asp-Glu-Ala-Asp/His) box helicase 11			PITX1	paired-like homeodomain 1					TSPYL1	TSPY-like 1
DDX18	DEAD (Asp-Glu-Ala-Asp) box polypeptide 18			PKD1	polycystic kidney disease 1 (autosomal dominant)					TSPYL4	TSPY-like 4
DDX19B	DEAD (Asp-Glu-Ala-Asp) box polypeptide 19B			PKDCC	protein kinase domain containing, cytoplasmic					TSR1	TSR1, 20S rRNA accumulation, homolog (S. cerevisiae)
DDX54	DEAD (Asp-Glu-Ala-Asp) box polypeptide 54			PKIA	protein kinase (cAMP-dependent, catalytic) inhibitor alpha					TSR2	TSR2, 20S rRNA accumulation, homolog (S. cerevisiae)
DDX58	DEAD (Asp-Glu-Ala-Asp) box polypeptide 58			PKMYT1	protein kinase, membrane associated tyrosine/threonine 1					TSSK1B	testis-specific serine kinase 1B
DDX6	DEAD (Asp-Glu-Ala-Asp) box helicase 6			PKN3	protein kinase N3					TSTD2	thiosulfate sulfurtransferase (rhodanese)-like domain containing 2
DENND2A	DENN/MADD domain containing 2A			PKP4	plakophilin 4					TTBK1	tau tubulin kinase 1
DENND6B	DENN/MADD domain containing 6B			PLA2G16	phospholipase A2, group XVI					TTBK2	tau tubulin kinase 2
DENR	density-regulated protein			PLA2G2C	phospholipase A2, group IIC					TTC26	tetratricopeptide repeat domain 26
DEPDC5	DEP domain containing 5			PLA2G2F	phospholipase A2, group IIF					TTC30A	tetratricopeptide repeat domain 30A
DERL3	derlin 3			PLA2G4B	phospholipase A2, group IVB (cytosolic)					TTC31	tetratricopeptide repeat domain 31
DES	desmin			PLA2G4C	phospholipase A2, group IVC (cytosolic, calcium-independent)					TTC37	tetratricopeptide repeat domain 37
DFFA	DNA fragmentation factor, 45kDa, alpha polypeptide			PLAC8	placenta-specific 8					TTC38	tetratricopeptide repeat domain 38
DGAT2	diacylglycerol O-acyltransferase 2			PLBD2	phospholipase B domain containing 2					TTC39A	tetratricopeptide repeat domain 39A
DGCR8	DGCR8 microprocessor complex subunit			PLCB3	phospholipase C, beta 3 (phosphatidylinositol-specific)					TTC39C	tetratricopeptide repeat domain 39C
DGKG	diacylglycerol kinase, gamma 90kDa			PLCE1	phospholipase C, epsilon 1					TTC4	tetratricopeptide repeat domain 4
DGKH	diacylglycerol kinase, eta			PLCG2	phospholipase C, gamma 2 (phosphatidylinositol-specific)					TTC5	tetratricopeptide repeat domain 5
DGKI	diacylglycerol kinase, iota			PLCXD1	phosphatidylinositol-specific phospholipase C, X domain containing 1					TTC7A	tetratricopeptide repeat domain 7A
DGKQ	diacylglycerol kinase, theta 110kDa			PLEK	pleckstrin					TTC9C	tetratricopeptide repeat domain 9C
DHCR24	24-dehydrocholesterol reductase			PLEKHA6	pleckstrin homology domain containing, family A member 6					TTF2	transcription termination factor, RNA polymerase II
DHCR7	7-dehydrocholesterol reductase			PLEKHA8	pleckstrin homology domain containing, family A (phosphoinositide binding specific) member 8					TTL	tubulin tyrosine ligase
DHODH	dihydroorotate dehydrogenase (quinone)			PLEKHB2	pleckstrin homology domain containing, family B (evectins) member 2					TTLL12	tubulin tyrosine ligase-like family, member 12
DHRS3	dehydrogenase/reductase (SDR family) member 3			PLEKHG4B	pleckstrin homology domain containing, family G (with RhoGef domain) member 4B					TTLL7	tubulin tyrosine ligase-like family, member 7
DHX33	DEAH (Asp-Glu-Ala-His) box polypeptide 33			PLEKHG5	pleckstrin homology domain containing, family G (with RhoGef domain) member 5					TTPAL	tocopherol (alpha) transfer protein-like
DHX34	DEAH (Asp-Glu-Ala-His) box polypeptide 34			PLEKHH2	pleckstrin homology domain containing, family H (with MyTH4 domain) member 2					TUB	tubby bipartite transcription factor
DIAPH1	diaphanous-related formin 1			PLEKHM2	pleckstrin homology domain containing, family M (with RUN domain) member 2					TUBD1	tubulin, delta 1
DIAPH2	diaphanous-related formin 2			PLEKHM3	pleckstrin homology domain containing, family M, member 3					TUBE1	tubulin, epsilon 1
DICER1	dicer 1, ribonuclease type III			PLEKHO2	pleckstrin homology domain containing, family O member 2					TUBGCP2	tubulin, gamma complex associated protein 2
DIEXF	digestive organ expansion factor homolog (zebrafish)			PLEKHS1	pleckstrin homology domain containing, family S member 1					TUFT1	tuftelin 1
DIO1	deiodinase, iodothyronine, type I			PLIN1	perilipin 1					TULP3	tubby like protein 3
DIP2C	DIP2 disco-interacting protein 2 homolog C (Drosophila)			PLIN3	perilipin 3					TULP4	tubby like protein 4
DIRAS2	DIRAS family, GTP-binding RAS-like 2			PLXDC1	plexin domain containing 1					TUSC1	tumor suppressor candidate 1
DISC1	disrupted in schizophrenia 1			PLXDC2	plexin domain containing 2					TUSC3	tumor suppressor candidate 3
DKC1	dyskeratosis congenita 1, dyskerin			PLXNA1	plexin A1					TUSC5	tumor suppressor candidate 5
DKFZP434E1119				PLXNA3	plexin A3					TVP23A	trans-golgi network vesicle protein 23 homolog A (S. cerevisiae)
DKFZP434H0512	Protein LOC100506667; Putative uncharacterized protein DKFZp434H0512			PLXNA4	plexin A4					TWF1	twinfilin actin-binding protein 1
DKFZP761J1410	Lipid phosphate phosphatase-related protein type 2			PM20D2	peptidase M20 domain containing 2					TXN2	thioredoxin 2
DKFZP779L1853				PML	promyelocytic leukemia					TXNDC15	thioredoxin domain containing 15
DKK3	dickkopf WNT signaling pathway inhibitor 3			PMPCA	peptidase (mitochondrial processing) alpha					TXNDC5	thioredoxin domain containing 5 (endoplasmic reticulum)
DLG2	discs, large homolog 2 (Drosophila)			PMVK	phosphomevalonate kinase					TXNDC8	thioredoxin domain containing 8 (spermatozoa)
DLGAP2	discs, large (Drosophila) homolog-associated protein 2			PNLIPRP3	pancreatic lipase-related protein 3					TXNL4B	thioredoxin-like 4B
DLGAP3	discs, large (Drosophila) homolog-associated protein 3			PNMAL2	paraneoplastic Ma antigen family-like 2					TXNRD3NB	thioredoxin reductase 3 neighbor
DLK1	delta-like 1 homolog (Drosophila)			PNP	purine nucleoside phosphorylase					TYK2	tyrosine kinase 2
DLK2	delta-like 2 homolog (Drosophila)			PNPLA1	patatin-like phospholipase domain containing 1					TYRO3	TYRO3 protein tyrosine kinase
DLX3	distal-less homeobox 3			PNPLA3	patatin-like phospholipase domain containing 3					TYRP1	tyrosinase-related protein 1
DMBX1	diencephalon/mesencephalon homeobox 1			PNPLA5	patatin-like phospholipase domain containing 5					TYSND1	trypsin domain containing 1
DMGDH	dimethylglycine dehydrogenase			POC1A	POC1 centriolar protein A					UAP1L1	UDP-N-acteylglucosamine pyrophosphorylase 1-like 1
DMRTA2	DMRT-like family A2			POC1B-GALNT4	POC1B-GALNT4 readthrough					UBA2	ubiquitin-like modifier activating enzyme 2
DNAH10OS	dynein, axonemal, heavy chain 10 opposite strand			POFUT1	protein O-fucosyltransferase 1					UBA52	ubiquitin A-52 residue ribosomal protein fusion product 1
DNAH17	dynein, axonemal, heavy chain 17			POFUT2	protein O-fucosyltransferase 2					UBALD1	UBA-like domain containing 1
DNAH9	dynein, axonemal, heavy chain 9			POGK	pogo transposable element with KRAB domain					UBE2D4	ubiquitin-conjugating enzyme E2D 4 (putative)
DNAI2	dynein, axonemal, intermediate chain 2			POLD3	polymerase (DNA-directed), delta 3, accessory subunit					UBE2F	ubiquitin-conjugating enzyme E2F (putative)
DNAJA3	DnaJ (Hsp40) homolog, subfamily A, member 3			POLDIP3	polymerase (DNA-directed), delta interacting protein 3					UBE2I	ubiquitin-conjugating enzyme E2I
DNAJA4	DnaJ (Hsp40) homolog, subfamily A, member 4			POLE	polymerase (DNA directed), epsilon, catalytic subunit					UBE2J2	ubiquitin-conjugating enzyme E2, J2
DNAJB13	DnaJ (Hsp40) homolog, subfamily B, member 13			POLE3	polymerase (DNA directed), epsilon 3, accessory subunit					UBE2K	ubiquitin-conjugating enzyme E2K
DNAJB2	DnaJ (Hsp40) homolog, subfamily B, member 2			POLH	polymerase (DNA directed), eta					UBE2Q1	ubiquitin-conjugating enzyme E2Q family member 1
DNAJB6	DnaJ (Hsp40) homolog, subfamily B, member 6			POLL	polymerase (DNA directed), lambda					UBE2S	ubiquitin-conjugating enzyme E2S
DNAJC10	DnaJ (Hsp40) homolog, subfamily C, member 10			POLM	polymerase (DNA directed), mu					UBE2V1	ubiquitin-conjugating enzyme E2 variant 1
DNAJC11	DnaJ (Hsp40) homolog, subfamily C, member 11			POLR1A	polymerase (RNA) I polypeptide A, 194kDa					UBE2W	ubiquitin-conjugating enzyme E2W (putative)
DNAJC15	DnaJ (Hsp40) homolog, subfamily C, member 15			POLR2D	polymerase (RNA) II (DNA directed) polypeptide D					UBE3C	ubiquitin protein ligase E3C
DNAJC18	DnaJ (Hsp40) homolog, subfamily C, member 18			POLR2E	polymerase (RNA) II (DNA directed) polypeptide E, 25kDa					UBE4A	ubiquitination factor E4A
DNAJC19	DnaJ (Hsp40) homolog, subfamily C, member 19			POLR2F	polymerase (RNA) II (DNA directed) polypeptide F					UBFD1	ubiquitin family domain containing 1
DNAJC24	DnaJ (Hsp40) homolog, subfamily C, member 24			POLR2J	polymerase (RNA) II (DNA directed) polypeptide J, 13.3kDa					UBL4B	ubiquitin-like 4B
DNAJC28	DnaJ (Hsp40) homolog, subfamily C, member 28			POLR3A	polymerase (RNA) III (DNA directed) polypeptide A, 155kDa					UBL7	ubiquitin-like 7 (bone marrow stromal cell-derived)
DNAJC5	DnaJ (Hsp40) homolog, subfamily C, member 5			POLR3B	polymerase (RNA) III (DNA directed) polypeptide B					UBN2	ubinuclein 2
DNAJC5B	DnaJ (Hsp40) homolog, subfamily C, member 5 beta			POLR3D	polymerase (RNA) III (DNA directed) polypeptide D, 44kDa					UBQLN1	ubiquilin 1
DNAJC5G	DnaJ (Hsp40) homolog, subfamily C, member 5 gamma			POM121C	POM121 transmembrane nucleoporin C					UBR2	ubiquitin protein ligase E3 component n-recognin 2
DNAL4	dynein, axonemal, light chain 4			POMGNT1	protein O-linked mannose N-acetylglucosaminyltransferase 1 (beta 1,2-)					UBR7	ubiquitin protein ligase E3 component n-recognin 7 (putative)
DNASE1L2	deoxyribonuclease I-like 2			POMT1	protein-O-mannosyltransferase 1					UBTF	upstream binding transcription factor, RNA polymerase I
DNLZ	DNL-type zinc finger			PON2	paraoxonase 2					UBXN10	UBX domain protein 10
DNM1	dynamin 1			POPDC2	popeye domain containing 2					UBXN11	UBX domain protein 11
DNMT3A	DNA (cytosine-5-)-methyltransferase 3 alpha			POU2AF1	POU class 2 associating factor 1					UBXN2A	UBX domain protein 2A
DOCK2	dedicator of cytokinesis 2			POU3F1	POU class 3 homeobox 1					UCK1	uridine-cytidine kinase 1
DOCK5	dedicator of cytokinesis 5			POU4F1	POU class 4 homeobox 1					UCK2	uridine-cytidine kinase 2
DOCK7	dedicator of cytokinesis 7			POU5F1B	POU class 5 homeobox 1B					UCN2	urocortin 2
DOK4	docking protein 4			POU6F1	POU class 6 homeobox 1					UCP2	uncoupling protein 2 (mitochondrial, proton carrier)
DOK6	docking protein 6			PPAN-P2RY11	PPAN-P2RY11 readthrough					UFD1L	ubiquitin fusion degradation 1 like (yeast)
DPAGT1	dolichyl-phosphate (UDP-N-acetylglucosamine) N-acetylglucosaminephosphotransferase 1 (GlcNAc-1-P transferase)			PPAPDC1A	phosphatidic acid phosphatase type 2 domain containing 1A					UFM1	ubiquitin-fold modifier 1
DPEP3	dipeptidase 3			PPARA	peroxisome proliferator-activated receptor alpha					UGP2	UDP-glucose pyrophosphorylase 2
DPF2	D4, zinc and double PHD fingers family 2			PPARGC1A	peroxisome proliferator-activated receptor gamma, coactivator 1 alpha					UGT2B10	UDP glucuronosyltransferase 2 family, polypeptide B10
DPP8	dipeptidyl-peptidase 8			PPDPF	pancreatic progenitor cell differentiation and proliferation factor					UHMK1	U2AF homology motif (UHM) kinase 1
DPY19L1	dpy-19-like 1 (C. elegans)			PPFIBP2	PTPRF interacting protein, binding protein 2 (liprin beta 2)					UHRF1BP1L	UHRF1 binding protein 1-like
DPYSL2	dihydropyrimidinase-like 2			PPIA	peptidylprolyl isomerase A (cyclophilin A)					UHRF2	ubiquitin-like with PHD and ring finger domains 2, E3 ubiquitin protein ligase
DPYSL3	dihydropyrimidinase-like 3			PPIE	peptidylprolyl isomerase E (cyclophilin E)					ULBP1	UL16 binding protein 1
DPYSL5	dihydropyrimidinase-like 5			PPIL2	peptidylprolyl isomerase (cyclophilin)-like 2					ULBP3	UL16 binding protein 3
DR1	down-regulator of transcription 1, TBP-binding (negative cofactor 2)			PPIL3	peptidylprolyl isomerase (cyclophilin)-like 3					ULK1	unc-51 like autophagy activating kinase 1
DRD2	dopamine receptor D2			PPIL4	peptidylprolyl isomerase (cyclophilin)-like 4					ULK2	unc-51 like autophagy activating kinase 2
DRG1	developmentally regulated GTP binding protein 1			PPIL6	peptidylprolyl isomerase (cyclophilin)-like 6					UMPS	uridine monophosphate synthetase
DRGX	dorsal root ganglia homeobox			PPIP5K2	diphosphoinositol pentakisphosphate kinase 2					UNC119B	unc-119 homolog B (C. elegans)
DRP2	dystrophin related protein 2			PPM1D	protein phosphatase, Mg2+/Mn2+ dependent, 1D					UNC45A	unc-45 homolog A (C. elegans)
DSC3	desmocollin 3			PPM1F	protein phosphatase, Mg2+/Mn2+ dependent, 1F					UNC5B	unc-5 homolog B (C. elegans)
DSCR3	Down syndrome critical region gene 3			PPM1G	protein phosphatase, Mg2+/Mn2+ dependent, 1G					UNC5D	unc-5 homolog D (C. elegans)
[truncated: 554 more rows]

## Sheet: Targets miR-3177-5p
TargetScan v.7.2: 2596 predicted targets for hsa-miR-3177-5p in TargetScan										miRDB: 568 predicted targets for hsa-miR-3177-5p in miRDB.				517 common targets in "miRDB" and "TargetScan":
[truncated: 950 more rows]
